# Supplementary material
Source: Royal Society of Chemistry journal article supplement (doi:10.1039/d6md00019c)
Supplement: d6md00019c1.pdf [file d6md00019c1.pdf]

Discovery of novel BCAT2 inhibitors: design, synthesis, in vitro evaluation, and molecular modeling studies

Dong Xu<sup>①abc</sup>, Wenxiu Weng<sup>②de</sup>, Huining Cao<sup>abc</sup>, Chao Zhang<sup>bc</sup>, Yudi Zhang<sup>de</sup>, Yan Li<sup>de</sup>, Junhai Xiao<sup>bc</sup>, Hua Xie<sup>\*de</sup>, Jialin Guo<sup>\*bc</sup>, Guoliang Chen<sup>\*a</sup>

<sup>a</sup> Key Laboratory of Structure-Based Drug Design & Discovery of Ministry of Education, School of Pharmaceutical Engineering, Shenyang Pharmaceutical University, Shenyang 110016, China

<sup>b</sup> National Engineering Research Center for the Emergency Prevention and Control Drugs, Beijing 100039, China

<sup>c</sup> Academy of Military Medical Sciences, Beijing, 100850, China

<sup>d</sup> Zhongshan Institute for Drug Discovery, Shanghai Institute of Materia Medica, Chinese Academy of Sciences, Zhongshan 528400, China

<sup>e</sup> Shanghai Institute of Materia Medica, Chinese Academy of Sciences, Shanghai 201203, China

E-mail: [spucgl@163.com](mailto:spucgl@163.com) (Chen Guoliang), [shandongguojialin@163.com](mailto:shandongguojialin@163.com) (Guo Jialin), [hxie@simm.ac.cn](mailto:hxie@simm.ac.cn) (Hua Xie)

## 1. HPLC Characterization of purity

Purity of compound **C10** and **C11** was measured by HPLC was carried out on the Agilent 1260 HPLC system with an Agilent ZORBAX Eclipse XDBC18 column (5  $\mu$ m, 4.6  $\times$  100 mm).

Method: The gradient profile was as follows: 10-90% acetonitrile (0-30 min), returned to 10% (31 min), and held for 9 min for column equilibration (total run time: 40 min).

Purity: **C10**, 95.4761%; **C11**, 99.4221%.

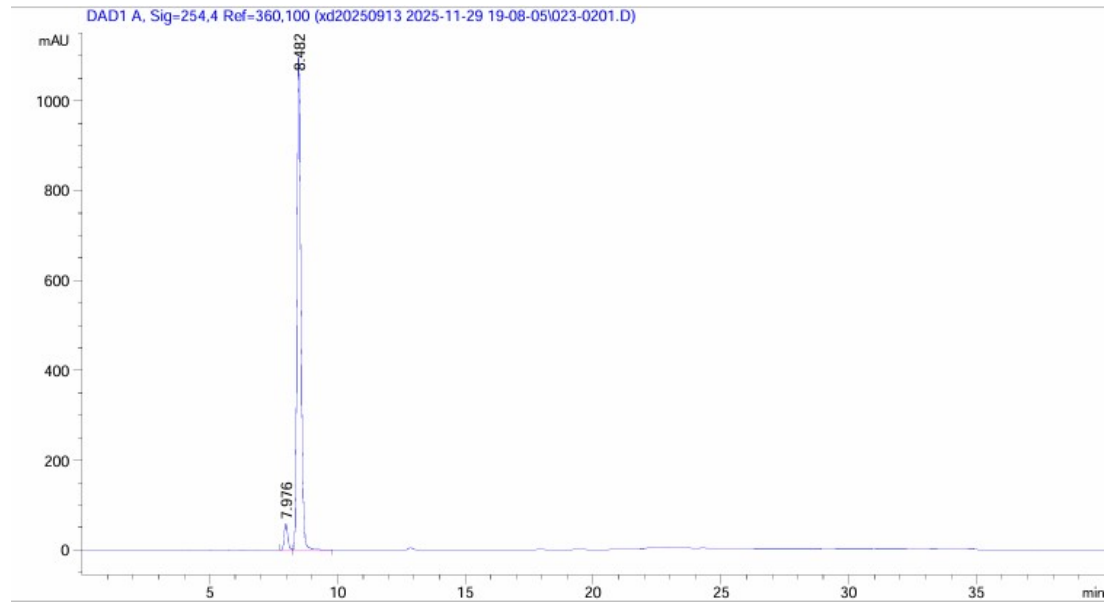

信号 1: DAD1 A, Sig=254,4 Ref=360,100

| 峰 # | 保留时间 [min] | 类型 | 峰宽 [min] | 峰面积 [mAU*s] | 峰高 [mAU]   | 峰面积 %   |
|-----|------------|----|----------|-------------|------------|---------|
| 1   | 7.976      | BV | 0.1449   | 551.56104   | 59.07063   | 4.5239  |
| 2   | 8.482      | VB | 0.1639   | 1.16406e4   | 1096.04370 | 95.4761 |

**Figure 1. HPLC Characterization of purity for C10**

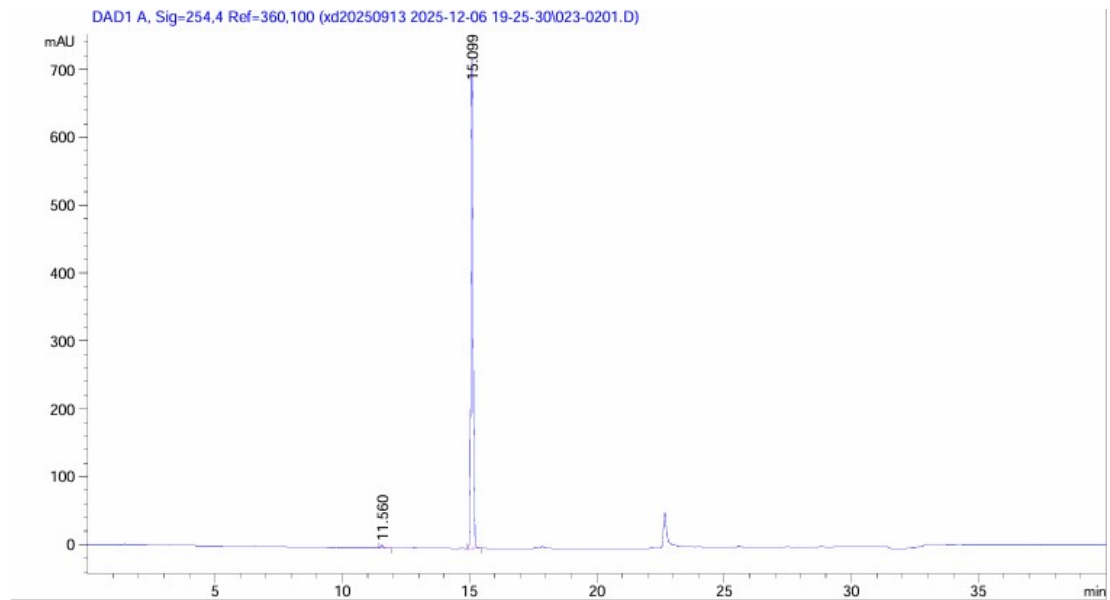

信号 1: DAD1 A, Sig=254,4 Ref=360,100

| 峰 # | 保留时间 [min] | 类型 | 峰宽 [min] | 峰面积 [mAU*s] | 峰高 [mAU]  | 峰面积 %   |
|-----|------------|----|----------|-------------|-----------|---------|
| 1   | 11.560     | BB | 0.0842   | 24.30776    | 4.41556   | 0.5779  |
| 2   | 15.099     | BB | 0.0894   | 4181.91357  | 723.90521 | 99.4221 |
| 总量: |            |    |          | 4206.22133  | 728.32077 |         |

Figure 2. HPLC Characterization of purity for C11

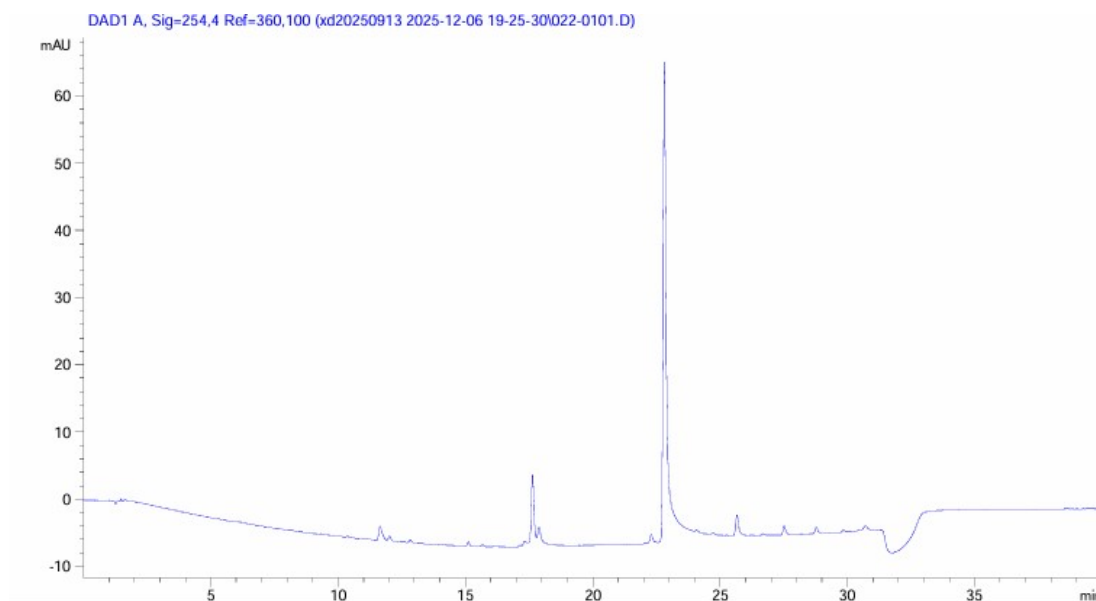

Figure 3. HPLC characterization of C11 solvent purity

## 2. Compound Data Characterization

**N<sup>2</sup>-phenyl-1H-indole-2,5-dicarboxamide (A1).** White solid, m.p. 275-277°C. Yield: 68.5%. <sup>1</sup>H NMR (600 MHz, DMSO-*d*<sub>6</sub>) δ 12.11 (s, 1H), 10.44 (s, 1H), 8.30 (s, 1H), 7.95 (s, 1H), 7.86 (d, *J* = 7.5 Hz, 1H), 7.80 (d, *J* = 10.3 Hz, 1H), 7.59 (s, 1H), 7.48 (d, *J* = 8.8 Hz, 1H), 7.37 (t, *J* = 7.9 Hz, 2H), 7.19 (s, 1H), 7.11 (t, *J* = 7.4 Hz, 1H). <sup>13</sup>C NMR (151 MHz, DMSO-*d*<sub>6</sub>) δ 169.13, 159.88, 139.42, 138.70, 133.29, 129.14, 126.86, 126.75, 124.08, 123.97, 122.54, 120.69, 112.25, 105.76. HRMS (ESI) calculated for C<sub>16</sub>H<sub>12</sub>N<sub>3</sub>O<sub>2</sub> [M - H]<sup>-</sup>: 278.0935, found: 278.0935.

**N<sup>2</sup>-cyclohexyl-1H-indole-2,5-dicarboxamide (A2).** White solid, m.p. 306-308°C. Yield: 71.0%. <sup>1</sup>H NMR (600 MHz, DMSO) δ 11.75 (s, 1H), 8.27 (d, *J* = 8.0 Hz, 1H), 8.21 (s, 1H), 7.88 (s, 1H), 7.73 (dd, *J* = 8.6, 1.7 Hz, 1H), 7.42 (d, *J* = 8.6 Hz, 1H), 7.26 (s, 1H), 7.15 (s, 1H), 3.79 (s, 1H), 1.85 (s, 2H), 1.75 (s, 2H), 1.62 (d, *J* = 11.2 Hz, 1H), 1.33 (dt, *J* = 9.7, 5.1 Hz, 4H), 1.20-1.06 (m, 1H). <sup>13</sup>C NMR (151 MHz, DMSO) δ 169.19, 160.31, 138.27, 133.70, 126.95,

126.48, 123.34, 122.21, 112.10, 103.90, 48.49, 33.01, 25.73, 25.41. HRMS (ESI) calculated for  $C_{16}H_{18}N_3O_2 [M - H]^-$ : 284.1405, found: 284.1405.

**N<sup>2</sup>-(pyridin-3-yl)-1H-indole-2,5-dicarboxamide (A3)**. White solid, m.p. 334-336°C. Yield: 73.2%. <sup>1</sup>H NMR (600 MHz, DMSO)  $\delta$  12.06 (s, 1H), 10.50 (s, 1H), 8.98 (d,  $J = 2.6$  Hz, 1H), 8.33 (dd,  $J = 4.7, 1.5$  Hz, 1H), 8.31 (d,  $J = 1.7$  Hz, 1H), 8.22 (ddd,  $J = 8.3, 2.6, 1.5$  Hz, 1H), 7.93 (s, 1H), 7.81 (dd,  $J = 8.7, 1.7$  Hz, 1H), 7.56 (s, 1H), 7.48 (d,  $J = 8.6$  Hz, 1H), 7.42 (dd,  $J = 8.3, 4.7$  Hz, 1H), 7.21 (s, 1H). <sup>13</sup>C NMR (151 MHz, DMSO- $d_6$ )  $\delta$  169.05, 160.31, 145.03, 142.25, 138.82, 136.04, 132.67, 127.63, 126.90, 126.84, 124.18, 124.12, 122.64, 112.34, 105.81, 40.52. HRMS (ESI) calculated for  $C_{15}H_{11}N_4O_2 [M - H]^-$ : 279.0887, found: 279.0887.

**N<sup>2</sup>-(pyridin-2-yl)-1H-indole-2,5-dicarboxamide (A4)**. White solid, m.p. 314-316°C. Yield: 74.5%. <sup>1</sup>H NMR (600 MHz, DMSO- $d_6$ )  $\delta$  11.98 (s, 1H), 10.86 (s, 1H), 8.37 (dd,  $J = 4.8, 2.0, 0.9$  Hz, 1H), 8.24 (d,  $J = 0.8$  Hz, 1H), 8.20 (d,  $J = 8.4$  Hz, 1H), 7.88 (s, 1H), 7.82 (dd,  $J = 8.4, 7.3, 2.0$  Hz, 1H), 7.76 (dd,  $J = 8.6, 1.7$  Hz, 1H), 7.71 (d,  $J = 0.9$  Hz, 1H), 7.44 (d,  $J = 8.5$  Hz, 1H), 7.14 (dd,  $J = 7.4, 4.8, 1.0$  Hz, 2H). <sup>13</sup>C NMR (151 MHz, DMSO- $d_6$ )  $\delta$  169.03, 160.30, 152.44, 148.45, 138.90, 138.70, 132.52, 126.87, 126.81, 124.29, 122.67, 120.23, 115.07, 112.33, 106.66. HRMS (ESI) calculated for  $C_{15}H_{11}N_4O_2 [M - H]^-$ : 279.0887, found: 279.0888.

**N<sup>2</sup>-propyl-1H-indole-2,5-dicarboxamide (A5)**. White solid, m.p. 257-259°C. Yield: 80.6%. <sup>1</sup>H NMR (600 MHz, DMSO- $d_6$ )  $\delta$  11.85-11.83 (m, 1H), 8.62 (t,  $J = 5.7$  Hz, 1H), 8.23 (d,  $J = 1.7$  Hz, 1H), 7.90 (s, 1H), 7.74 (dd,  $J = 8.6, 1.7$  Hz, 1H), 7.42 (d,  $J = 8.6$  Hz, 1H), 7.31-7.21 (m, 1H), 7.15 (s, 1H), 3.31-3.18 (m, 2H), 1.56 (h,  $J = 7.4$  Hz, 2H), 0.91 (t,  $J = 7.4$  Hz, 3H). <sup>13</sup>C NMR (151 MHz, DMSO- $d_6$ )  $\delta$  169.20, 161.19, 138.28, 133.71, 126.93, 126.49, 123.38, 122.21, 112.10, 103.89, 41.07, 22.96, 11.95. HRMS (ESI) calculated for  $C_{13}H_{14}N_3O_2 [M - H]^-$ : 244.1902, found: 244.1092.

**N<sup>2</sup>-butyl-1H-indole-2,5-dicarboxamide (A6)**. White solid, m.p. 229-231°C. Yield: 82.8%. <sup>1</sup>H NMR (600 MHz, DMSO- $d_6$ )  $\delta$  11.77 (s, 1H), 8.50 (t,  $J = 5.7$  Hz, 1H), 8.22 (s, 1H), 7.88 (s, 1H), 7.74 (dd,  $J = 8.6, 1.7$  Hz, 1H), 7.42 (d,  $J = 8.6$  Hz, 1H), 7.21 (d,  $J = 1.1$  Hz, 1H), 7.15 (s, 1H), 3.33-3.26 (m, 2H), 1.56-1.49 (m, 2H), 1.39-1.31 (m, 2H), 0.91 (t,  $J = 7.4$  Hz, 3H). <sup>13</sup>C NMR (151 MHz, DMSO- $d_6$ )  $\delta$  169.18, 161.18, 138.27, 133.66, 126.96, 126.51, 123.37, 122.19, 112.12, 103.65, 38.94, 31.81, 20.12, 14.19. HRMS (ESI) calculated for  $C_{14}H_{16}N_3O_2 [M - H]^-$ : 258.1248, found: 258.1248.

**N<sup>2</sup>-(1,3,4-thiadiazol-2-yl)-1H-indole-2,5-dicarboxamide (A7)**. White solid, m.p. 371-374°C. Yield: 46.3%. <sup>1</sup>H NMR (600 MHz, DMSO- $d_6$ )  $\delta$  13.18 (s, 1H), 12.20 (s, 1H), 9.23 (s, 1H), 8.32 (d,  $J = 1.6$  Hz, 1H), 7.97 (s, 1H), 7.87-7.79 (m, 2H), 7.52 (d,  $J = 8.7$  Hz, 1H), 7.21 (s, 1H). <sup>13</sup>C NMR (151 MHz, DMSO- $d_6$ )  $\delta$  168.90, 139.29, 127.15, 126.72, 124.97, 122.98, 112.50, 108.11. HRMS (ESI) calculated for  $C_{12}H_8N_5O_2S [M - H]^-$ : 286.0404, found: 286.0404.

**N<sup>2</sup>-(thiophen-3-yl)-1H-indole-2,5-dicarboxamide (A8)**. White solid, m.p. 298-300°C. Yield:

69.3%. <sup>1</sup>H NMR (600 MHz, DMSO-*d*<sub>6</sub>) δ 11.99 (d, *J* = 2.2 Hz, 1H), 10.76 (s, 1H), 8.29 (d, *J* = 1.7 Hz, 1H), 7.92 (s, 1H), 7.79 (dd, *J* = 8.7, 1.6 Hz, 1H), 7.74 (dd, *J* = 3.3, 1.2 Hz, 1H), 7.52 (dd, *J* = 5.1, 3.3 Hz, 1H), 7.47 (d, *J* = 8.6 Hz, 2H), 7.35 (dd, *J* = 5.1, 1.2 Hz, 1H), 7.20 (s, 1H). <sup>13</sup>C NMR (151 MHz, DMSO-*d*<sub>6</sub>) δ 169.16, 159.09, 138.72, 137.03, 132.94, 126.94, 126.77, 125.23, 123.90, 122.52, 122.37, 112.28, 109.95, 104.92. HRMS (ESI) calculated for C<sub>14</sub>H<sub>10</sub>N<sub>3</sub>O<sub>2</sub>S [M - H]<sup>-</sup>: 284.0499, found: 284.0499.

N<sup>2</sup>-(tetrahydro-2H-pyran-4-yl)-1H-indole-2,5-dicarboxamide (**A9**). White solid, m.p. 318-320°C. Yield: 54.6%. <sup>1</sup>H NMR (600 MHz, DMSO-*d*<sub>6</sub>) δ 11.79 (s, 1H), 8.39 (d, *J* = 7.7 Hz, 1H), 8.23 (s, 1H), 7.88 (s, 1H), 7.77-7.68 (m, 1H), 7.43 (d, *J* = 8.6 Hz, 1H), 7.27 (s, 1H), 7.16 (s, 1H), 4.04 (td, *J* = 11.8, 8.3, 4.2 Hz, 1H), 3.97-3.80 (m, 2H), 3.48-3.36 (m, 2H), 1.79 (dd, *J* = 13.3, 4.3 Hz, 2H), 1.60 (, *J* = 12.0, 4.4 Hz, 2H). <sup>13</sup>C NMR (151 MHz, DMSO-*d*<sub>6</sub>) δ 169.16, 160.53, 138.32, 133.49, 126.92, 126.54, 123.44, 122.26, 112.13, 104.05, 66.64, 45.93, 33.02. HRMS (ESI) calculated for C<sub>15</sub>H<sub>16</sub>N<sub>3</sub>O<sub>3</sub> [M + H]<sup>+</sup>: 288.1343, found: 288.1343.

N<sup>2</sup>-benzyl-1H-indole-2,5-dicarboxamide (**A10**). White solid, m.p. 303-305°C. Yield: 80.6%. <sup>1</sup>H NMR (600 MHz, DMSO-*d*<sub>6</sub>) δ 11.87-11.81 (m, 1H), 9.11 (t, *J* = 6.1 Hz, 1H), 8.28-8.21 (m, 1H), 7.88 (s, 1H), 7.75 (dd, *J* = 8.7, 1.7 Hz, 1H), 7.44 (d, *J* = 8.5 Hz, 1H), 7.37-7.31 (m, 4H), 7.29 (dd, *J* = 2.1, 0.9 Hz, 1H), 7.25 (tt, *J* = 5.8, 2.9 Hz, 1H), 7.16 (s, 1H), 4.53 (d, *J* = 6.1 Hz, 2H). <sup>13</sup>C NMR (151 MHz, DMSO-*d*<sub>6</sub>) δ 169.16, 160.53, 138.32, 133.49, 126.92, 126.54, 123.44, 122.26, 112.13, 104.05, 66.64, 45.93, 33.02. HRMS (ESI) calculated for C<sub>17</sub>H<sub>16</sub>N<sub>3</sub>O<sub>2</sub> [M + H]<sup>+</sup>: 294.1237, found: 294.1237.

N<sup>2</sup>-(2-(methylsulfonamido)phenyl)-1H-indole-2,5-dicarboxamide (**A11**). White solid, m.p. 279-281°C. Yield: 49.5%. <sup>1</sup>H NMR (400 MHz, DMSO-*d*<sub>6</sub>) δ 9.94 (s, 1H), 9.43 (s, 1H), 8.28 (dt, *J* = 2.1, 1.1 Hz, 1H), 7.72 (t, *J* = 1.1 Hz, 2H), 7.68 (s, 2H), 7.57 (dd, *J* = 7.9, 1.7 Hz, 1H), 7.48 (dd, *J* = 7.9, 1.7 Hz, 1H), 7.28 (d, *J* = 2.1 Hz, 1H), 7.20-7.09 (m, 2H). <sup>13</sup>C NMR (151 MHz, DMSO-*d*<sub>6</sub>) δ 169.06, 160.16, 138.79, 132.81, 132.63, 130.33, 127.11, 126.93, 126.80, 126.56, 126.48, 125.86, 124.17, 122.50, 112.37, 105.22, 40.86. HRMS (ESI) calculated for C<sub>17</sub>H<sub>15</sub>N<sub>4</sub>O<sub>4</sub>S [M - H]<sup>-</sup>: 371.0819, found: 371.0819.

N<sup>2</sup>-(2-(2-amino-2-oxoethyl)phenyl)-1H-indole-2,5-dicarboxamide (**A12**). White solid, m.p. 280-282°C. Yield: 64.1%. <sup>1</sup>H NMR (600 MHz, DMSO-*d*<sub>6</sub>) δ 12.05 (d, *J* = 2.2 Hz, 1H), 11.46 (s, 1H), 8.29-8.25 (m, 1H), 8.02 (d, *J* = 2.6 Hz, 1H), 7.98-7.93 (m, 1H), 7.88 (s, 1H), 7.78 (dd, *J* = 8.7, 1.7 Hz, 1H), 7.48 (dt, *J* = 8.7, 0.8 Hz, 1H), 7.42 (d, *J* = 2.5 Hz, 1H), 7.38 (dd, *J* = 2.1, 0.9 Hz, 1H), 7.32 (td, *J* = 7.0, 1.6 Hz, 2H), 7.21-7.11 (m, 2H), 3.59 (s, 2H). <sup>13</sup>C NMR (151 MHz, DMSO-*d*<sub>6</sub>) δ 174.93, 169.08, 159.57, 138.74, 137.59, 133.52, 131.12, 128.57, 127.83, 126.91, 126.87, 125.00, 123.97, 123.77, 122.29, 112.36, 104.38, 40.90. HRMS (ESI) calculated for C<sub>18</sub>H<sub>15</sub>N<sub>4</sub>O<sub>3</sub> [M - H]<sup>-</sup>: 335.1150, found: 335.1150.

N<sup>2</sup>-(3-(2-amino-2-oxoethyl)phenyl)-1H-indole-2,5-dicarboxamide (**A13**). White solid, m.p.

268-270°C. Yield: 70.3%. <sup>1</sup>H NMR (600 MHz, DMSO-*d*<sub>6</sub>) δ 11.95 (d, *J* = 2.2 Hz, 1H), 10.27 (s, 1H), 8.29 (d, *J* = 1.7 Hz, 1H), 7.92 (s, 1H), 7.79 (dd, *J* = 8.6, 1.7 Hz, 1H), 7.74 (dd, *J* = 8.1, 2.1 Hz, 1H), 7.68 (d, *J* = 1.9 Hz, 1H), 7.55 (d, *J* = 2.2 Hz, 1H), 7.53-7.45 (m, 2H), 7.30 (t, *J* = 7.8 Hz, 1H), 7.20 (s, 1H), 7.02 (d, *J* = 7.5 Hz, 1H), 6.93 (s, 1H), 3.40 (s, 2H). <sup>13</sup>C NMR (151 MHz, DMSO-*d*<sub>6</sub>) δ 172.62, 169.13, 159.86, 139.16, 138.69, 137.49, 133.25, 128.94, 126.92, 126.76, 123.95, 122.52, 121.35, 118.82, 112.28, 105.31, 42.79. HRMS (ESI) calculated for C<sub>18</sub>H<sub>15</sub>N<sub>4</sub>O<sub>3</sub> [M - H]<sup>-</sup>: 335.1150, found: 335.1150.

2-(2-(5-carbamoyl-1H-indole-2-carboxamido)phenyl)acetic acid (**A14**). White solid, m.p. 295-297°C. Yield: 67.9%. <sup>1</sup>H NMR (600 MHz, DMSO-*d*<sub>6</sub>) δ 12.39 (s, 1H), 11.97 (d, *J* = 2.3 Hz, 1H), 10.09 (s, 1H), 7.90 (s, 1H), 7.78 (dd, *J* = 8.6, 1.7 Hz, 1H), 7.51 (dd, *J* = 7.9, 1.3 Hz, 1H), 7.46 (d, *J* = 8.6 Hz, 1H), 7.41 (d, *J* = 2.1 Hz, 1H), 7.38-7.31 (m, 2H), 7.23 (td, *J* = 7.5, 1.3 Hz, 1H), 7.18 (s, 1H), 3.71 (s, 2H). <sup>13</sup>C NMR (151 MHz, DMSO-*d*<sub>6</sub>) δ 173.19, 169.09, 159.99, 138.62, 136.60, 133.07, 131.55, 131.11, 127.78, 126.89, 126.76, 126.72, 126.31, 123.88, 122.37, 112.27, 104.97, 38.04. HRMS (ESI) calculated for C<sub>18</sub>H<sub>16</sub>N<sub>3</sub>O<sub>4</sub> [M + H]<sup>+</sup>: 338.1135, found: 338.1133.

2-(3-(5-carbamoyl-1H-indole-2-carboxamido)phenyl)acetic acid (**A15**). White solid, m.p. 289-291°C. Yield: 73.0%. <sup>1</sup>H NMR (600 MHz, DMSO-*d*<sub>6</sub>) δ 12.39 (s, 1H), 11.96 (d, *J* = 2.2 Hz, 1H), 10.28 (s, 1H), 8.30 (d, *J* = 1.6 Hz, 1H), 7.92 (s, 1H), 7.78 (dd, *J* = 16.2, 8.8, 1.9 Hz, 2H), 7.69 (t, *J* = 1.9 Hz, 1H), 7.55 (d, *J* = 2.2 Hz, 1H), 7.48 (d, *J* = 8.6 Hz, 1H), 7.32 (t, *J* = 7.8 Hz, 1H), 7.20 (s, 1H), 7.02 (d, *J* = 7.5 Hz, 1H), 3.59 (s, 2H). <sup>13</sup>C NMR (151 MHz, DMSO-*d*<sub>6</sub>) δ 173.11, 169.11, 159.89, 139.29, 138.71, 136.01, 133.20, 129.10, 126.91, 126.77, 125.26, 123.97, 122.53, 121.48, 119.06, 112.29, 105.34, 41.39. HRMS (ESI) calculated for C<sub>18</sub>H<sub>16</sub>N<sub>3</sub>O<sub>4</sub> [M + H]<sup>+</sup>: 338.1135, found: 338.1132.

N<sup>2</sup>-(2-(hydroxymethyl)phenyl)-1H-indole-2,5-dicarboxamide (**A16**). Brown solid, m.p. 234-236°C. Yield: 50.9%. <sup>1</sup>H NMR (600 MHz, DMSO-*d*<sub>6</sub>) δ 12.04 (d, *J* = 2.2 Hz, 1H), 10.22 (s, 1H), 8.29 (d, *J* = 1.7 Hz, 1H), 7.91 (s, 1H), 7.79 (dd, *J* = 8.7, 1.7 Hz, 1H), 7.74 (dd, *J* = 8.0, 1.3 Hz, 1H), 7.50-7.43 (m, 2H), 7.36-7.30 (m, 2H), 7.24-7.17 (m, 2H), 5.64 (t, *J* = 5.3 Hz, 1H), 4.65 (d, *J* = 5.2 Hz, 2H). <sup>13</sup>C NMR (151 MHz, DMSO-*d*<sub>6</sub>) δ 169.10, 159.76, 138.74, 135.99, 135.10, 133.17, 127.99, 127.79, 126.89, 125.45, 124.32, 123.97, 122.41, 112.34, 104.47, 61.33. HRMS (ESI) calculated for C<sub>17</sub>H<sub>16</sub>N<sub>3</sub>O<sub>3</sub> [M + H]<sup>+</sup>: 310.1186, found: 310.1186.

N<sup>2</sup>-(3-(hydroxymethyl)phenyl)-1H-indole-2,5-dicarboxamide (**A17**). Brown solid, m.p. 272-275°C. Yield: 55.4%. <sup>1</sup>H NMR (600 MHz, DMSO-*d*<sub>6</sub>) δ 11.96 (s, 1H), 10.27 (s, 1H), 8.30 (s, 1H), 7.92 (s, 1H), 7.82-7.76 (m, 2H), 7.74 (d, *J* = 8.0 Hz, 1H), 7.56 (s, 1H), 7.48 (d, *J* = 8.6 Hz, 1H), 7.32 (t, *J* = 7.8 Hz, 1H), 7.20 (s, 1H), 7.06 (d, *J* = 7.6 Hz, 1H), 5.25 (t, *J* = 5.7 Hz, 1H), 4.53 (d, *J* = 5.6 Hz, 2H). <sup>13</sup>C NMR (151 MHz, DMSO-*d*<sub>6</sub>) δ 169.10, 159.86, 143.68, 139.20, 138.69, 133.27, 128.86, 126.92, 126.76, 123.94, 122.51, 122.17, 119.02, 118.76, 118.71, 112.28, 105.29, 63.36, 40.89, 40.51. HRMS (ESI) calculated for C<sub>17</sub>H<sub>16</sub>N<sub>3</sub>O<sub>3</sub> [M + H]<sup>+</sup>:

310.1186, found: 310.1187.

N<sup>2</sup>-(2-(2-hydroxyethyl)phenyl)-1H-indole-2,5-dicarboxamide (**A18**). Brown solid, m.p. 254-256°C. Yield: 61.8%. <sup>1</sup>H NMR (600 MHz, DMSO-*d*<sub>6</sub>) δ 12.02 (d, *J* = 2.2 Hz, 1H), 10.40 (s, 1H), 8.27 (d, *J* = 1.6 Hz, 1H), 7.91 (s, 1H), 7.79 (dd, *J* = 8.6, 1.7 Hz, 1H), 7.65 (d, *J* = 7.9 Hz, 1H), 7.48 (d, *J* = 8.6 Hz, 1H), 7.38-7.25 (m, 3H), 7.24-7.13 (m, 2H), 5.47 (t, *J* = 4.3 Hz, 1H), 3.72 (q, *J* = 6.0 Hz, 2H), 2.84 (t, *J* = 6.3 Hz, 2H). <sup>13</sup>C NMR (151 MHz, DMSO-*d*<sub>6</sub>) δ 169.11, 159.91, 138.66, 136.72, 134.80, 133.35, 130.95, 127.07, 126.91, 126.84, 125.95, 125.70, 123.89, 122.32, 62.65, 35.50. HRMS (ESI) calculated for C<sub>18</sub>H<sub>16</sub>N<sub>3</sub>O<sub>3</sub> [M - H]<sup>-</sup>: 322.1197, found: 322.1197.

N<sup>2</sup>-(3-(2-hydroxyethyl)phenyl)-1H-indole-2,5-dicarboxamide (**A19**). Brown solid, m.p. 261-263°C. Yield: 65.9%. <sup>1</sup>H NMR (600 MHz, DMSO-*d*<sub>6</sub>) δ 11.95 (s, 1H), 10.21 (s, 1H), 8.29 (d, *J* = 1.7 Hz, 1H), 7.92 (s, 1H), 7.79 (dd, *J* = 8.6, 1.7 Hz, 1H), 7.70 (dd, *J* = 8.1, 1.1 Hz, 1H), 7.62 (t, *J* = 1.9 Hz, 1H), 7.54 (s, 1H), 7.48 (d, *J* = 8.6 Hz, 1H), 7.28 (t, *J* = 7.8 Hz, 1H), 7.20 (s, 1H), 6.98 (dt, *J* = 7.6, 1.4 Hz, 1H), 4.69 (t, *J* = 5.2 Hz, 1H), 3.64 (td, *J* = 7.1, 5.1 Hz, 2H), 2.74 (t, *J* = 7.1 Hz, 2H). <sup>13</sup>C NMR (151 MHz, DMSO-*d*<sub>6</sub>) δ 169.10, 159.84, 140.55, 139.16, 138.68, 133.29, 128.95, 126.92, 126.77, 124.80, 123.93, 122.50, 121.17, 118.39, 112.27, 105.24, 62.62. HRMS (ESI) calculated for C<sub>18</sub>H<sub>16</sub>N<sub>3</sub>O<sub>3</sub> [M - H]<sup>-</sup>: 322.1197, found: 322.1197.

N-(2-(2-amino-2-oxoethyl)phenyl)terephthalamide (**B1**). White solid, m.p. 272-274°C. Yield: 59.6%. <sup>1</sup>H NMR (600 MHz, DMSO-*d*<sub>6</sub>) δ 11.34 (s, 1H), 8.13 (s, 1H), 8.08 (d, *J* = 8.2 Hz, 2H), 8.03-7.99 (m, 2H), 7.96 (d, *J* = 2.6 Hz, 1H), 7.90 (d, *J* = 8.2 Hz, 1H), 7.55 (s, 1H), 7.38-7.33 (m, 1H), 7.30 (dd, *J* = 7.2, 4.2, 2.6 Hz, 2H), 7.15 (td, *J* = 7.5, 1.3 Hz, 1H), 3.58 (s, 2H). <sup>13</sup>C NMR (151 MHz, DMSO-*d*<sub>6</sub>) δ 174.85, 167.64, 164.51, 137.69, 137.48, 137.35, 131.02, 129.20, 128.18, 127.77, 127.71, 125.30, 124.38. HRMS (ESI) calculated for C<sub>16</sub>H<sub>16</sub>N<sub>3</sub>O<sub>3</sub> [M + H]<sup>+</sup>: 298.1186, found: 298.1177.

N-(3-(2-amino-2-oxoethyl)phenyl)terephthalamide (**B2**). White solid, m.p. 301-313°C. Yield: 63.5%. <sup>1</sup>H NMR (600 MHz, DMSO-*d*<sub>6</sub>) δ 10.32 (s, 1H), 8.12 (s, 1H), 8.06-7.97 (m, 4H), 7.70 (t, *J* = 1.9 Hz, 1H), 7.65 (dd, *J* = 8.2, 2.2, 1.1 Hz, 1H), 7.53 (s, 1H), 7.48 (s, 1H), 7.28 (t, *J* = 7.8 Hz, 1H), 7.02 (dt, *J* = 7.7, 1.3 Hz, 1H), 6.94-6.87 (m, 1H), 3.38 (s, 2H). <sup>13</sup>C NMR (151 MHz, DMSO-*d*<sub>6</sub>) δ 172.56, 167.66, 165.31, 139.32, 137.69, 137.43, 137.26, 128.83, 128.06, 127.94, 125.23, 121.59, 119.00, 42.79. HRMS (ESI) calculated for C<sub>16</sub>H<sub>16</sub>N<sub>3</sub>O<sub>3</sub> [M + H]<sup>+</sup>: 298.1186, found: 298.1186.

N-(2-(2-hydroxyethyl)phenyl)terephthalamide (**B3**). Brown solid, m.p. 274-276°C. Yield: 71.6%. <sup>1</sup>H NMR (600 MHz, DMSO-*d*<sub>6</sub>) δ 10.35 (s, 1H), 8.13 (s, 1H), 8.01 (s, 4H), 7.60 (d, *J* = 7.9 Hz, 1H), 7.55 (s, 1H), 7.31 (dd, *J* = 7.6, 1.6 Hz, 1H), 7.26 (td, *J* = 7.6, 1.6 Hz, 1H), 7.18 (td, *J* = 7.4, 1.4 Hz, 1H), 5.35 (t, *J* = 4.4 Hz, 1H), 3.68 (td, *J* = 6.4, 4.4 Hz, 2H), 2.81 (t, *J* = 6.4 Hz, 2H). <sup>13</sup>C NMR (151 MHz, DMSO-*d*<sub>6</sub>) δ 167.62, 164.97, 137.37, 136.99, 134.99, 130.84, 128.13, 127.77,

126.97, 126.11, 126.02, 62.57, 35.43. HRMS (ESI) calculated for  $C_{16}H_{17}N_2O_3$   $[M + H]^+$ : 283.1088, found: 283.1088.

N-(3-(2-hydroxyethyl)phenyl)terephthalamide (**B4**). Brown solid, m.p. 263-265°C. Yield: 68.1%.  $^1H$  NMR (600 MHz, DMSO- $d_6$ )  $\delta$  10.28 (s, 1H), 8.13 (s, 1H), 8.00 (d,  $J = 2.4$  Hz, 4H), 7.62 (d,  $J = 8.4$  Hz, 2H), 7.53 (s, 1H), 7.26 (t,  $J = 7.7$  Hz, 1H), 6.97 (d,  $J = 7.6, 1.5$  Hz, 1H), 4.71-4.68 (m, 1H), 3.62 (td,  $J = 7.1, 5.2$  Hz, 2H), 2.72 (t,  $J = 7.1$  Hz, 2H).  $^{13}C$  NMR (151 MHz, DMSO- $d_6$ )  $\delta$  128.87, 128.00 (d,  $J = 14.2$  Hz), 125.00, 121.41, 118.61, 62.62, 40.45. HRMS (ESI) calculated for  $C_{16}H_{15}N_2O_3$   $[M - H]^-$ : 283.1088, found: 283.1088.

N-(2-(methylsulfonamido)phenyl)terephthalamide (**B5**). White solid, m.p. 215-217°C. Yield: 73.8%.  $^1H$  NMR (600 MHz, DMSO- $d_6$ )  $\delta$  9.90 (s, 1H), 9.17 (s, 1H), 8.14 (s, 1H), 8.03 (s, 4H), 7.73 (dd,  $J = 7.8, 1.8$  Hz, 1H), 7.55 (s, 1H), 7.46 (dd,  $J = 7.7, 1.8$  Hz, 1H), 7.33-7.26 (m, 2H), 2.98 (s, 3H).  $^{13}C$  NMR (151 MHz, DMSO- $d_6$ )  $\delta$  167.61, 165.47, 137.59, 137.01, 132.70, 130.82, 128.11, 128.02, 126.87, 126.68, 126.35, 126.21. HRMS (ESI) calculated for  $C_{15}H_{14}N_3O_4$   $[M - H]^-$ : 332.0711, found: 332.0711.

N-(1,3,4-thiadiazol-2-yl)terephthalamide (**B6**). White solid, m.p. 300-302°C. Yield: 64.1%.  $^1H$  NMR (600 MHz, DMSO- $d_6$ )  $\delta$  13.18 (s, 1H), 9.25 (s, 1H), 8.18 (d,  $J = 8.2$  Hz, 3H), 8.03 (d,  $J = 8.4$  Hz, 2H), 7.58 (s, 1H).  $^{13}C$  NMR (151 MHz, DMSO- $d_6$ )  $\delta$  167.46, 149.63, 138.46, 128.85, 128.14. HRMS (ESI) calculated for  $C_{10}H_7N_4O_2S$   $[M - H]^-$ : 247.0295, found: 247.0296.

N<sup>1</sup>-methyl-N<sup>4</sup>-(1,3,4-thiadiazol-2-yl)terephthalamide (**B7**). White solid, m.p. 305-307°C. Yield: 55.3%.  $^1H$  NMR (600 MHz, DMSO- $d_6$ )  $\delta$  13.18 (s, 1H), 9.25 (s, 1H), 8.63 (d,  $J = 4.7$  Hz, 1H), 8.18 (d,  $J = 8.3$  Hz, 2H), 7.98 (d,  $J = 8.4$  Hz, 2H), 2.81 (d,  $J = 4.5$  Hz, 3H).  $^{13}C$  NMR (151 MHz, DMSO- $d_6$ )  $\delta$  166.19, 149.60, 138.64, 128.93, 127.74, 26.81. HRMS (ESI) calculated for  $C_{11}H_9N_4O_2S$   $[M - H]^-$ : 261.0452, found: 261.0452.

N<sup>1</sup>-methyl-N<sup>4</sup>-(2-(methylsulfonamido)phenyl)terephthalamide (**B8**). White solid, m.p. 229-231°C. Yield: 72.1%.  $^1H$  NMR (600 MHz, DMSO- $d_6$ )  $\delta$  10.23 (s, 1H), 9.51 (s, 1H), 8.70 (d,  $J = 4.6$  Hz, 1H), 8.12 (d,  $J = 8.4$  Hz, 2H), 8.00 (d,  $J = 8.4$  Hz, 2H), 7.71 (dd,  $J = 7.9, 1.7$  Hz, 1H), 7.44 (dd,  $J = 7.8, 1.7$  Hz, 1H), 7.32-7.26 (m, 2H), 2.92 (s, 3H), 2.81 (d,  $J = 4.5$  Hz, 3H).  $^{13}C$  NMR (151 MHz, DMSO- $d_6$ )  $\delta$  166.30, 165.43, 137.75, 136.68, 132.84, 130.95, 128.22, 127.69, 126.76, 126.74, 126.68, 126.56, 60.23, 26.78. HRMS (ESI) calculated for  $C_{16}H_{16}N_3O_4S$   $[M - H]^-$ : 346.0867, found: 346.0867.

2-(2-(4-(methylcarbamoyl)benzamido)phenyl)acetic acid (**B9**). White solid, m.p. 239-241°C. Yield: 68.5%.  $^1H$  NMR (600 MHz, DMSO- $d_6$ )  $\delta$  12.37 (s, 1H), 10.10 (s, 1H), 8.59 (d,  $J = 4.7$  Hz, 1H), 8.01 (d,  $J = 8.0$  Hz, 2H), 7.96 (d,  $J = 8.3$  Hz, 2H), 7.45 (d,  $J = 7.9$  Hz, 1H), 7.36-7.28 (m, 2H), 7.25-7.21 (m, 1H), 3.67 (s, 2H), 2.82 (d,  $J = 4.5$  Hz, 3H).  $^{13}C$  NMR (151 MHz, DMSO- $d_6$ )  $\delta$  173.17, 166.37, 165.23, 137.50, 137.14, 136.95, 131.50, 131.35, 128.09, 127.71, 127.57, 126.89, 126.42, 38.10, 26.79. HRMS (ESI) calculated for  $C_{17}H_{17}N_2O_4$   $[M + H]^+$ : 313.1183,

found: 313.1183.

2-((1-(2,4-difluorobenzoyl)piperidin-4-yl)amino)-N<sup>1</sup>-phenylterephthalamide (**C1**). Yellow solid, m.p. 165-167°C. Yield: 76.4%. <sup>1</sup>H NMR (600 MHz, DMSO-*d*<sub>6</sub>) δ 10.21 (s, 1H), 8.06 (s, 1H), 7.78 (d, *J* = 8.1 Hz, 1H), 7.70 (d, *J* = 8.0 Hz, 2H), 7.54 (dd, *J* = 19.8, 7.8 Hz, 2H), 7.46 (s, 1H), 7.38-7.32 (m, 3H), 7.28 (s, 1H), 7.21-7.07 (m, 3H), 4.33 (d, *J* = 13.1 Hz, 1H), 3.87-3.79 (m, 1H), 3.41 (d, *J* = 13.7 Hz, 1H), 3.25 (t, *J* = 12.3 Hz, 1H), 3.20-3.12 (m, 1H), 2.13-2.05 (m, 1H), 1.95 (d, *J* = 12.6 Hz, 1H), 1.44-1.32 (m, 2H). <sup>13</sup>C NMR (151 MHz, DMSO-*d*<sub>6</sub>) δ 168.15, 168.08, 163.07 (d, *J* = 243 Hz), 163.59, 158.49 (d, *J* = 256.5 Hz), 148.37, 139.30, 138.40, 130.75, 130.72, 130.74 (q, *J* = 6 Hz), 129.82, 129.00, 124.26, 121.42 (d, *J* = 18 Hz) 121.38, 117.96, 113.93, 112.68 (d, *J* = 21.75 Hz), 111.01, 104.85 (t, *J* = 10.5 Hz) 55.38, 48.29, 31.85. HRMS (ESI) calculated for C<sub>26</sub>H<sub>25</sub>F<sub>2</sub>N<sub>4</sub>O<sub>3</sub> [M + H]<sup>+</sup>: 479.1889, found: 479.1889.

2-((1-(2,4-difluorobenzoyl)piperidin-4-yl)amino)-N<sup>1</sup>-(pyridin-2-yl)terephthalamide (**C2**). Yellow solid, m.p. 174-176°C. Yield: 81.2%. <sup>1</sup>H NMR (600 MHz, DMSO-*d*<sub>6</sub>) δ 10.83 (s, 1H), 8.41-8.38 (m, 1H), 8.05 (d, *J* = 8.3 Hz, 1H), 7.88 (d, *J* = 8.0 Hz, 1H), 7.86-7.82 (m, 1H), 7.53 (d, *J* = 8.0 Hz, 2H), 7.39-7.35 (m, 1H), 7.34 (d, *J* = 1.6 Hz, 1H), 7.20-7.15 (m, 2H), 6.99 (d, *J* = 8.0, 1.5 Hz, 1H), 4.37 (d, *J* = 13.4 Hz, 1H), 3.85-3.78 (m, 1H), 3.40 (d, *J* = 13.5 Hz, 1H), 3.23 (t, *J* = 12.4 Hz, 1H), 3.10 (t, *J* = 12.1 Hz, 1H), 2.07 (d, *J* = 12.6 Hz, 1H), 1.91 (s, 1H), 1.36 (q, *J* = 12.9 Hz, 2H). <sup>13</sup>C NMR (151 MHz, DMSO-*d*<sub>6</sub>) δ 168.67, 168.03, 163.59, 163.08 (d, *J* = 248.4 Hz), 158.49 (d, *J* = 256.5 Hz), 152.42, 148.68, 148.44, 138.77, 138.42, 130.74 (q, *J* = 6 Hz), 130.42, 121.43 (d, *J* = 18.7 Hz), 120.29, 116.93, 115.75, 113.95, 112.69 (d, *J* = 22.6 Hz), 111.14, 104.85 (t, *J* = 27 Hz), 48.36, 45.74, 31.83. HRMS (ESI) calculated for C<sub>25</sub>H<sub>24</sub>F<sub>2</sub>N<sub>5</sub>O<sub>3</sub> [M + H]<sup>+</sup>: 480.1842, found: 480.1842.

N<sup>1</sup>-(2-(2-amino-2-oxoethyl)phenyl)-2-((1-(2,4-difluorobenzoyl)piperidin-4-yl)amino)terephthalamide (**C3**). Yellow solid, m.p. 239-241°C. Yield: 68.6%. <sup>1</sup>H NMR (600 MHz, DMSO-*d*<sub>6</sub>) δ 11.12 (s, 1H), 8.03 (s, 1H), 7.99 (d, *J* = 7.9 Hz, 1H), 7.92 (d, *J* = 2.6 Hz, 1H), 7.84 (d, *J* = 8.2 Hz, 1H), 7.78 (d, *J* = 7.4 Hz, 1H), 7.53 (q, *J* = 7.6 Hz, 1H), 7.48 (s, 1H), 7.36 (td, *J* = 9.7, 2.5 Hz, 1H), 7.32 (d, *J* = 2.5 Hz, 1H), 7.30-7.27 (m, 3H), 7.21-7.12 (m, 2H), 7.09 (dd, *J* = 8.2, 1.6 Hz, 1H), 4.32 (d, *J* = 13.1 Hz, 1H), 3.84 (d, *J* = 8.6 Hz, 1H), 3.54 (s, 2H), 3.41 (d, *J* = 14.0 Hz, 1H), 3.26 (t, *J* = 11.9 Hz, 1H), 3.23-3.15 (m, 1H), 2.10 (d, *J* = 10.6 Hz, 1H), 2.00-1.88 (m, 1H), 1.39 (d, *J* = 12.0 Hz, 2H). <sup>13</sup>C NMR (151 MHz, DMSO-*d*<sub>6</sub>) δ 174.77, 168.08, 167.73, 163.07 (d, *J* = 243 Hz), 163.60, 158.49 (d, *J* = 256.5 Hz), 148.95, 138.61, 137.54, 130.93, 130.74 (q, *J* = 6 Hz), 129.54, 129.08, 127.56, 125.27, 124.90, 121.42 (d, *J* = 18 Hz) 116.97, 113.95, 112.68 (d, *J* = 21.75 Hz), 111.30, 104.85 (t, *J* = 27 Hz), 48.22, 45.71, 32.55, 31.85. HRMS (ESI) calculated for C<sub>28</sub>H<sub>28</sub>F<sub>2</sub>N<sub>5</sub>O<sub>4</sub> [M + H]<sup>+</sup>: 536.2104, found: 536.2104.

N<sup>1</sup>-(3-(2-amino-2-oxoethyl)phenyl)-2-((1-(2,4-difluorobenzoyl)piperidin-4-yl)amino)terephthalamide (**C4**). Yellow solid, m.p. 201-203°C. Yield: 69.1%. <sup>1</sup>H NMR (600 MHz, DMSO-*d*<sub>6</sub>) δ 10.17 (s, 1H), 8.03 (s, 1H), 7.76 (d, *J* = 8.1 Hz, 1H), 7.63 (s, 1H), 7.54 (t, *J*

= 10.8 Hz, 3H), 7.47 (d,  $J = 16.0$  Hz, 2H), 7.36 (td,  $J = 9.7, 2.4$  Hz, 1H), 7.28-7.24 (m, 2H), 7.17 (td,  $J = 8.5, 2.4$  Hz, 1H), 7.12 (d,  $J = 8.1$  Hz, 1H), 7.01 (d,  $J = 7.5$  Hz, 1H), 6.89 (s, 1H), 4.34 (d,  $J = 13.1$  Hz, 1H), 3.82 (d,  $J = 10.1$  Hz, 1H), 3.37 (s, 2H), 3.25 (t,  $J = 12.1$  Hz, 1H), 3.18-3.11 (m, 1H), 2.09 (d,  $J = 12.6$  Hz, 1H), 1.99 (s, 1H), 1.94 (s, 1H), 1.44-1.32 (m, 2H).  $^{13}\text{C}$  NMR (151 MHz, DMSO- $d_6$ )  $\delta$  172.59, 168.10 (d,  $J = 2.8$  Hz), 163.59, 163.07 (d,  $J = 248.5$  Hz), 158.48 (d,  $J = 247.8$  Hz), 148.37, 139.15, 138.38, 137.34, 130.74 (q,  $J = 6.1$  Hz), 129.84, 128.71, 125.18, 122.04, 121.42 (d,  $J = 2.8$  Hz), 119.48, 117.94, 113.89, 112.68 (d,  $J = 21.75$  Hz), 110.98, 104.84 (t,  $J = 27$  Hz), 56.49, 48.32, 42.77, 19.03. HRMS (ESI) calculated for  $\text{C}_{28}\text{H}_{28}\text{F}_2\text{N}_5\text{O}_4$   $[\text{M} + \text{H}]^+$ : 536.2104, found: 536.2105.

$\text{N}^1$ -benzyl-2-((1-(2,4-difluorobenzoyl)piperidin-4-yl)amino)terephthalamide (**C5**). Yellow solid, m.p. 274-176°C. Yield: 81.6%.  $^1\text{H}$  NMR (600 MHz, DMSO- $d_6$ )  $\delta$  9.03 (t,  $J = 6.0$  Hz, 1H), 8.05-7.97 (m, 2H), 7.71 (d,  $J = 8.2$  Hz, 1H), 7.56-7.50 (m, 1H), 7.43 (s, 1H), 7.36 (td,  $J = 9.9, 2.7$  Hz, 1H), 7.33 (d,  $J = 6.3$  Hz, 4H), 7.27-7.22 (m, 2H), 7.18 (td,  $J = 8.5, 2.4$  Hz, 1H), 7.06 (d,  $J = 8.0$  Hz, 1H), 4.44 (d,  $J = 5.9$  Hz, 2H), 4.29 (d,  $J = 13.0$  Hz, 1H), 3.82-3.74 (m, 1H), 3.39 (d,  $J = 14.1$  Hz, 1H), 3.27-3.15 (m, 2H), 2.13-2.03 (m, 1H), 1.97-1.86 (m, 1H), 1.39-1.29 (m, 2H).  $^{13}\text{C}$  NMR (151 MHz, DMSO- $d_6$ )  $\delta$  169.12, 168.13, 163.58, 163.08 (d,  $J = 248.5$  Hz), 158.49 (d,  $J = 247.8$  Hz), 148.52, 140.06, 130.71 (q,  $J = 6$  Hz), 129.04, 128.75, 127.62, 127.20, 121.43 (d,  $J = 18.5$  Hz), 117.04, 113.79, 112.68 (d,  $J = 21.75$  Hz), 111.06, 104.85 (t,  $J = 25.9$  Hz), 48.18, 45.70, 42.78, 31.87. HRMS (ESI) calculated for  $\text{C}_{27}\text{H}_{27}\text{F}_2\text{N}_4\text{O}_3$   $[\text{M} + \text{H}]^+$ : 493.2046, found: 493.2046.

2-((1-(2,4-difluorobenzoyl)piperidin-4-yl)amino)- $\text{N}^1$ -(2-(methylsulfonamido)phenyl)terephthalamide (**C6**). Yellow solid, m.p. 214-216°C. Yield: 46.8%.  $^1\text{H}$  NMR (600 MHz, DMSO- $d_6$ )  $\delta$  9.75 (s, 1H), 9.18 (s, 1H), 8.09 (s, 1H), 7.85 (d,  $J = 8.2$  Hz, 1H), 7.78-7.68 (m, 2H), 7.57 (d,  $J = 7.7$  Hz, 1H), 7.53 (s, 1H), 7.49 (dd,  $J = 7.8, 1.8$  Hz, 1H), 7.41 (td,  $J = 9.7, 2.5$  Hz, 1H), 7.38-7.31 (m, 3H), 7.23 (td,  $J = 8.5, 2.5$  Hz, 1H), 7.19 (dd,  $J = 8.2, 1.6$  Hz, 1H), 4.35 (d,  $J = 13.1$  Hz, 1H), 3.88 (s, 1H), 3.46 (s, 1H), 3.30 (t,  $J = 12.1$  Hz, 1H), 3.23 (t,  $J = 12.0$  Hz, 1H), 2.13 (d,  $J = 12.6$  Hz, 1H), 1.98 (s, 1H), 1.48-1.36 (m, 2H).  $^{13}\text{C}$  NMR (151 MHz, DMSO- $d_6$ )  $\delta$  168.24, 168.00, 163.58, 163.07 (d,  $J = 248.5$  Hz), 158.19 (d,  $J = 256.5$  Hz), 148.67, 138.76, 132.78, 130.93, 130.74 (q,  $J = 6$  Hz), 129.50, 126.84, 126.68, 126.58, 126.28, 121.42 (d,  $J = 18.4$  Hz), 116.97, 113.96, 112.68 (d,  $J = 24.0$  Hz), 111.29, 104.85 (t,  $J = 27$  Hz), 48.26, 45.70, 32.50, 31.80. HRMS (ESI) calculated for  $\text{C}_{27}\text{H}_{26}\text{F}_2\text{N}_5\text{O}_5$   $[\text{M} - \text{H}]^-$ : 570.1628, found: 570.1632.

2-(2-(4-carbamoyl-2-((1-(2,4-difluorobenzoyl)piperidin-4-yl)amino)benzamido)phenyl)acetic acid (**C7**). Yellow solid, m.p. 244-246°C. Yield: 39.5%.  $^1\text{H}$  NMR (600 MHz, DMSO- $d_6$ )  $\delta$  12.35 (s, 1H), 9.95 (s, 1H), 8.01 (s, 1H), 7.77 (d,  $J = 8.2$  Hz, 1H), 7.72 (s, 1H), 7.52 (q,  $J = 7.7$  Hz, 1H), 7.45 (s, 1H), 7.39-7.28 (m, 4H), 7.26 (d,  $J = 1.7$  Hz, 1H), 7.17 (td,  $J = 8.5, 2.5$  Hz, 1H), 7.09 (dd,  $J = 8.1, 1.6$  Hz, 1H), 4.30 (d,  $J = 13.1$  Hz, 1H), 3.81 (s, 1H), 3.62 (s, 2H), 3.40

(s, 1H), 3.24 (t,  $J = 12.0$  Hz, 1H), 3.21 – 3.14 (m, 1H), 2.07 (d,  $J = 12.7$  Hz, 1H), 1.92 (s, 1H), 1.42-1.31 (m, 2H).  $^{13}\text{C}$  NMR (151 MHz, DMSO- $d_6$ )  $\delta$  168.26, 167.82, 163.61, 163.07 (d,  $J = 248.6$  Hz), 158.48 (d,  $J = 248.1$  Hz), 148.94, 138.28, 137.75, 131.29, 130.84, 130.74 (q,  $J = 6$  Hz), 129.57, 126.58, 124.74, 124.67, 121.40 (d,  $J = 18.9$  Hz), 117.42, 113.97, 112.69 (d,  $J = 21.2$  Hz), 111.07, 104.84 (t,  $J = 25.9$  Hz), 55.37, 48.18, 45.71, 31.87. HRMS (ESI) calculated for  $\text{C}_{28}\text{H}_{25}\text{F}_2\text{N}_4\text{O}_5$   $[\text{M} - \text{H}]^-$ : 535.1798, found: 535.1798.

$N^1$ -butyl-2-((1-(2,4-difluorobenzoyl)piperidin-4-yl)amino)terephthalamide (**C8**). Yellow solid, m.p. 174-176°C. Yield: 75.6%.  $^1\text{H}$  NMR (600 MHz, DMSO- $d_6$ )  $\delta$  8.40 (t,  $J = 5.7$  Hz, 1H), 7.97 (d,  $J = 9.8$  Hz, 2H), 7.59 (d,  $J = 8.2$  Hz, 1H), 7.55-7.50 (m, 1H), 7.40 (s, 1H), 7.38-7.33 (m, 1H), 7.21-7.15 (m, 2H), 7.04 (dd,  $J = 8.1, 1.6$  Hz, 1H), 4.29 (d,  $J = 13.1$  Hz, 1H), 3.80-3.72 (m, 1H), 3.42-3.37 (m, 1H), 3.27-3.14 (m, 4H), 2.06 (d,  $J = 8.9$  Hz, 1H), 1.92 (d,  $J = 12.2$  Hz, 1H), 1.52-1.46 (m, 2H), 1.38-1.29 (m, 4H), 0.90 (t,  $J = 7.4$  Hz, 3H).  $^{13}\text{C}$  NMR (151 MHz, DMSO- $d_6$ )  $\delta$  169.01, 168.19, 163.59, 163.08 (d,  $J = 248.5$  Hz), 158.49 (d,  $J = 247.7$  Hz), 148.31, 137.90, 130.71 (q,  $J = 9.9$  Hz), 128.94, 121.43 (d,  $J = 18.4$  Hz), 117.67, 113.75, 112.69 (d,  $J = 21.5$  Hz), 110.93, 104.84 (t,  $J = 25.9$  Hz), 48.15, 45.70, 32.58, 31.87, 31.58, 20.15, 14.18. HRMS (ESI) calculated for  $\text{C}_{24}\text{H}_{29}\text{F}_2\text{N}_4\text{O}_3$   $[\text{M} + \text{H}]^+$ : 459.2202, found: 459.2202.

2-((1-(2,4-difluorobenzoyl)piperidin-4-yl)amino)- $N^1$ -(1,3,4-thiadiazol-2-yl)terephthalamide (**C9**). Yellow solid, m.p. 284-286°C. Yield: 40.8%.  $^1\text{H}$  NMR (600 MHz, DMSO- $d_6$ )  $\delta$  12.85 (s, 1H), 9.23 (s, 1H), 8.20 (s, 1H), 8.02 (s, 1H), 7.69 (s, 1H), 7.55 (s, 1H), 7.49 (s, 1H), 7.39-7.34 (m, 2H), 7.18 (td,  $J = 8.5, 2.5$  Hz, 1H), 7.10 (dd,  $J = 8.1, 1.6$  Hz, 1H), 4.38 (d,  $J = 13.1$  Hz, 1H), 3.93 (s, 1H), 3.42 (d,  $J = 13.8$  Hz, 1H), 3.28 (t,  $J = 12.4$  Hz, 1H), 3.14 (t,  $J = 12.1$  Hz, 1H), 2.11 (d,  $J = 12.7$  Hz, 1H), 1.96 (s, 1H), 1.42 (s, 2H).  $^{13}\text{C}$  NMR (151 MHz, DMSO- $d_6$ )  $\delta$  174.77, 168.08, 167.73, 163.07 (d,  $J = 243$  Hz), 163.60, 158.49 (d,  $J = 256.5$  Hz), 148.95, 138.61, 137.54, 130.93, 130.74 (q,  $J = 6$  Hz), 129.54, 129.08, 127.56, 125.27, 124.90, 121.42 (d,  $J = 18$  Hz), 116.97, 113.95, 112.68 (d,  $J = 21.75$  Hz), 111.30, 104.85 (t,  $J = 10.5$  Hz), 48.22, 45.71, 32.55, 31.85. HRMS (ESI) calculated for  $\text{C}_{22}\text{H}_{21}\text{F}_2\text{N}_6\text{O}_3\text{S}$   $[\text{M} + \text{H}]^+$ : 485.1213, found: 485.1211.

2-((1-(4-chloro-2,6-difluorobenzoyl)piperidin-4-yl)amino)- $N^1$ -(2-(methylsulfonamido)phenyl)terephthalamide (**C10**). White solid, m.p. 244-246°C. Yield: 69.4%.  $^1\text{H}$  NMR (600 MHz, DMSO- $d_6$ )  $\delta$  9.70 (s, 1H), 9.13 (s, 1H), 8.03 (s, 1H), 7.80 (d,  $J = 8.2$  Hz, 1H), 7.71-7.65 (m, 2H), 7.54-7.50 (m, 2H), 7.48 (s, 1H), 7.43 (dd,  $J = 7.6, 1.8$  Hz, 1H), 7.31-7.23 (m, 3H), 7.14 (dd,  $J = 8.2, 1.5$  Hz, 1H), 4.31 (d,  $J = 13.4$  Hz, 1H), 3.84 (d,  $J = 9.8$  Hz, 1H), 3.45 (d,  $J = 13.9$  Hz, 1H), 3.28 (dd,  $J = 13.8, 3.0$  Hz, 1H), 3.21 (td,  $J = 10.7, 5.5$  Hz, 1H), 2.97 (s, 3H), 2.09 (d,  $J = 10.3$  Hz, 1H), 1.96 (d,  $J = 12.9$  Hz, 1H), 1.37-1.27 (m, 2H).  $^{13}\text{C}$  NMR (151 MHz, DMSO- $d_6$ )  $\delta$  168.23, 168.13, 159.30 (q,  $J = 10.5$  Hz), 157.65 (q,  $J = 10.5$  Hz), 148.61, 138.69, 135.67 (t,  $J = 13.3$  Hz), 132.82, 130.88, 129.51, 126.95, 126.67 (d,  $J = 5.3$  Hz), 126.36, 117.07, 114.06, 113.77 (d,  $J = 24.21$  Hz), 113.39, 111.30, 48.12, 45.49, 32.75, 31.88.

HRMS (ESI) calculated for  $C_{27}H_{25}ClF_2N_5O_5S$   $[M - H]^-$ : 604.1238, found: 604.1231.

2-((1-(4-bromo-2-fluorobenzoyl)piperidin-4-yl)amino)-N<sup>1</sup>-(2-(methylsulfonamido)phenyl)terephthalamide (**C11**). Yellow solid, m.p. 169-171°C. Yield: 56.4%. <sup>1</sup>H NMR (600 MHz, DMSO-*d*<sub>6</sub>) δ 9.69 (s, 1H), 9.12 (s, 1H), 8.03 (s, 1H), 7.79 (d, *J* = 8.2 Hz, 1H), 7.70-7.65 (m, 3H), 7.52-7.47 (m, 2H), 7.43 (dd, *J* = 7.6, 1.9 Hz, 2H), 7.31-7.23 (m, 3H), 7.13 (dd, *J* = 8.1, 1.5 Hz, 1H), 4.29 (d, *J* = 13.1 Hz, 1H), 3.82 (d, *J* = 10.7 Hz, 1H), 3.38 (d, *J* = 13.9 Hz, 1H), 3.24 (t, *J* = 12.3 Hz, 1H), 3.17 (t, *J* = 12.1 Hz, 1H), 2.96 (s, 3H), 2.07 (d, *J* = 12.7 Hz, 1H), 1.92 (s, 1H), 1.35 (d, *J* = 21.5 Hz, 2H). <sup>13</sup>C NMR (151 MHz, DMSO-*d*<sub>6</sub>) δ 168.19 (d, *J* = 3.4 Hz), 163.53, 158.82, 157.16, 148.63, 138.67, 132.82, 130.94, 130.71 (d, *J* = 4.5 Hz), 129.47, 128.65, 126.84, 126.56 (d, *J* = 13.6 Hz), 126.27, 124.10 (d, *J* = 18.3 Hz), 123.31 (d, *J* = 9.4 Hz), 119.73 (d, *J* = 24.9 Hz), 117.04, 114.00, 111.30, 48.23, 45.69, 32.46, 31.76. HRMS (ESI) calculated for  $C_{27}H_{26}BrFN_5O_5S$   $[M - H]^-$ : 630.0828, found: 630.0829.

2-((1-(4-chloro-2-fluorobenzoyl)piperidin-4-yl)amino)-N<sup>1</sup>-(2-(methylsulfonamido)phenyl)terephthalamide (**C12**). Yellow solid, m.p. 159-161°C. Yield: 64.3%. <sup>1</sup>H NMR (600 MHz, DMSO-*d*<sub>6</sub>) δ 10.10 (s, 1H), 9.58 (s, 1H), 8.15 (s, 1H), 7.95 (d, *J* = 8.2 Hz, 1H), 7.76 (d, *J* = 7.9 Hz, 1H), 7.66 (dd, *J* = 7.8, 1.7 Hz, 1H), 7.55 (dd, *J* = 9.4, 2.0 Hz, 1H), 7.48 (d, *J* = 15.7 Hz, 2H), 7.42 (dd, *J* = 7.8, 1.8 Hz, 1H), 7.38 (dd, *J* = 8.3, 1.9 Hz, 1H), 7.33 (d, *J* = 1.7 Hz, 1H), 7.30-7.23 (m, 2H), 7.14 (dd, *J* = 8.1, 1.6 Hz, 1H), 4.29 (dd, *J* = 12.7, 6.1 Hz, 1H), 3.90-3.84 (m, 1H), 3.26 (t, *J* = 12.1 Hz, 1H), 3.23-3.15 (m, 1H), 2.91 (s, 3H), 2.13-2.05 (m, 1H), 1.93 (t, *J* = 7.9 Hz, 1H), 1.42-1.29 (m, 2H). <sup>13</sup>C NMR (151 MHz, DMSO-*d*<sub>6</sub>) δ 168.33, 168.01, 163.38, 158.91, 157.26, 148.74, 138.67, 135.19 (d, *J* = 10.2 Hz), 132.94, 131.19, 130.51 (d, *J* = 4.9 Hz), 129.77, 126.88 (d, *J* = 13.7 Hz), 126.51 (d, *J* = 26.4 Hz), 125.75, 123.91, 123.79, 116.99 (d, *J* = 25.4 Hz), 116.78, 113.99, 111.29, 48.17, 45.69, 32.54, 31.84. HRMS (ESI) calculated for  $C_{27}H_{26}ClFN_5O_5S$   $[M - H]^-$ : 586.1333, found: 586.1327.

2-((1-(5-bromothiophene-2-carbonyl)piperidin-4-yl)amino)-N<sup>1</sup>-(2-(methylsulfonamido)phenyl)terephthalamide (**C13**). Yellow solid, m.p. 166-168°C. Yield: 65.4%. <sup>1</sup>H NMR (600 MHz, DMSO-*d*<sub>6</sub>) δ 9.70 (s, 1H), 9.12 (s, 1H), 8.05 (s, 1H), 7.79 (d, *J* = 8.2 Hz, 1H), 7.71-7.64 (m, 2H), 7.48 (s, 1H), 7.43 (dd, *J* = 7.7, 1.8 Hz, 1H), 7.30 (s, 1H), 7.29-7.22 (m, 4H), 7.14 (dd, *J* = 8.2, 1.6 Hz, 1H), 4.10 (d, *J* = 13.3 Hz, 2H), 3.84 (d, *J* = 8.9 Hz, 1H), 3.30 (s, 2H), 2.96 (s, 3H), 2.04 (dd, *J* = 13.3, 4.0 Hz, 2H), 1.43 (d, *J* = 11.1 Hz, 2H). <sup>13</sup>C NMR (151 MHz, DMSO-*d*<sub>6</sub>) δ 168.21, 168.01, 161.36, 148.67, 139.92, 138.74, 132.78, 130.98, 130.32, 129.49, 126.75, 126.59, 126.55, 126.23, 117.01, 115.77, 113.95, 111.33, 48.27, 40.90, 32.15. HRMS (ESI) calculated for  $C_{25}H_{25}BrN_5O_5S_2$   $[M - H]^-$ : 620.0465, found: 620.0451.

2-((1-(2,4-difluorobenzyl)piperidin-4-yl)amino)-N<sup>1</sup>-(2-(methylsulfonamido)phenyl)terephthalamide (**C14**). Yellow solid, m.p. 241-243°C. Yield: 57.6%. <sup>1</sup>H NMR (600 MHz, DMSO-*d*<sub>6</sub>) δ 9.70 (s, 1H), 9.17 (s, 1H), 8.04 (s, 1H), 7.78 (d, *J* = 8.2 Hz, 1H), 7.72-7.63 (m, 2H), 7.47-7.41 (m, 3H), 7.30-7.24 (m, 2H), 7.22 (d, *J* = 1.6 Hz, 1H),

7.21-7.16 (m, 1H), 7.10 (dd,  $J = 8.2, 1.6$  Hz, 1H), 7.06 (td,  $J = 8.5, 2.6$  Hz, 1H), 3.53 (s, 2H), 3.51 (s, 1H), 2.95 (s, 3H), 2.74-2.67 (m, 2H), 2.25 (d,  $J = 10.9$  Hz, 2H), 1.97-1.91 (m, 2H), 1.45-1.37 (m, 2H).  $^{13}\text{C}$  NMR (151 MHz, DMSO- $d_6$ )  $\delta$  168.23, 168.14, 162.51 (d,  $J = 57$  Hz), 160.73 (d,  $J = 104.9, 12.4$  Hz), 148.89, 138.64, 133.27 (q,  $J = 6$  Hz), 132.82, 131.07, 129.44, 126.72, 126.50 (d,  $J = 6.8$  Hz), 126.24, 121.29 (d,  $J = 18$  Hz), 116.66, 113.66, 111.67 (d,  $J = 21.2$  Hz), 111.24, 104.02 (t,  $J = 26.1$  Hz), 56.52, 54.54, 51.43, 31.99, 18.98. HRMS (ESI) calculated for  $\text{C}_{27}\text{H}_{28}\text{F}_2\text{N}_5\text{O}_4\text{S} [\text{M} - \text{H}]^-$ : 556.1836, found: 556.1836.

2-((1-(4-chloro-2,6-difluorobenzyl)piperidin-4-yl)amino)-N1-(2-(methylsulfonamido)phenyl)terephthalamide (**C15**). Yellow solid, m.p. 229-231°C. Yield: 58.4%.  $^1\text{H}$  NMR (600 MHz, DMSO- $d_6$ )  $\delta$  9.67 (s, 1H), 9.15 (s, 1H), 8.02 (s, 1H), 7.76 (d,  $J = 8.2$  Hz, 1H), 7.68-7.59 (m, 2H), 7.47-7.39 (m, 2H), 7.36 (d,  $J = 7.1$  Hz, 2H), 7.29-7.22 (m, 2H), 7.20 (d,  $J = 1.6$  Hz, 1H), 7.10 (dd,  $J = 8.1, 1.6$  Hz, 1H), 3.59 (s, 2H), 3.46 (s, 1H), 2.95 (s, 3H), 2.72 (d,  $J = 11.2$  Hz, 2H), 2.24 (t,  $J = 10.8$  Hz, 2H), 1.92 (dd,  $J = 13.3, 3.8$  Hz, 2H), 1.37 (d,  $J = 10.5$  Hz, 2H).  $^{13}\text{C}$  NMR (151 MHz, DMSO- $d_6$ )  $\delta$  168.21, 168.03, 162.61 (d,  $J = 10.3$  Hz), 160.96 (d,  $J = 10.2$  Hz), 148.87, 138.65, 133.75 (t,  $J = 13.3$  Hz), 132.77, 131.08, 129.40, 126.68, 126.48 (d,  $J = 4.8$  Hz), 126.15, 116.65, 113.67, 112.99 (d,  $J = 30.3$  Hz), 112.68, 111.19, 51.17, 48.57, 40.87, 32.02. HRMS (ESI) calculated for  $\text{C}_{27}\text{H}_{29}\text{ClF}_2\text{N}_5\text{O}_4\text{S} [\text{M} + \text{H}]^+$ : 592.1591, found: 592.1592.

2-((1-(4-bromo-2-fluorobenzyl)piperidin-4-yl)amino)-N1-(2-(methylsulfonamido)phenyl)terephthalamide (**C16**). Yellow solid, m.p. 220-222°C. Yield: 45.3%.  $^1\text{H}$  NMR (600 MHz, DMSO- $d_6$ )  $\delta$  9.76 (s, 1H), 9.18 (d,  $J = 103.4$  Hz, 1H), 8.04 (s, 1H), 7.80 (d,  $J = 8.3$  Hz, 1H), 7.72-7.64 (m, 2H), 7.50-7.48 (m, 1H), 7.45-7.41 (m, 2H), 7.40-7.37 (m, 2H), 7.29-7.23 (m, 2H), 7.22 (d,  $J = 1.7$  Hz, 1H), 7.11 (dd,  $J = 8.2, 1.6$  Hz, 1H), 3.52 (s, 2H), 3.50 (s, 1H), 2.94 (s, 3H), 2.71 (d,  $J = 11.3$  Hz, 2H), 2.24 (t,  $J = 10.7$  Hz, 2H), 1.94 (dd,  $J = 13.2, 3.8$  Hz, 2H), 1.45-1.36 (m, 2H).  $^{13}\text{C}$  NMR (151 MHz, DMSO- $d_6$ )  $\delta$  168.24, 168.03, 161.96, 160.31, 148.92, 138.67, 133.60 (d,  $J = 5.3$  Hz), 132.79, 131.25, 129.49, 127.82 (d,  $J = 3.5$  Hz), 126.47 (d,  $J = 11.2$  Hz), 126.21, 124.83 (d,  $J = 14.8$  Hz), 120.73 (d,  $J = 9.8$  Hz), 118.98 (d,  $J = 25.8$  Hz), 116.63, 113.65, 111.24, 56.50, 54.58, 51.56, 32.09, 19.03. HRMS (ESI) calculated for  $\text{C}_{27}\text{H}_{28}\text{BrFN}_5\text{O}_4\text{S} [\text{M} - \text{H}]^-$ : 618.1014, found: 618.1010.

2-((1-(4-chloro-2-fluorobenzyl)piperidin-4-yl)amino)-N1-(2-(methylsulfonamido)phenyl)terephthalamide (**C17**). Yellow solid, m.p. 168-170°C. Yield: 40.6%.  $^1\text{H}$  NMR (600 MHz, DMSO- $d_6$ )  $\delta$  9.87 (s, 1H), 8.04 (s, 1H), 7.80 (dd,  $J = 7.9, 1.6$  Hz, 1H), 7.72 (d,  $J = 8.2$  Hz, 2H), 7.48-7.40 (m, 2H), 7.38 (dd,  $J = 9.8, 2.1$  Hz, 1H), 7.34 (dd,  $J = 8.0, 1.5$  Hz, 1H), 7.26 (dd,  $J = 8.2, 2.1$  Hz, 1H), 7.21 (d,  $J = 1.7$  Hz, 1H), 7.12-7.08 (m, 2H), 7.06-6.99 (m, 1H), 3.54 (s, 2H), 3.51 (s, 1H), 2.83 (s, 3H), 2.76-2.66 (m, 2H), 2.24 (t,  $J = 10.7$  Hz, 2H), 1.95 (dd,  $J = 13.1, 3.7$  Hz, 2H), 1.47-1.36 (m, 2H).  $^{13}\text{C}$  NMR (151 MHz, DMSO- $d_6$ )  $\delta$  168.13, 167.68, 161.91, 160.27, 148.83, 138.51, 134.15, 133.26 (d,  $J = 5.4$  Hz), 132.80 (d,  $J$

= 10.5 Hz), 132.03, 129.04, 125.59, 124.91 (d,  $J = 3.3$  Hz), 124.43 (d,  $J = 15.0$  Hz), 123.85, 123.46 (d,  $J = 31.4$  Hz), 117.15, 116.21 (d,  $J = 26.0$  Hz), 113.77, 111.28, 54.54, 51.55, 32.09, 21.95, 19.01. HRMS (ESI) calculated for  $C_{27}H_{28}ClFN_5O_4S$   $[M - H]^-$ : 572.1540, found: 572.1531.

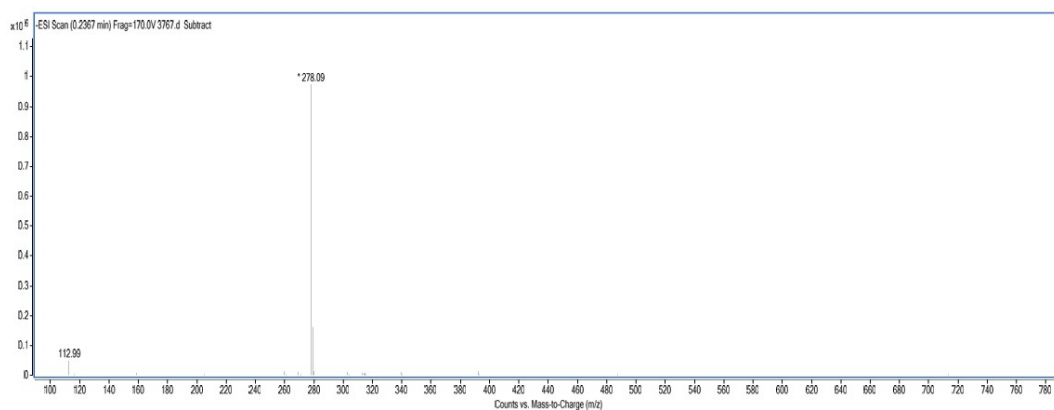

Figure 4. HRMS spectrum of compound A1

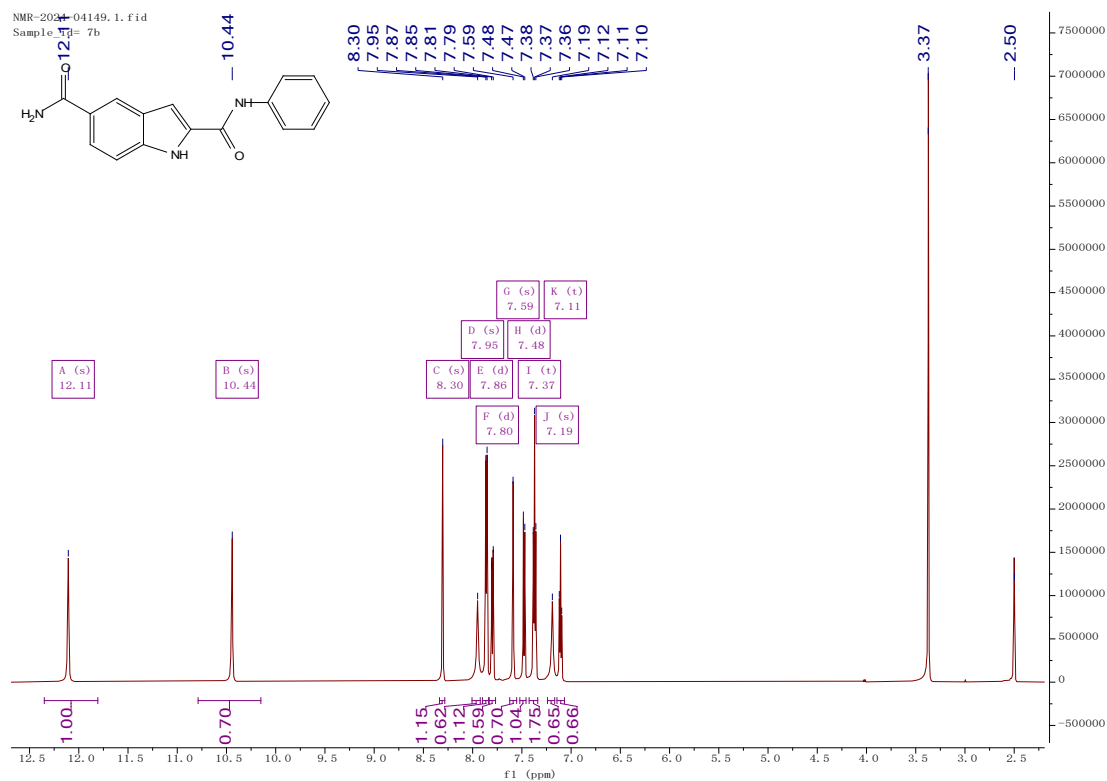

Figure 5.  $^1H$  NMR spectrum of compound A1

NMR-2025-02196.1.fid  
Sample\_id= zd-1a

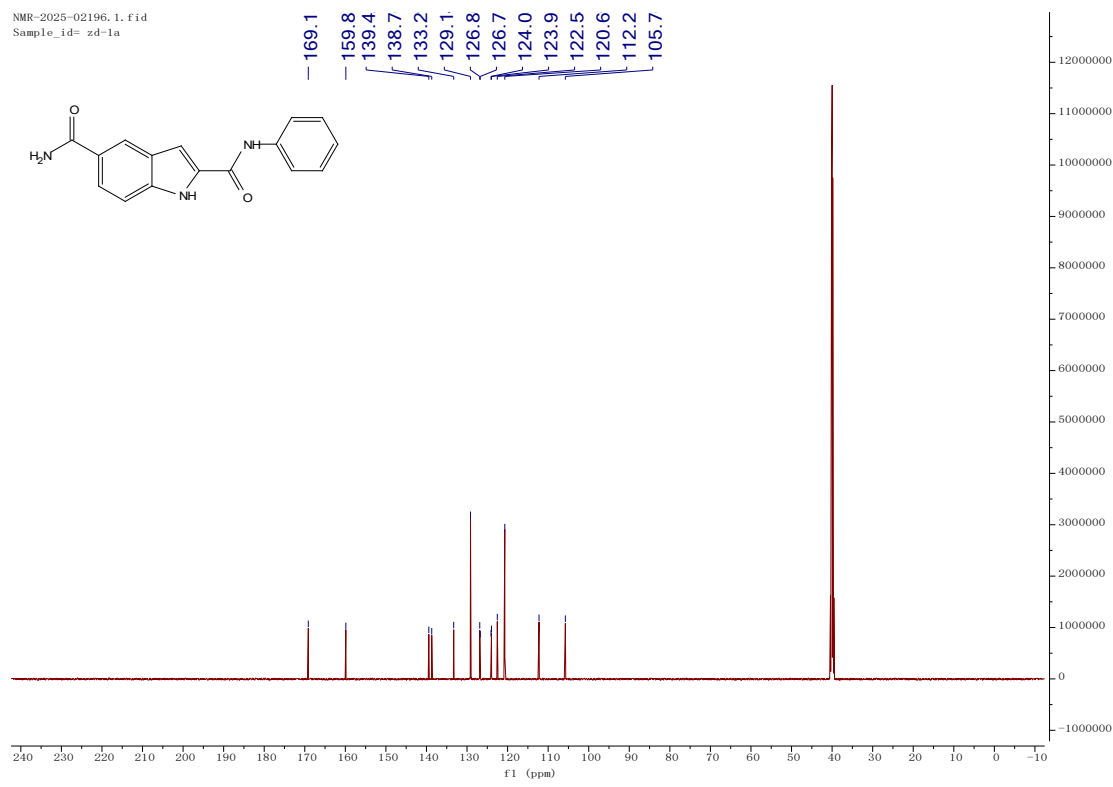

**Figure 6.**  $^{13}\text{C}$  NMR spectrum of compound A1

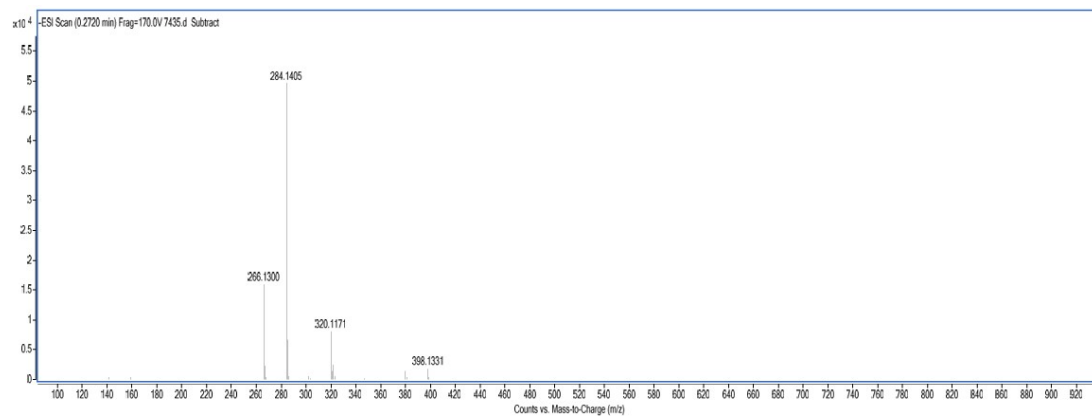

**Figure 7.** HRMS spectrum of compound A2

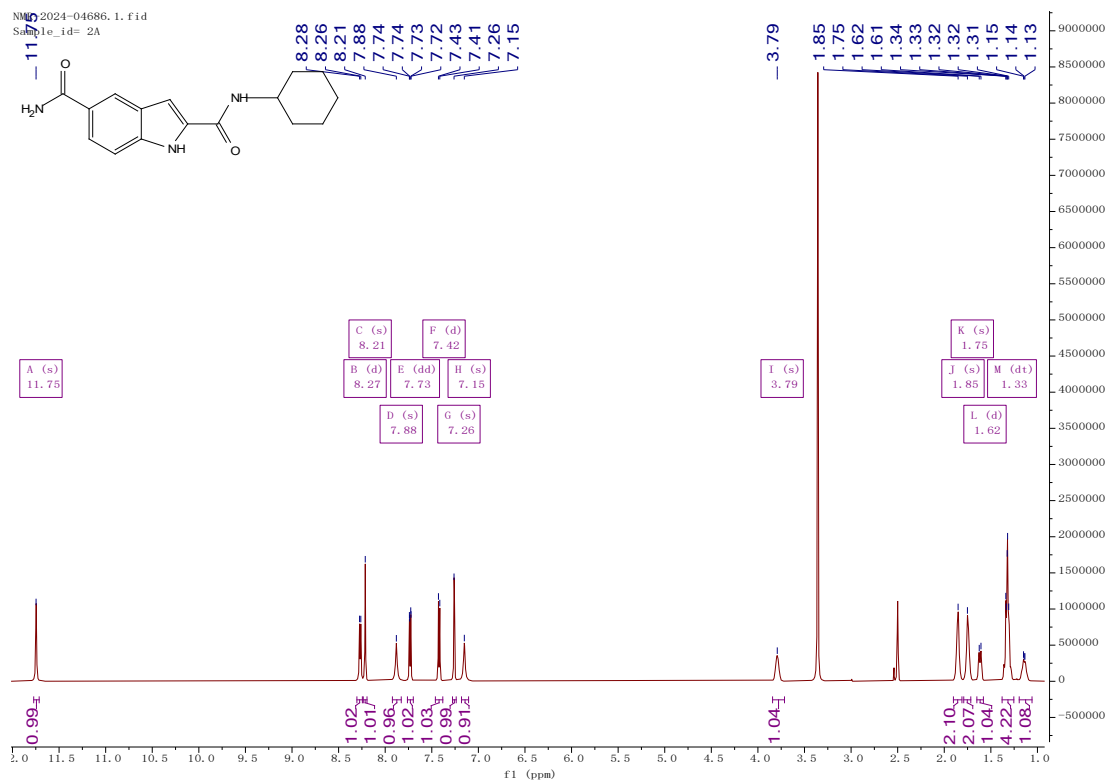

Figure 8.  $^1\text{H}$  NMR spectrum of compound A2

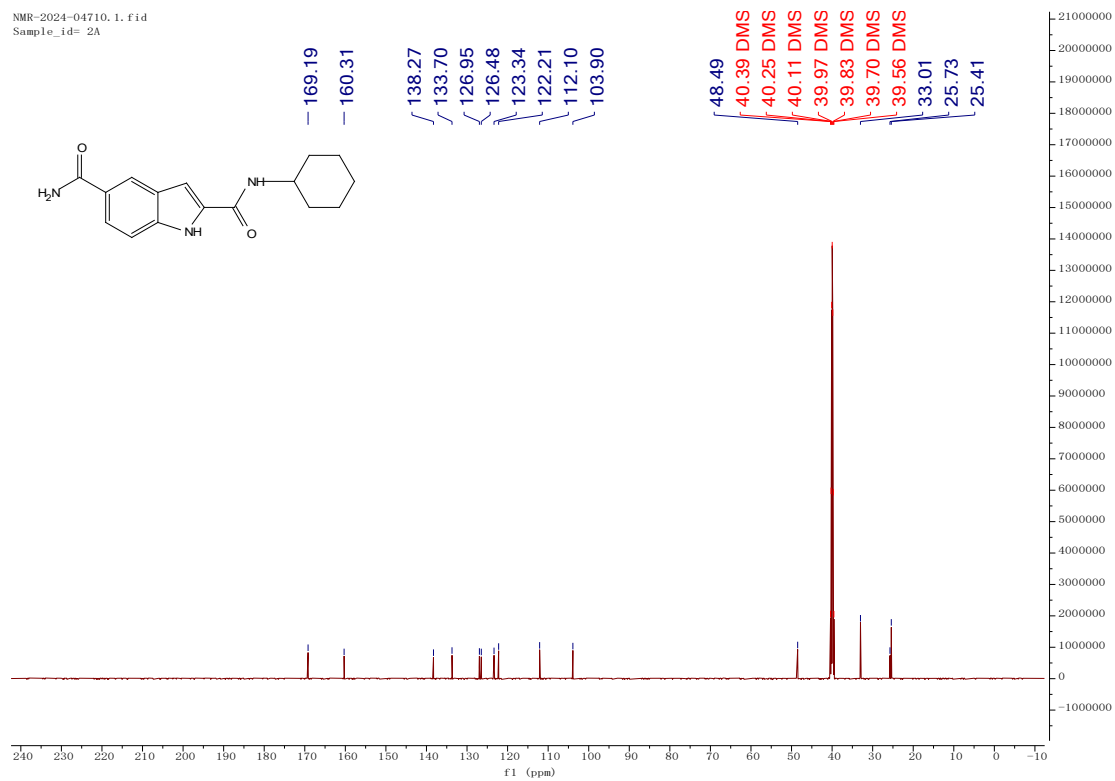

Figure 9.  $^{13}\text{C}$  NMR spectrum of compound A2

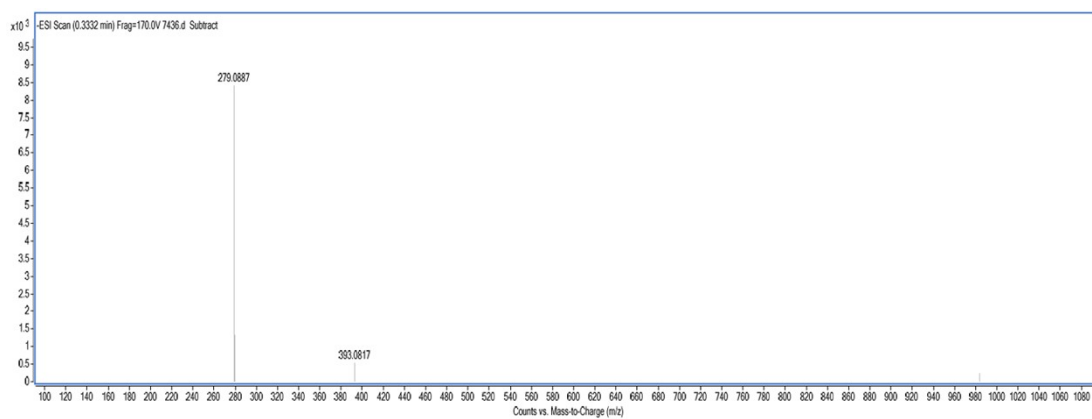

Figure 10. HRMS spectrum of compound A3

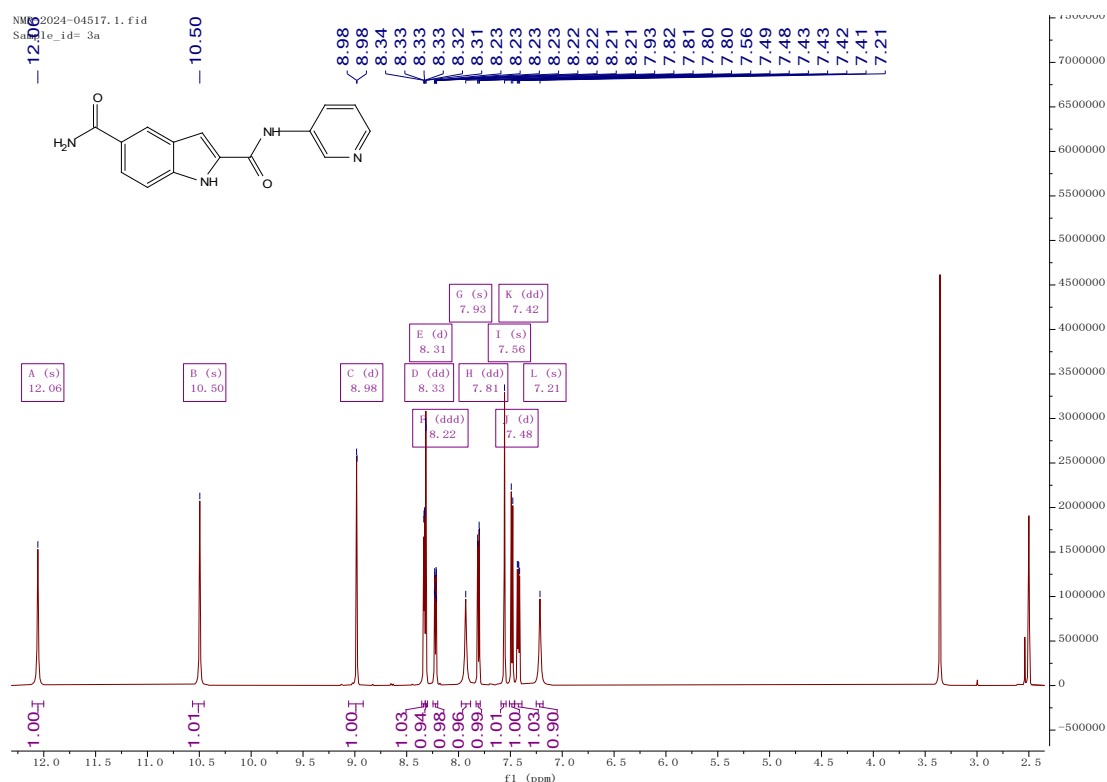

Figure 11. <sup>1</sup>H NMR spectrum of compound A3

NMR-2024-04534.1.fid  
Sample\_id= 3A

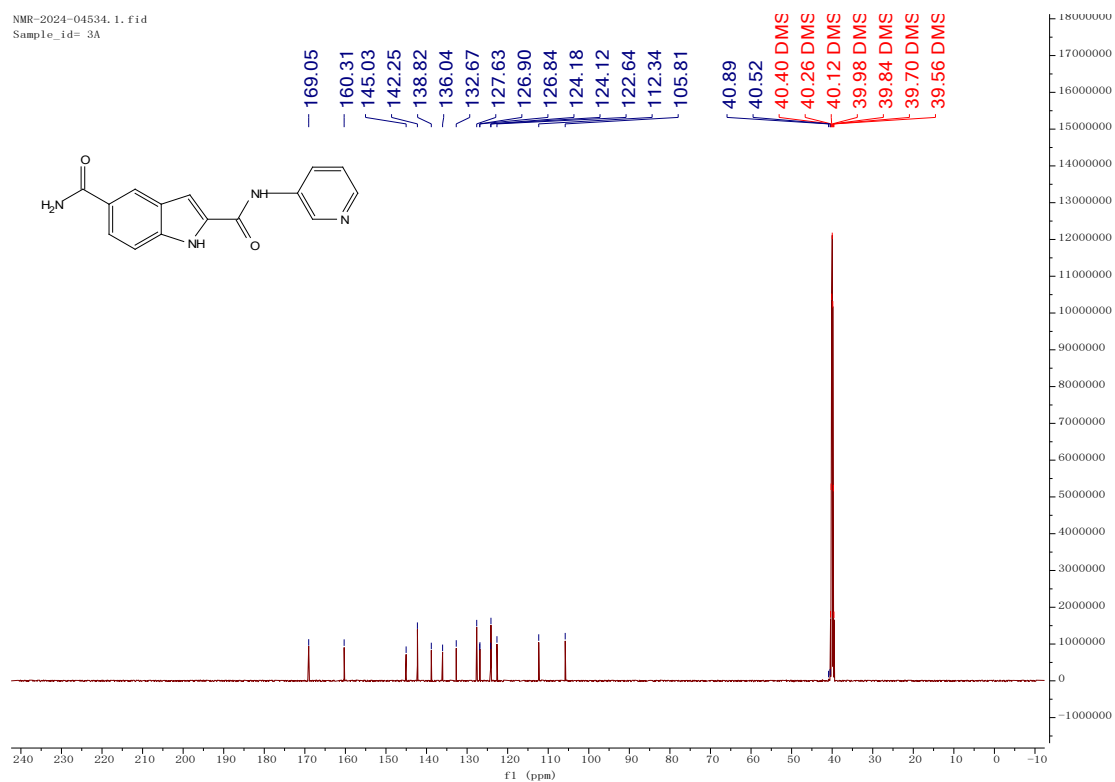

Figure 12.  $^{13}\text{C}$  NMR spectrum of compound A3

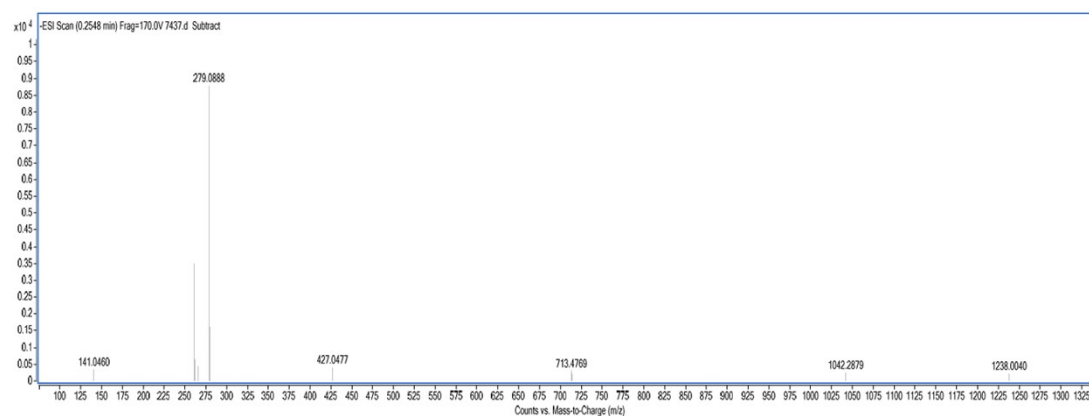

Figure 13. HRMS spectrum of compound A4

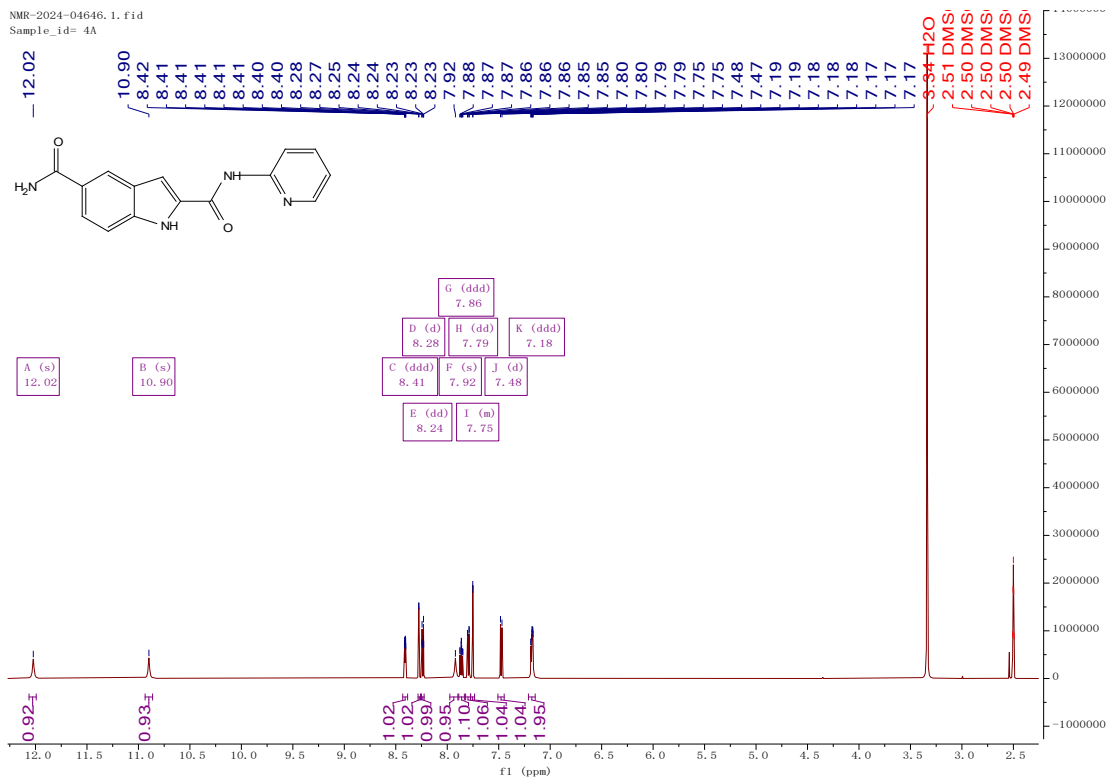

Figure 14. <sup>1</sup>H NMR spectrum of compound A4

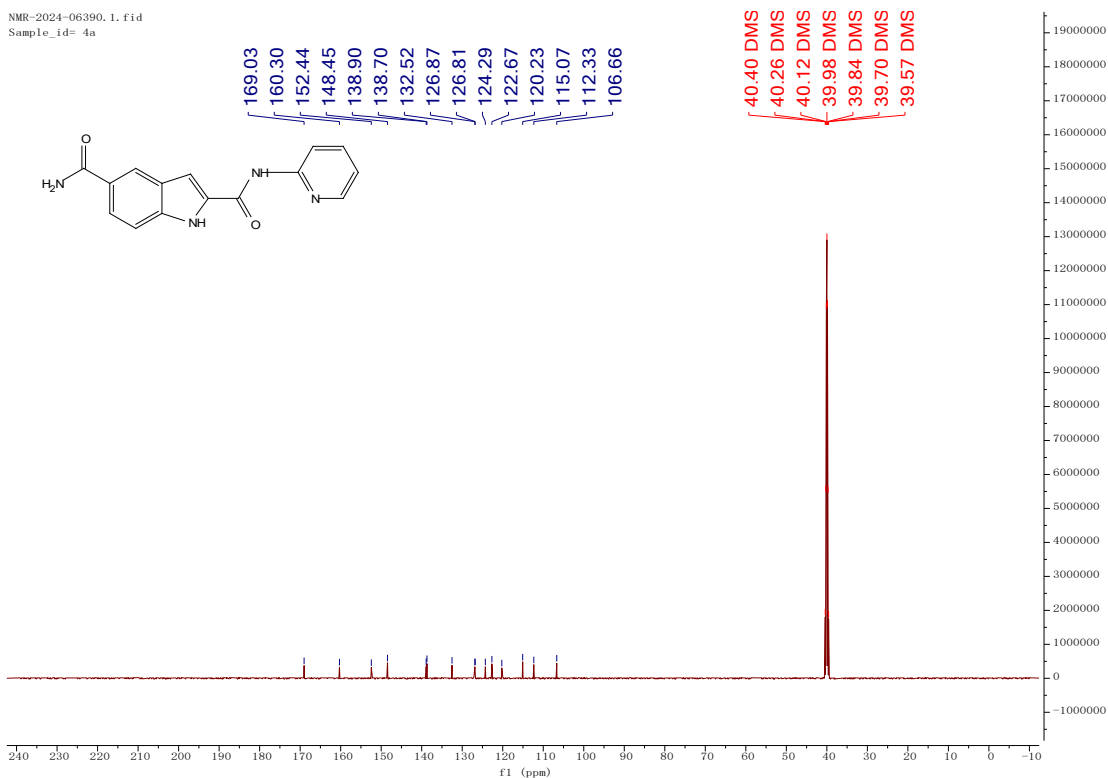

Figure 15. <sup>13</sup>C NMR spectrum of compound A4

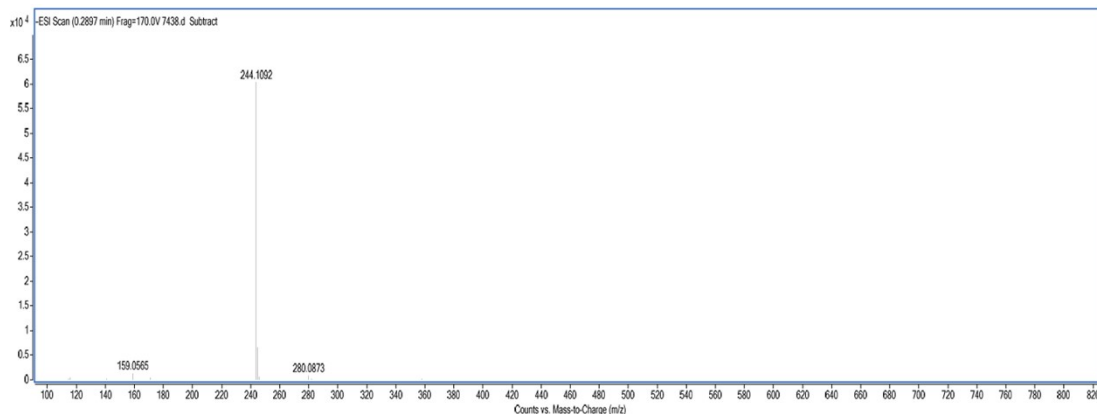

Figure 16. HRMS spectrum of compound A5

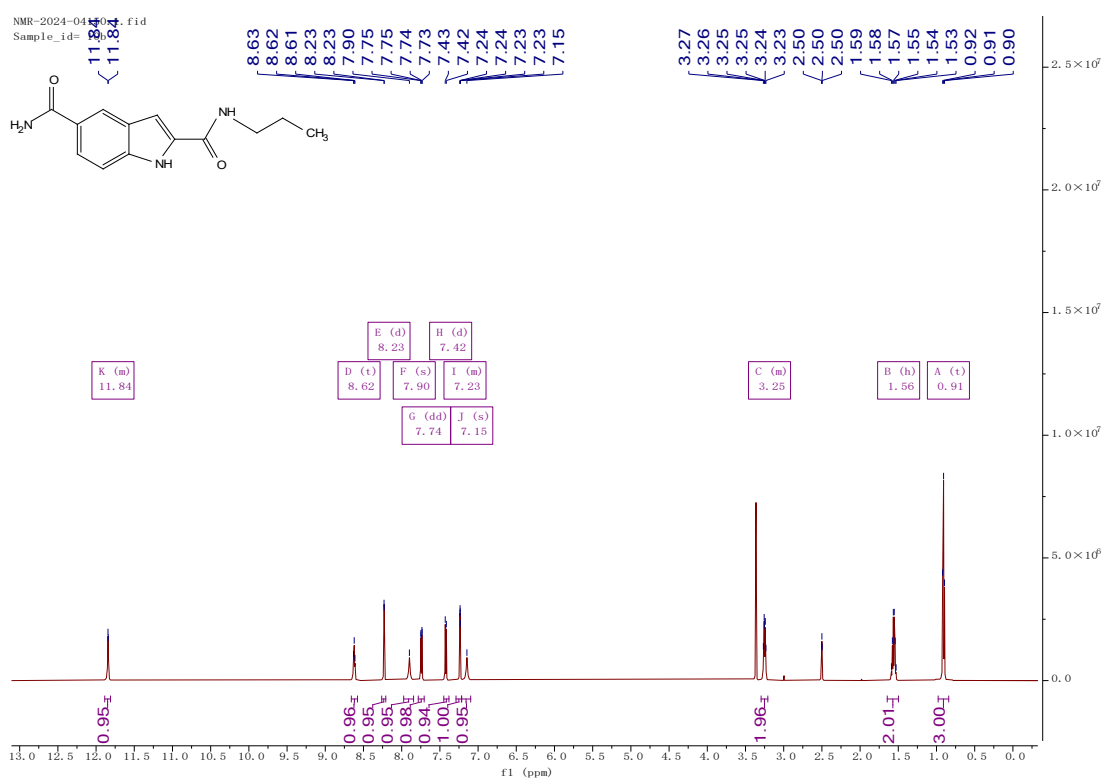

Figure 17. <sup>1</sup>H NMR spectrum of compound A5

NMR-2024-04179\_1.fid  
Sample\_id= 10b

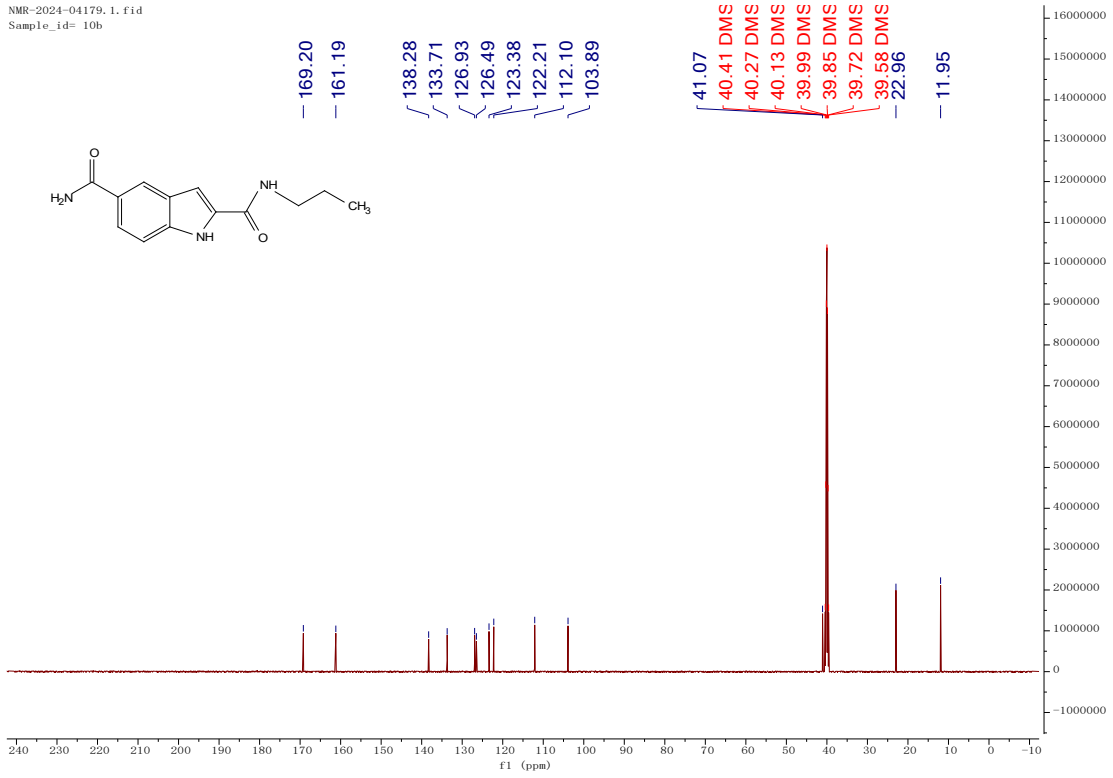

Figure 18.  $^{13}\text{C}$  NMR spectrum of compound A5

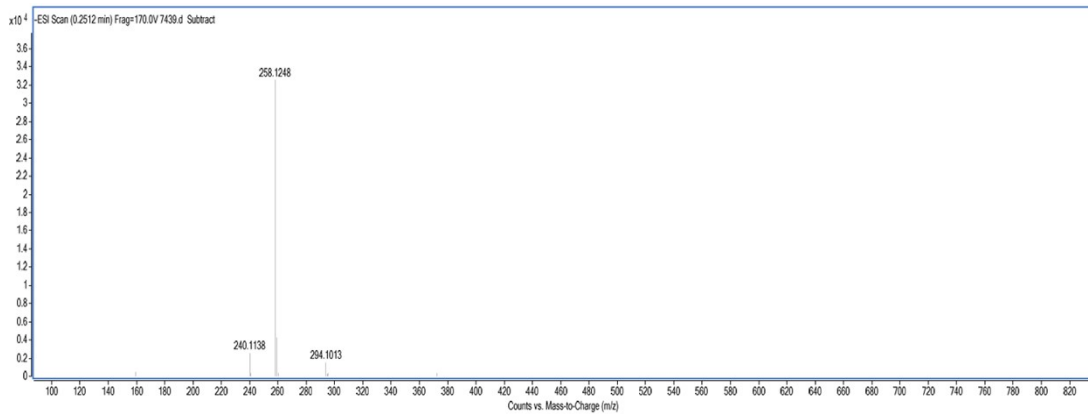

Figure 19. HRMS spectrum of compound A6

NMR-2024-04564.1.fid  
Sample\_id= 6A

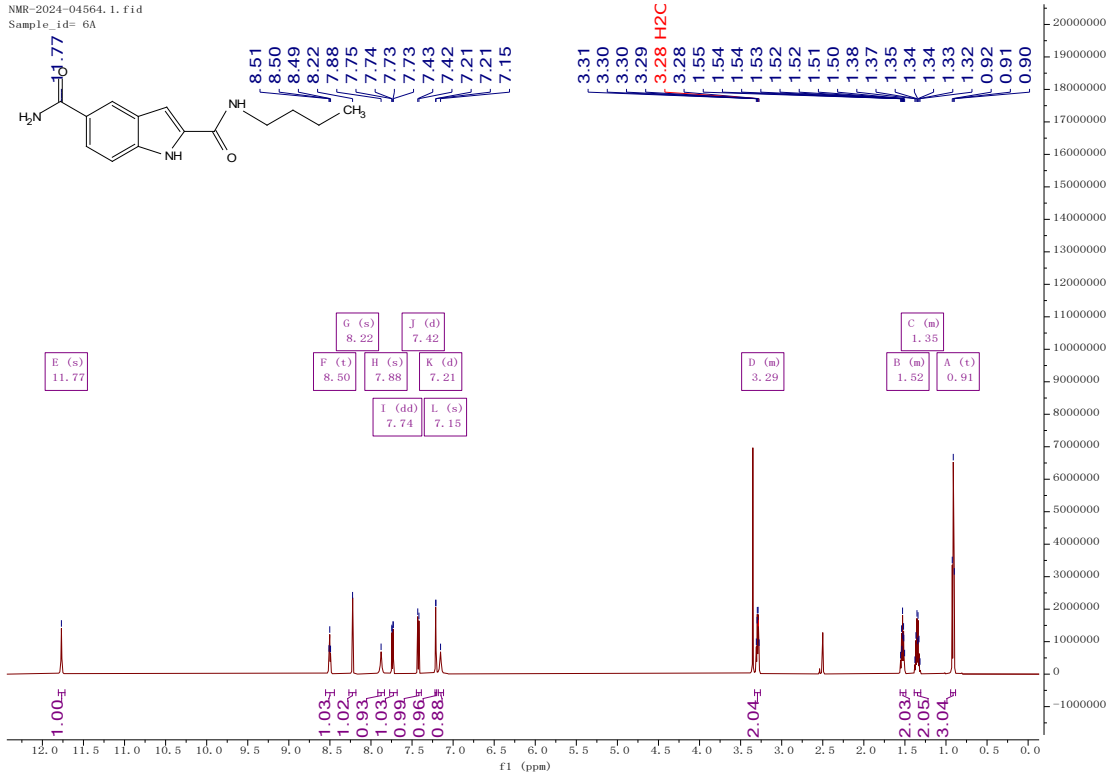

Figure 20. <sup>1</sup>H NMR spectrum of compound A6

NMR-2024-04629.1.fid  
Sample\_id= 6A

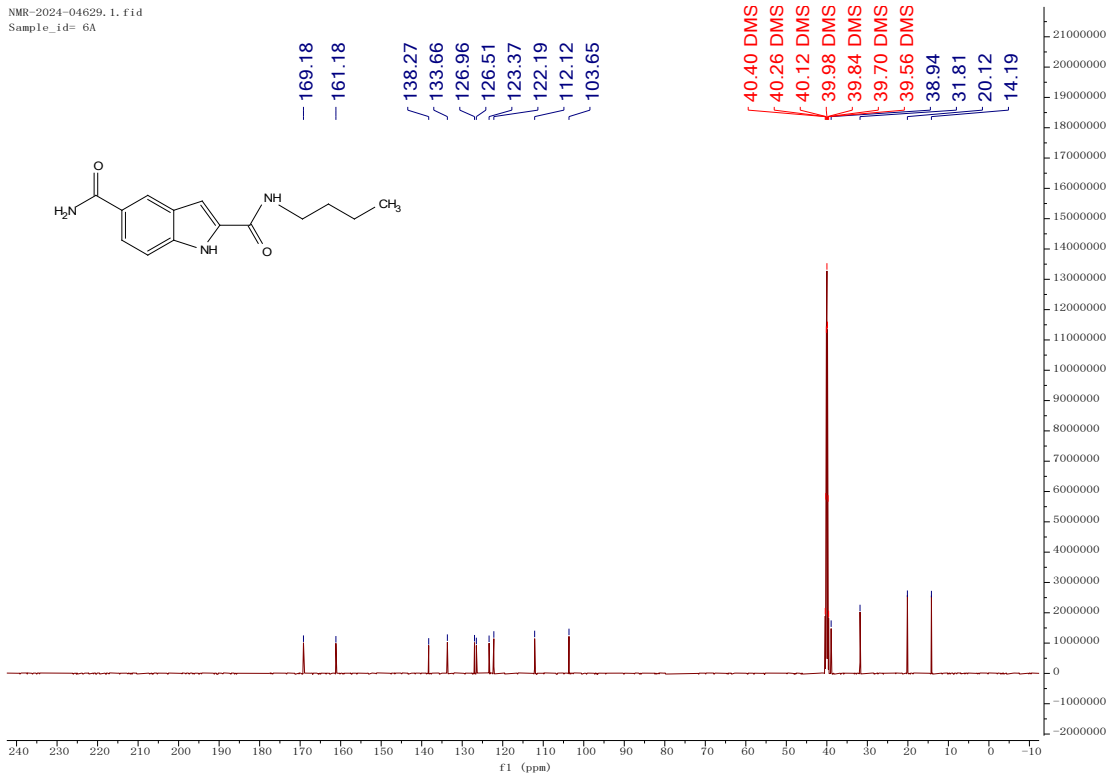

Figure 21. <sup>13</sup>C NMR spectrum of compound A6

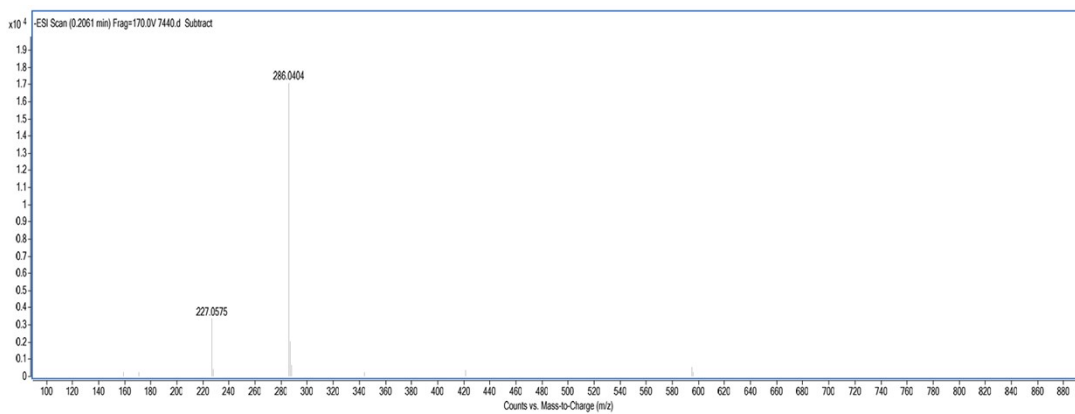

Figure 22. HRMS spectrum of compound A7

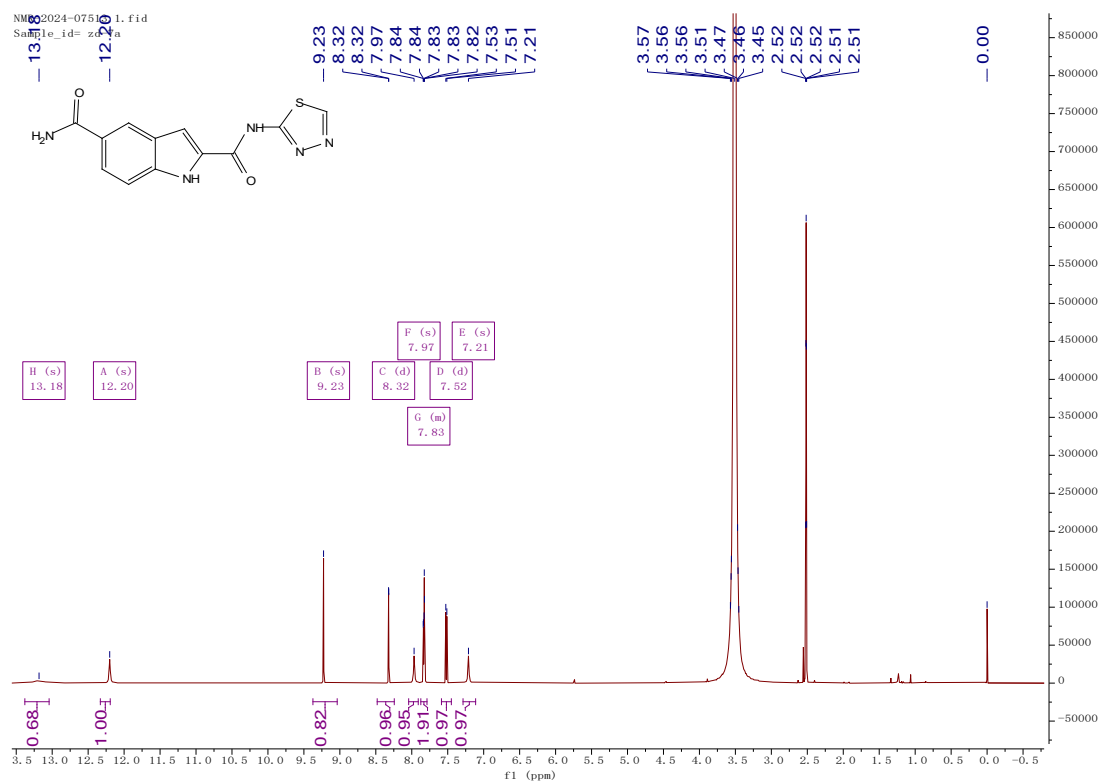

Figure 23. <sup>1</sup>H NMR spectrum of compound A7

NMR-2025-02870\_1.fid  
Sample\_id= ZD-7a

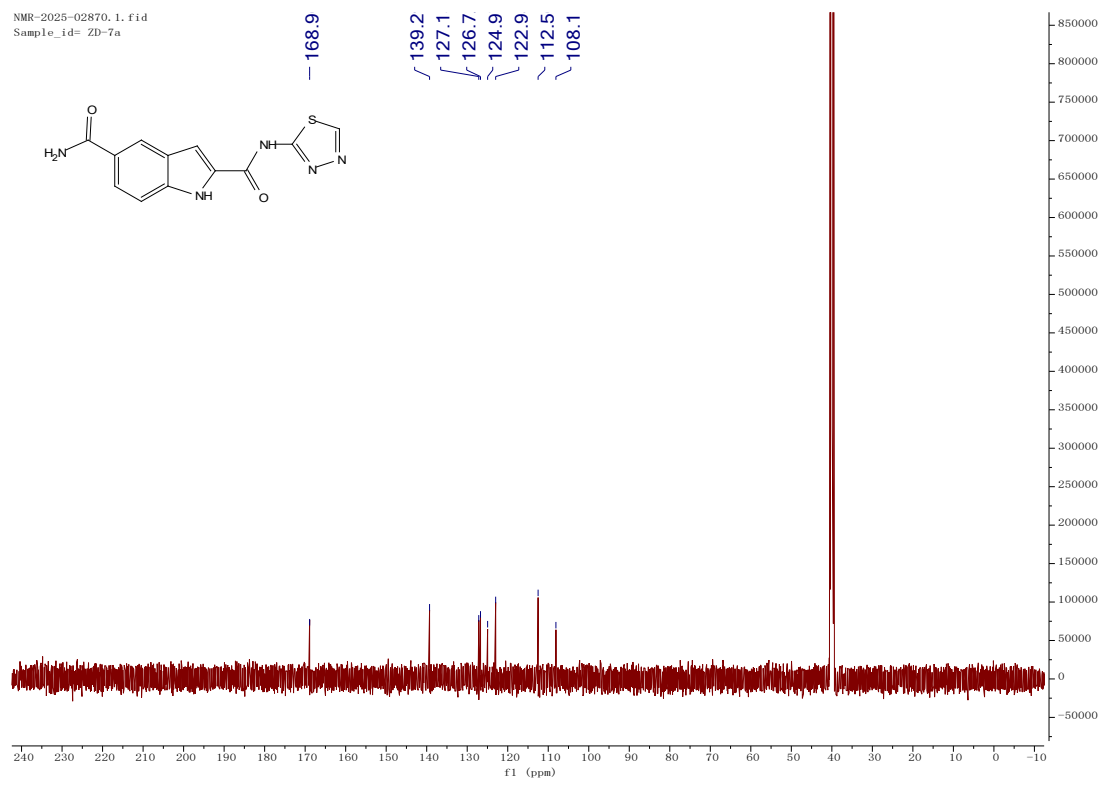

Figure 24. <sup>13</sup>C NMR spectrum of compound A7

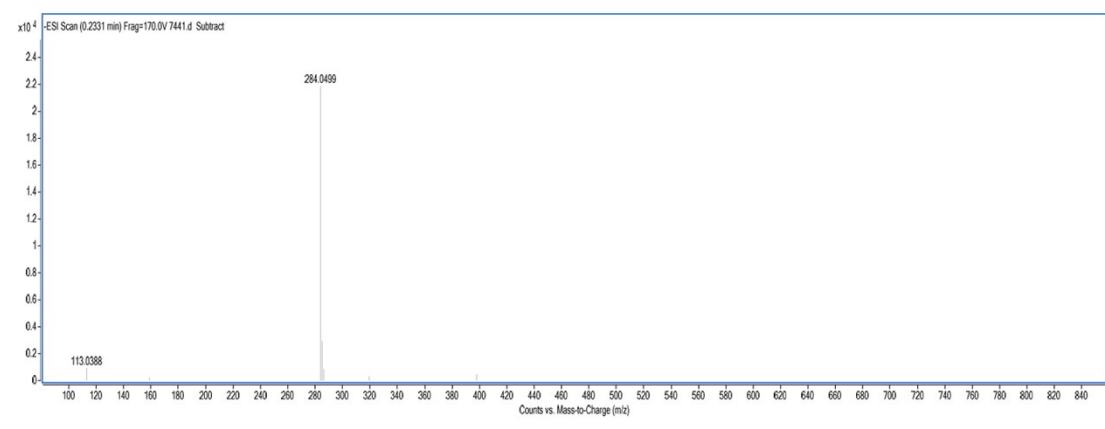

Figure 25. HRMS spectrum of compound A8

NMR-2024-04709.1.fid  
Sample\_id= 8A

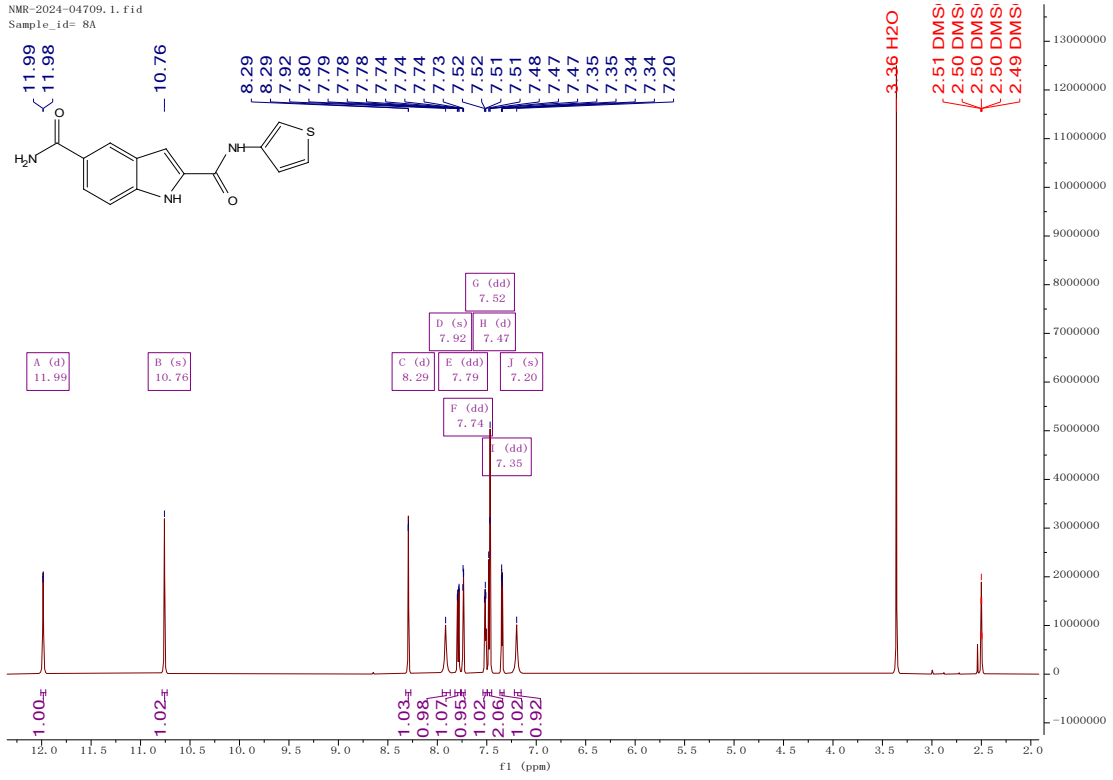

Figure 26. <sup>1</sup>H NMR spectrum of compound A8

NMR-2025-02497.1.fid  
Sample\_id= zd-8a

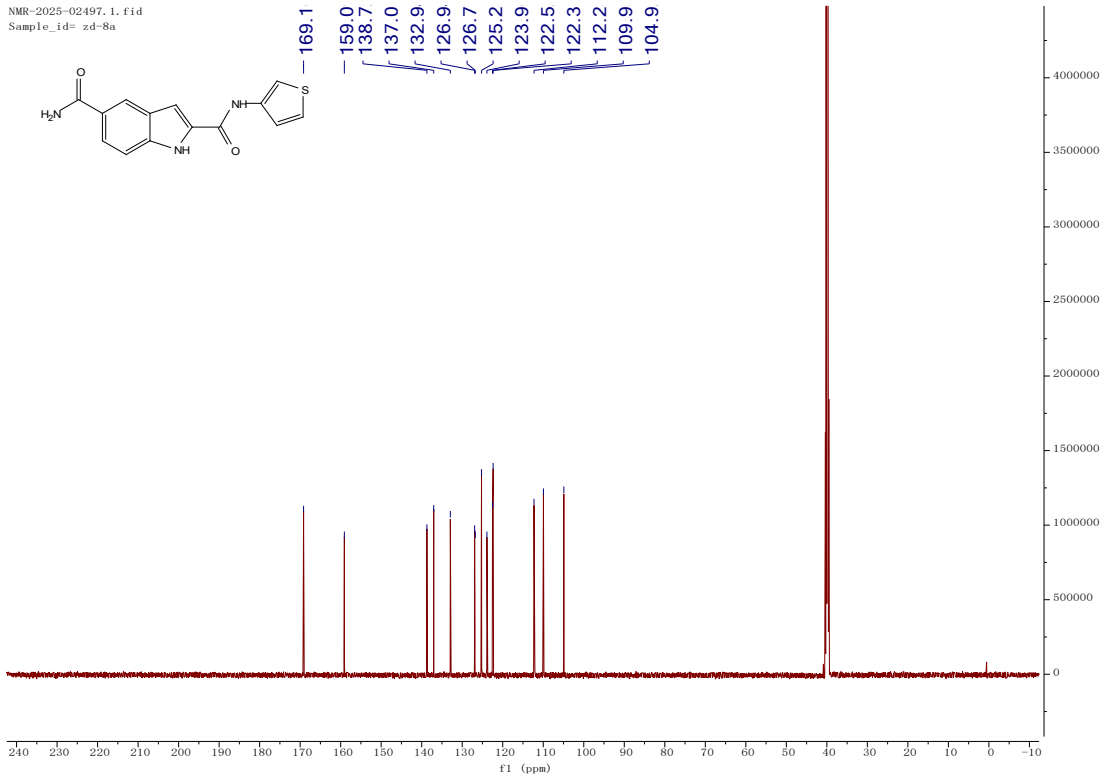

Figure 27. <sup>13</sup>C NMR spectrum of compound A8

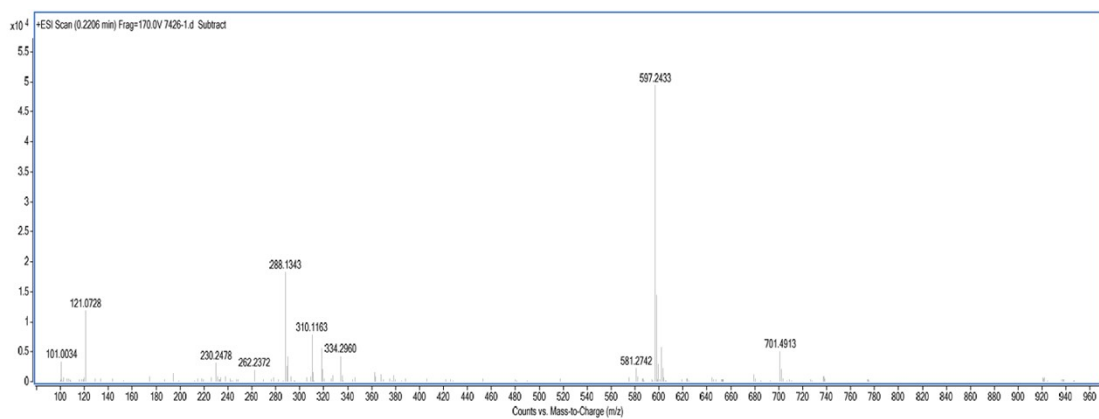

Figure 28. HRMS spectrum of compound A9

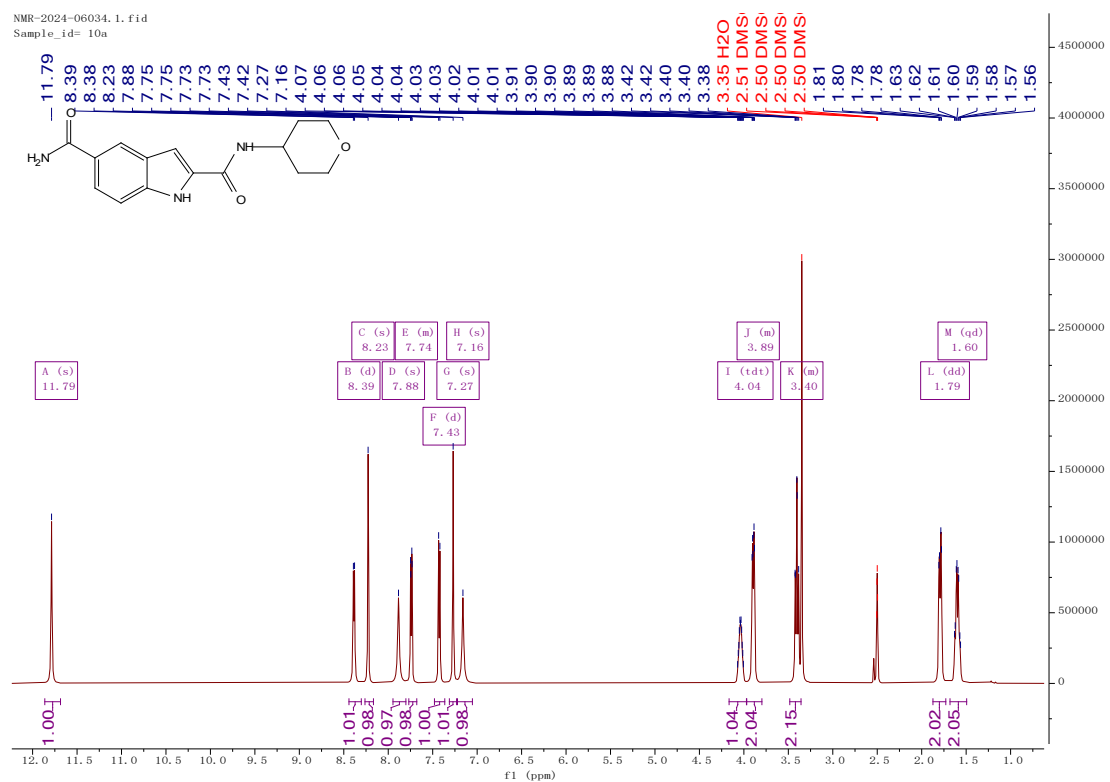

Figure 29. <sup>1</sup>H NMR spectrum of compound A9

NMR-2024-06076\_1.fid  
Sample\_id= 10A

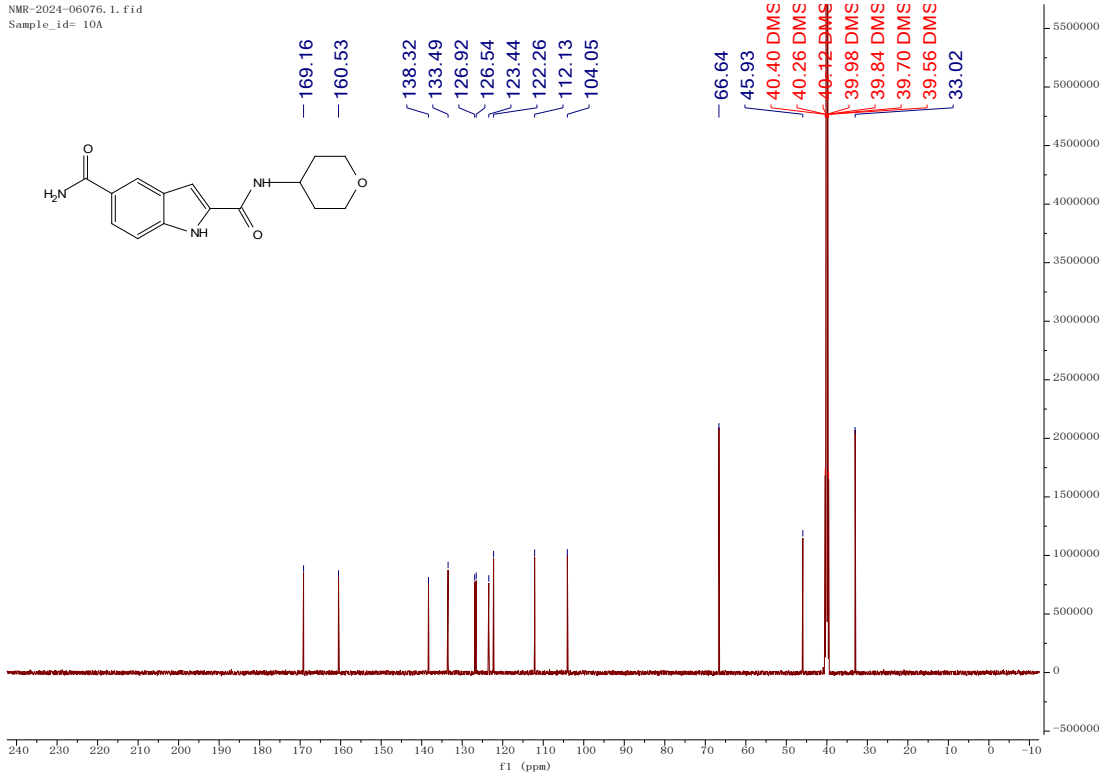

Figure 30.  $^{13}\text{C}$  NMR spectrum of compound A9

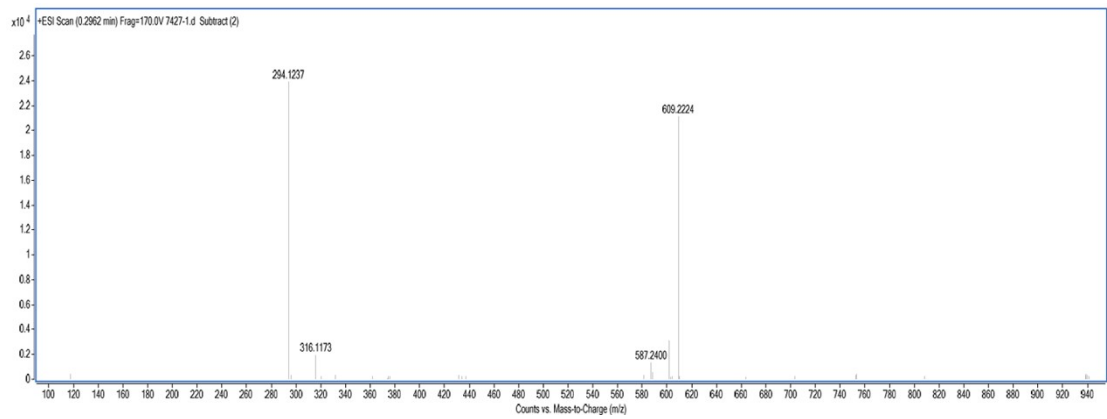

Figure 31. HRMS spectrum of compound A10

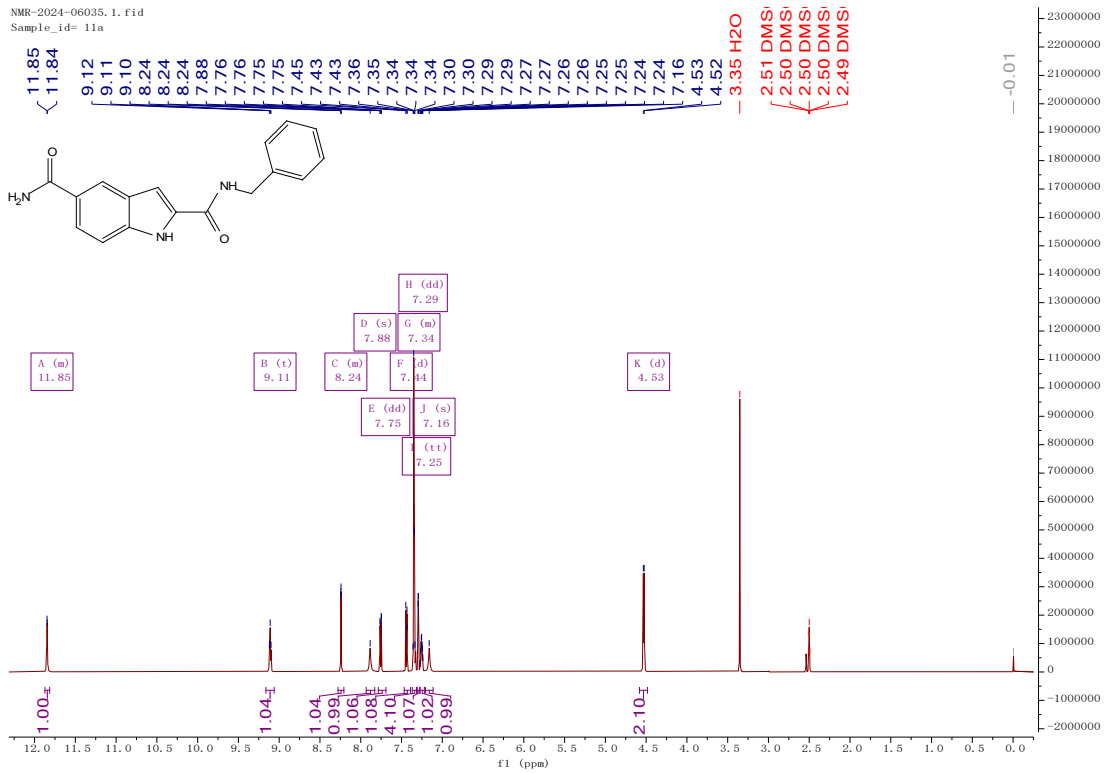

Figure 32. <sup>1</sup>H NMR spectrum of compound A10

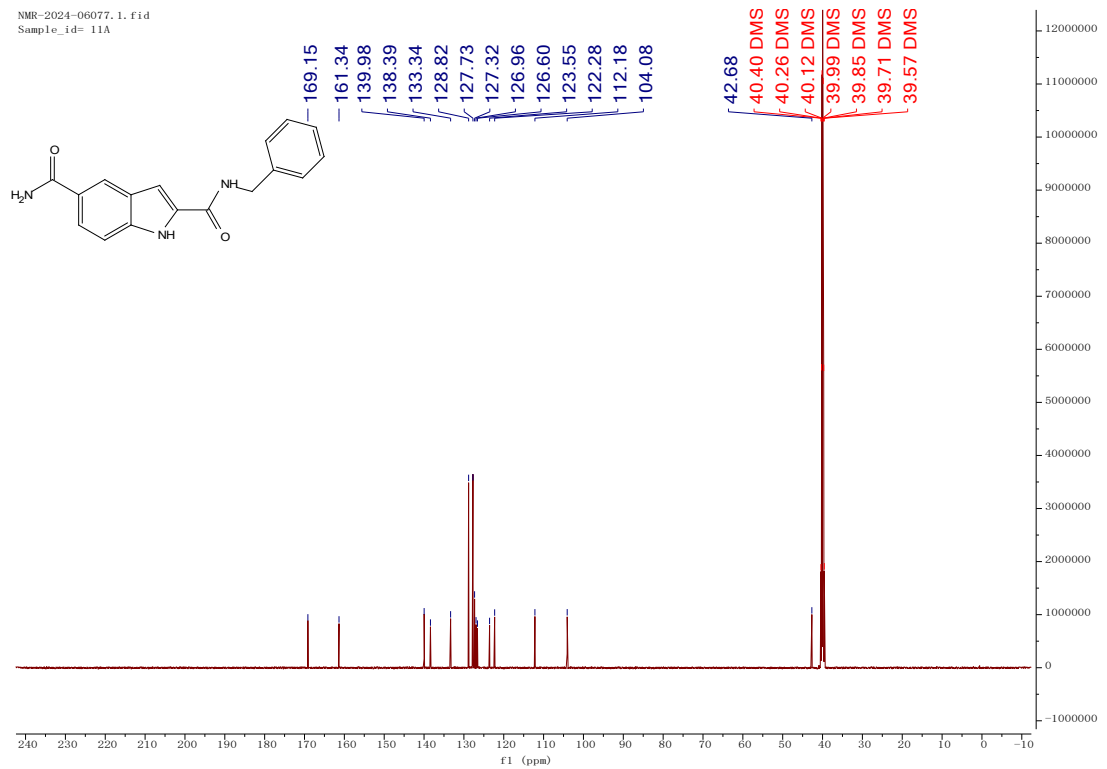

Figure 33. <sup>13</sup>C NMR spectrum of compound A10

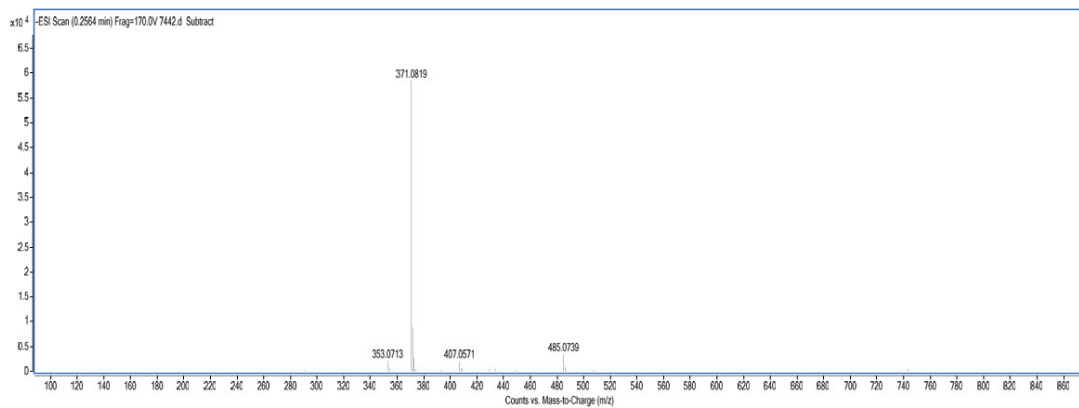

Figure 34. HRMS spectrum of compound A11

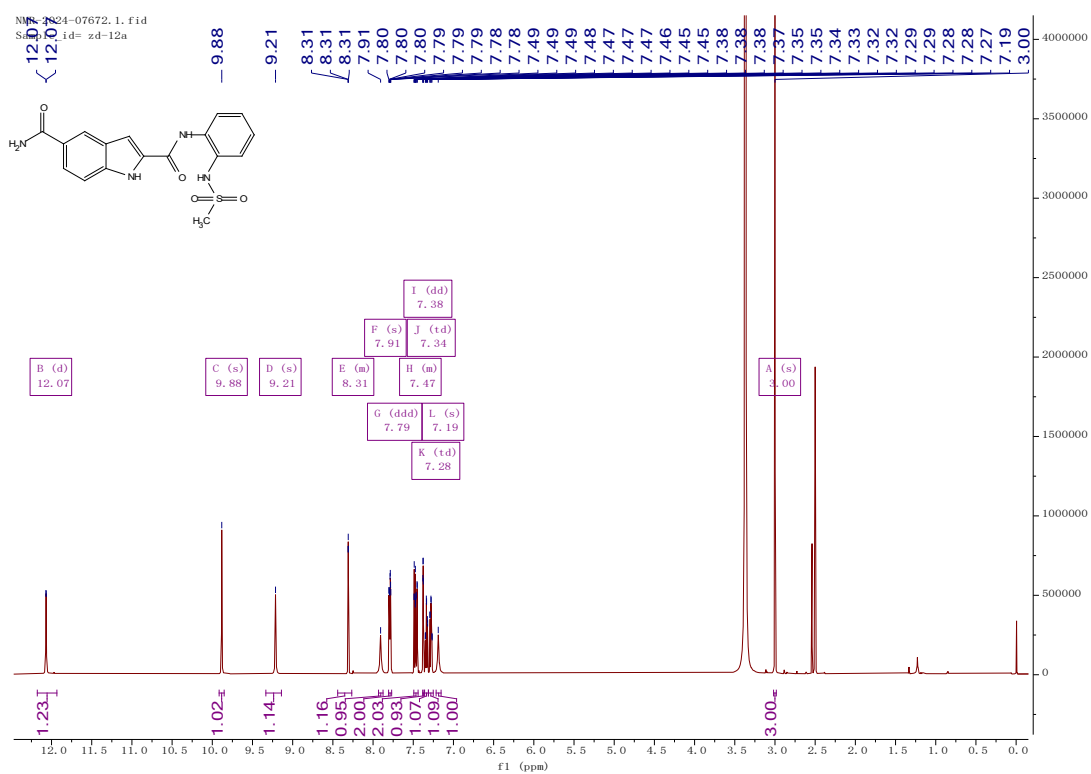

Figure 35. <sup>1</sup>H NMR spectrum of compound A11

NMR-2024-07694\_1.fid  
Sample\_id= xd-12a

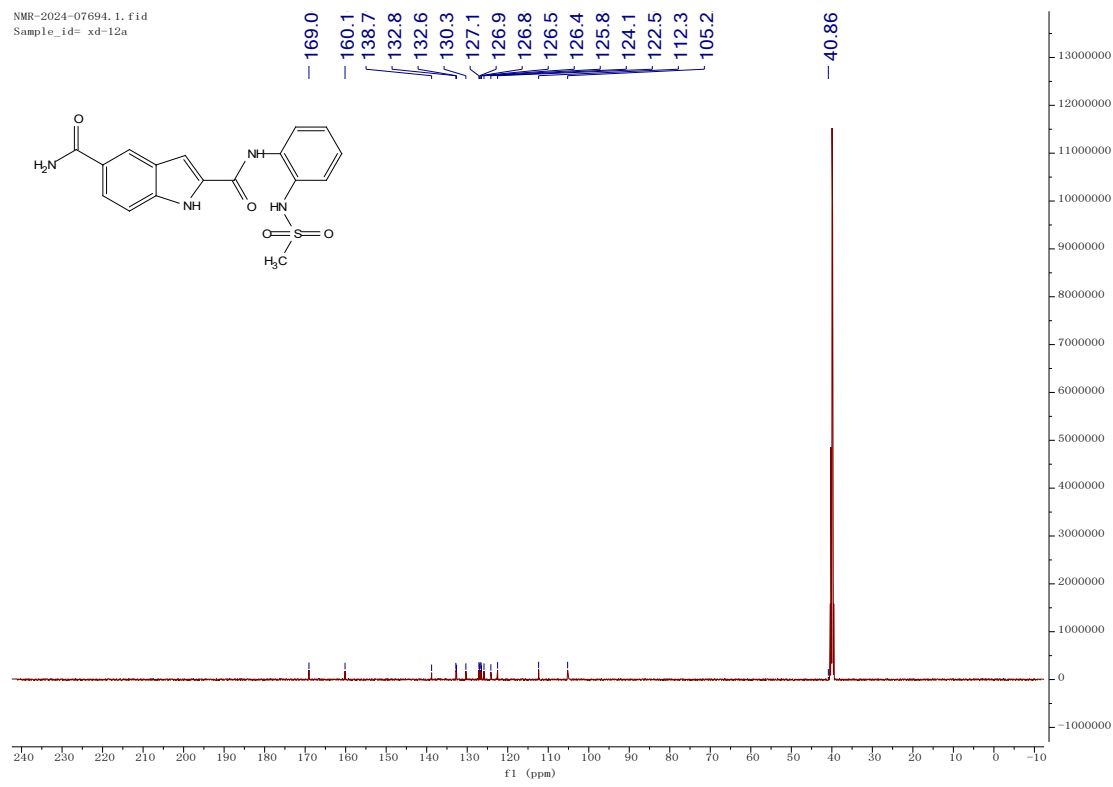

Figure 36. <sup>13</sup>C NMR spectrum of compound A11

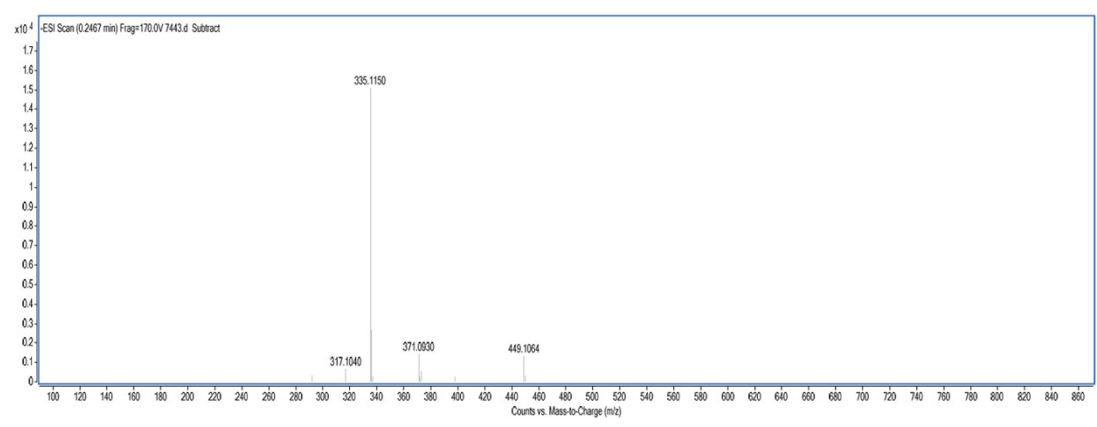

Figure 37. HRMS spectrum of compound A12

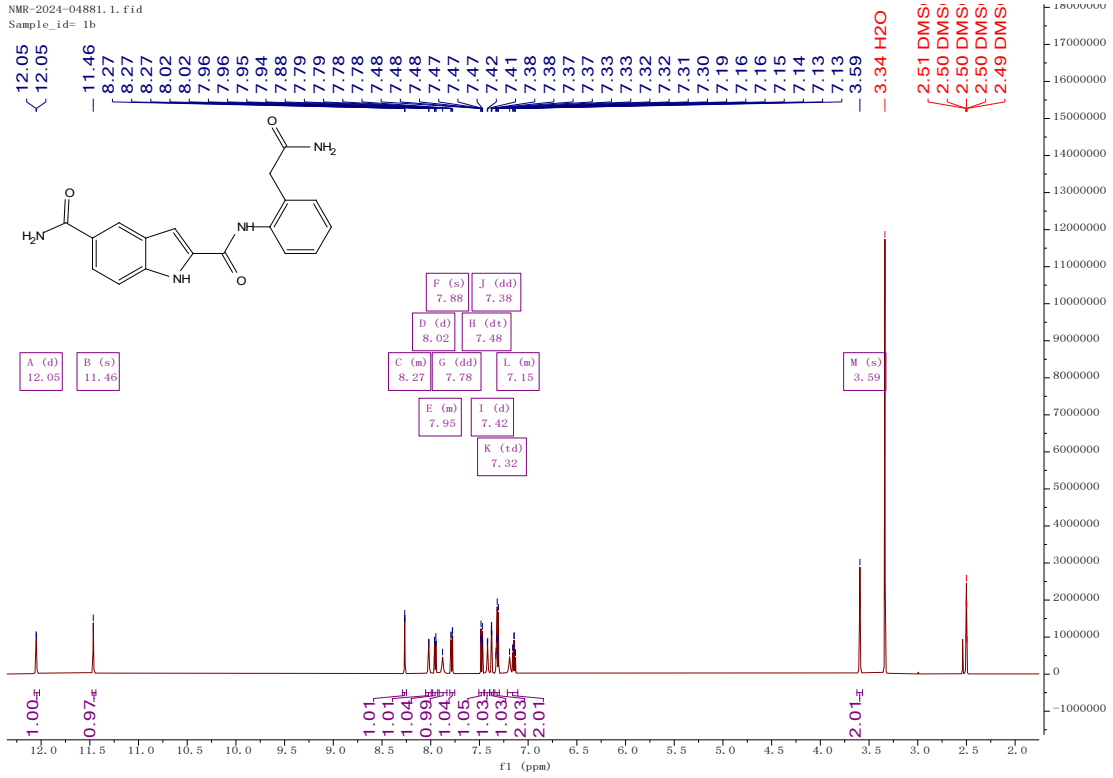

Figure 38. <sup>1</sup>H NMR spectrum of compound A12

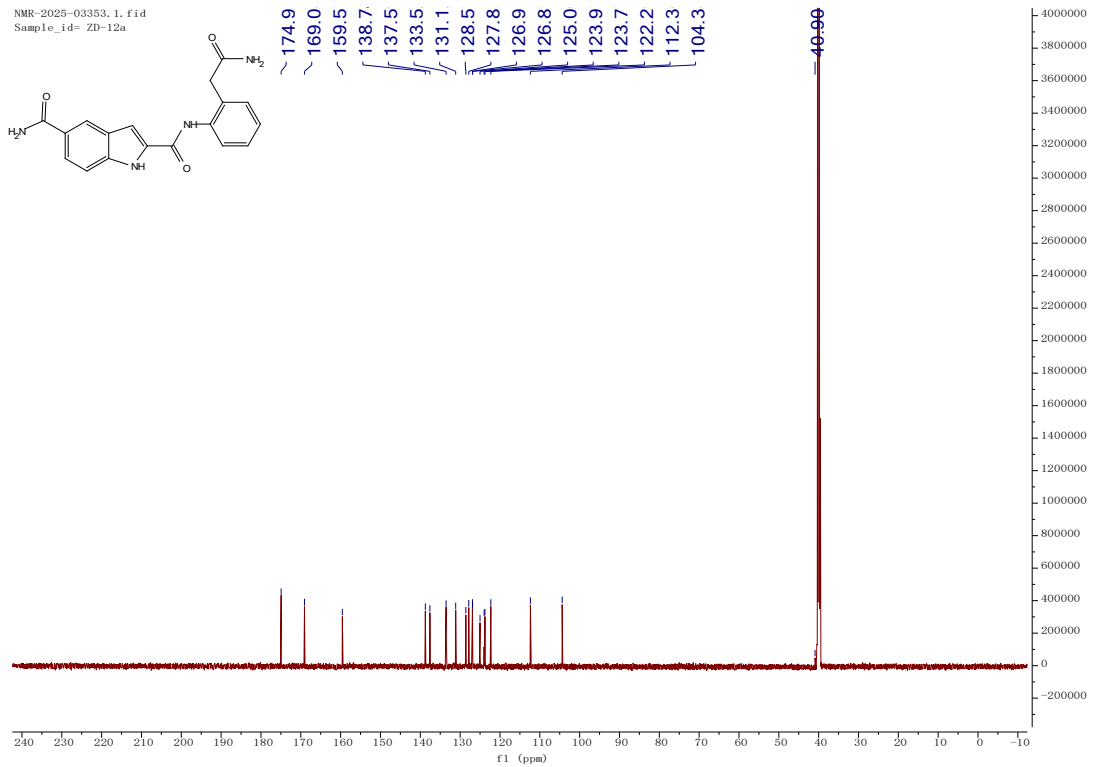

Figure 39. <sup>13</sup>C NMR spectrum of compound A12

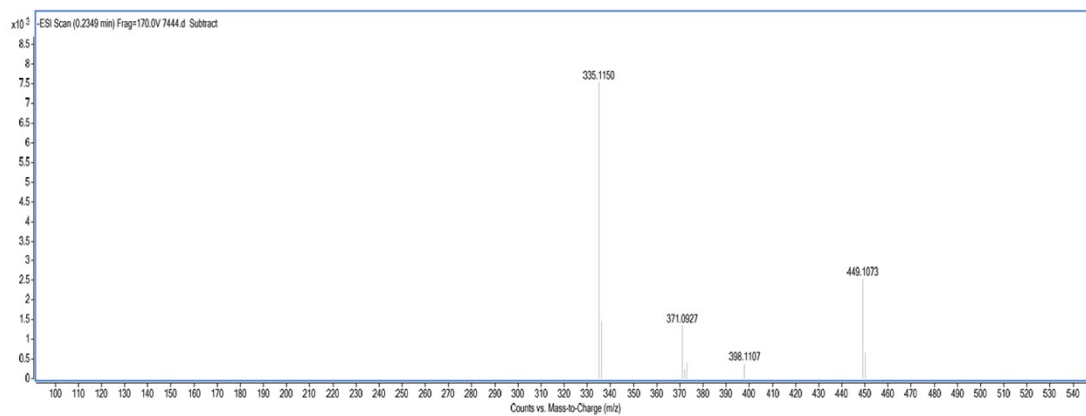

Figure 40. HRMS spectrum of compound A13

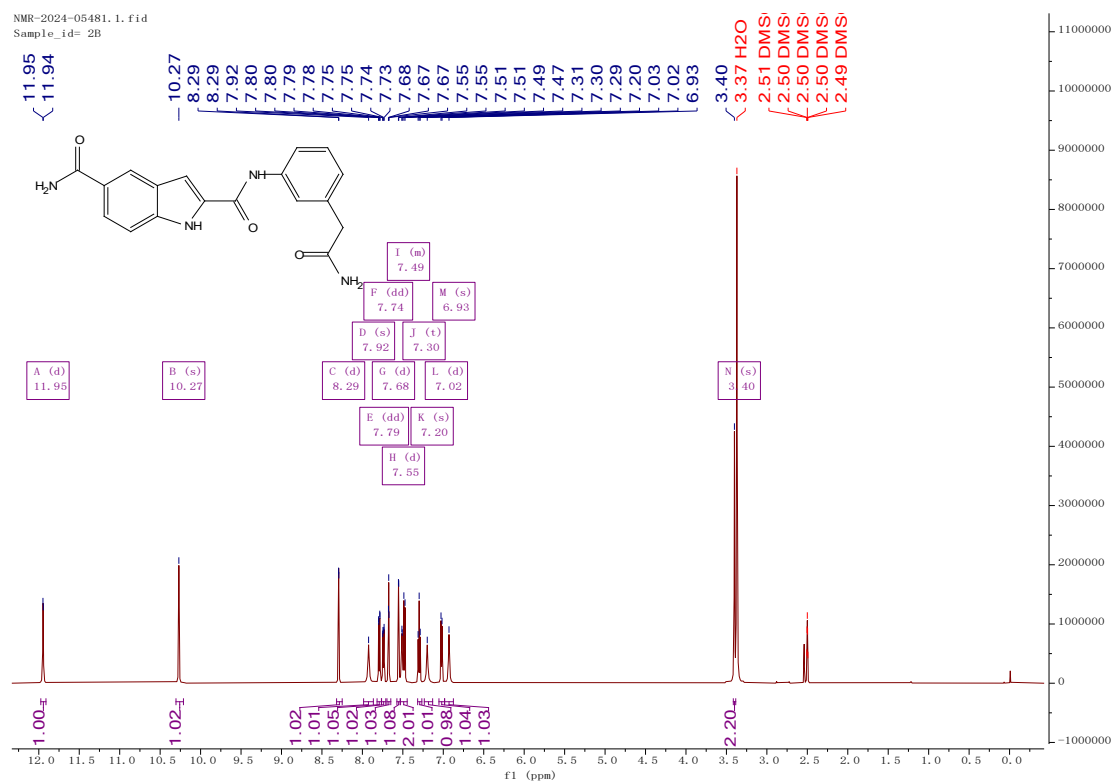

Figure 41. <sup>1</sup>H NMR spectrum of compound A13

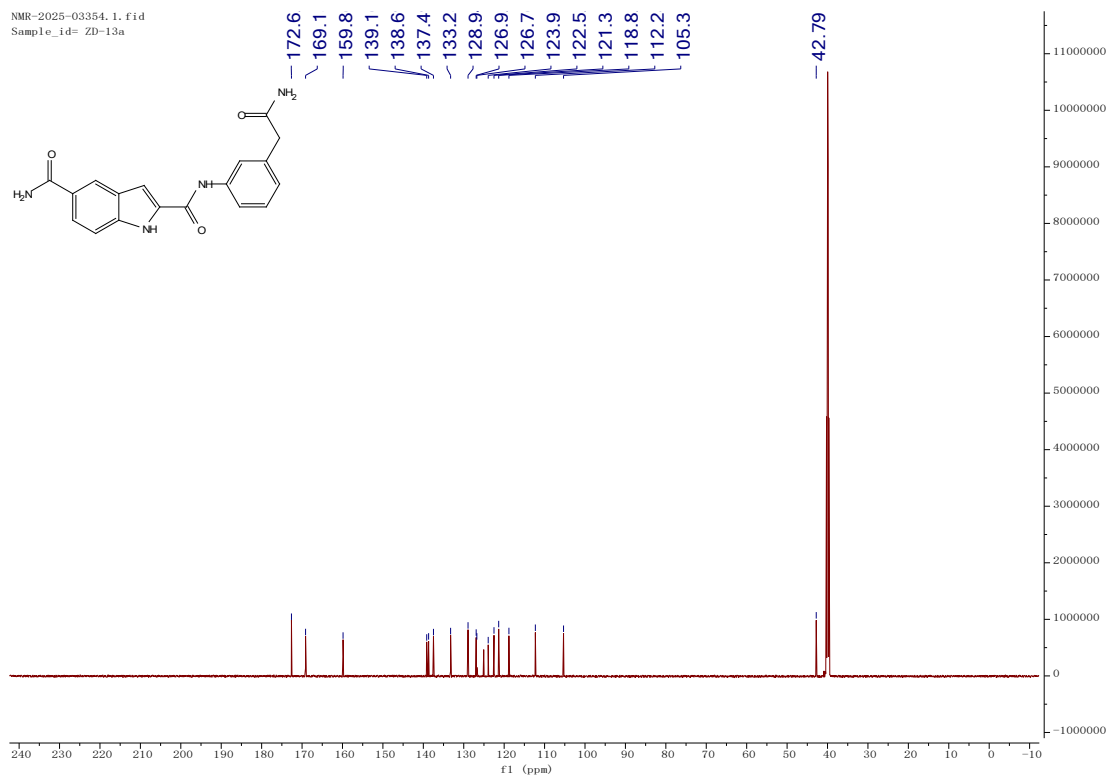

**Figure 42.**  $^{13}\text{C}$  NMR spectrum of compound A13

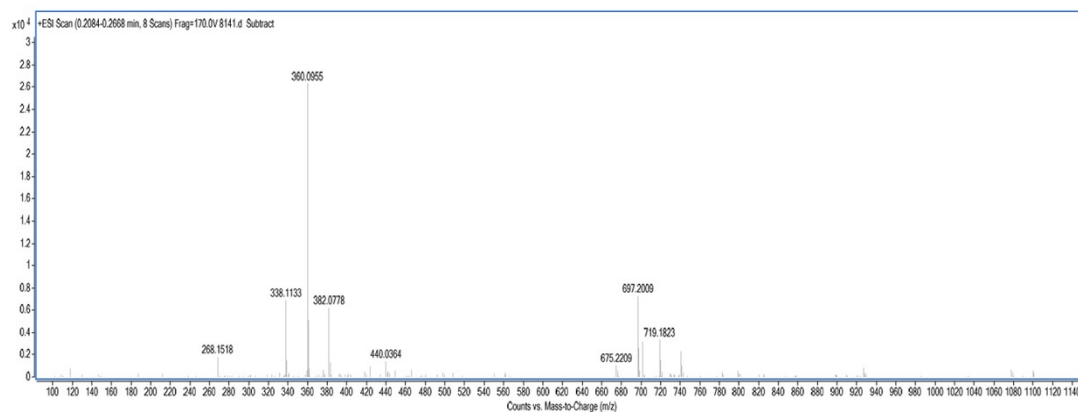

**Figure 43.** HRMS spectrum of compound A14

NMR-2024-05086. 1. fid  
Sample\_id= 1c

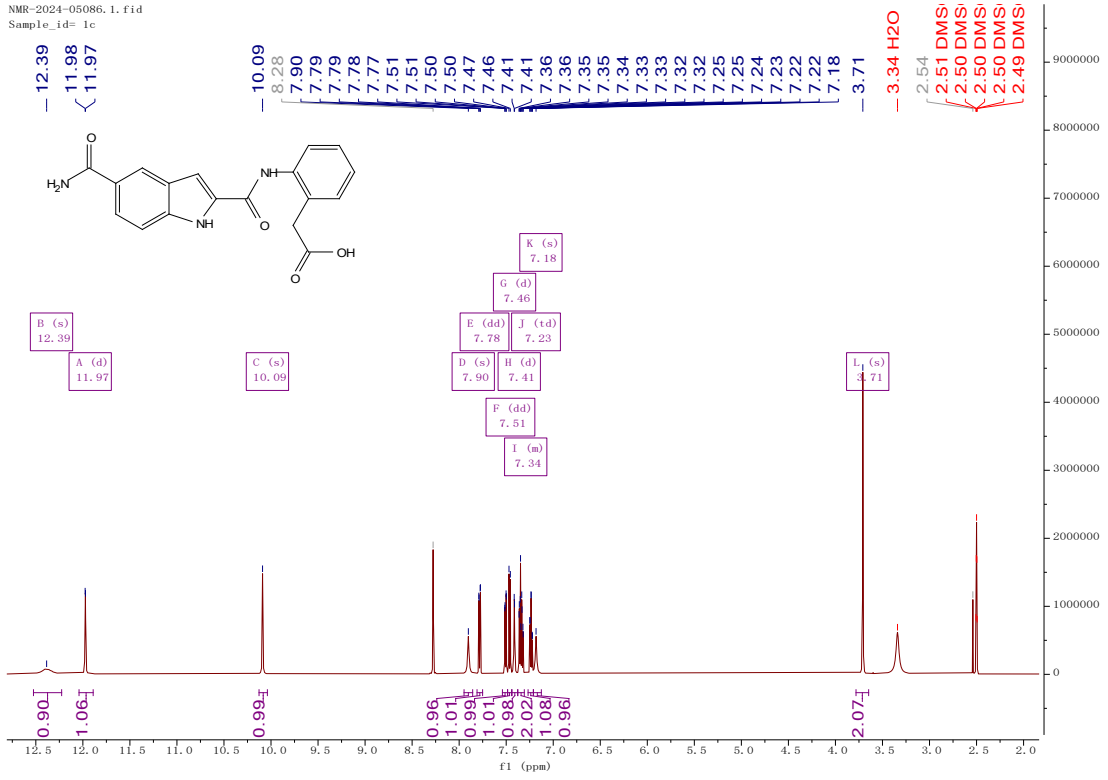

Figure 44. <sup>1</sup>H NMR spectrum of compound A14

NMR-2024-05692. 1. fid  
Sample\_id= 1C

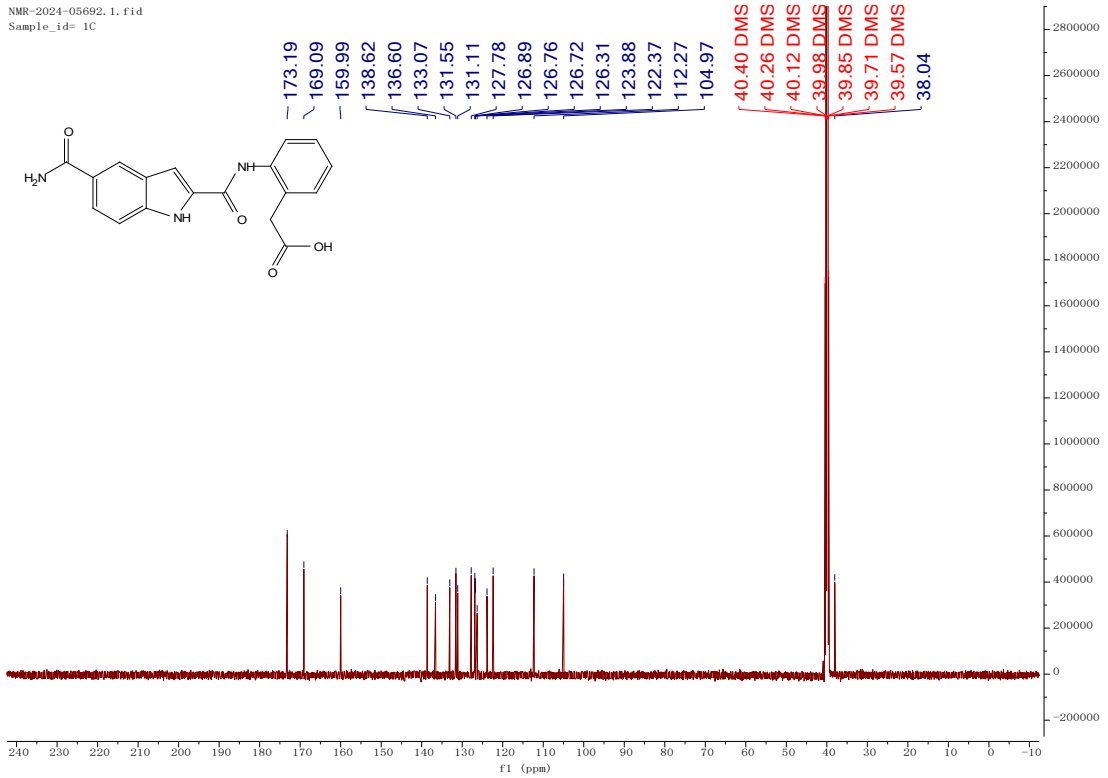

Figure 45. <sup>13</sup>C NMR spectrum of compound A14

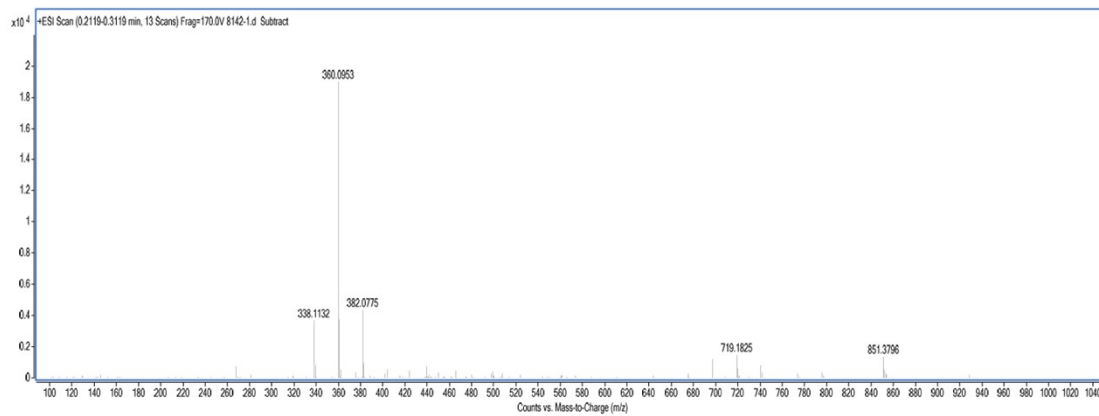

Figure 46. HRMS spectrum of compound A15

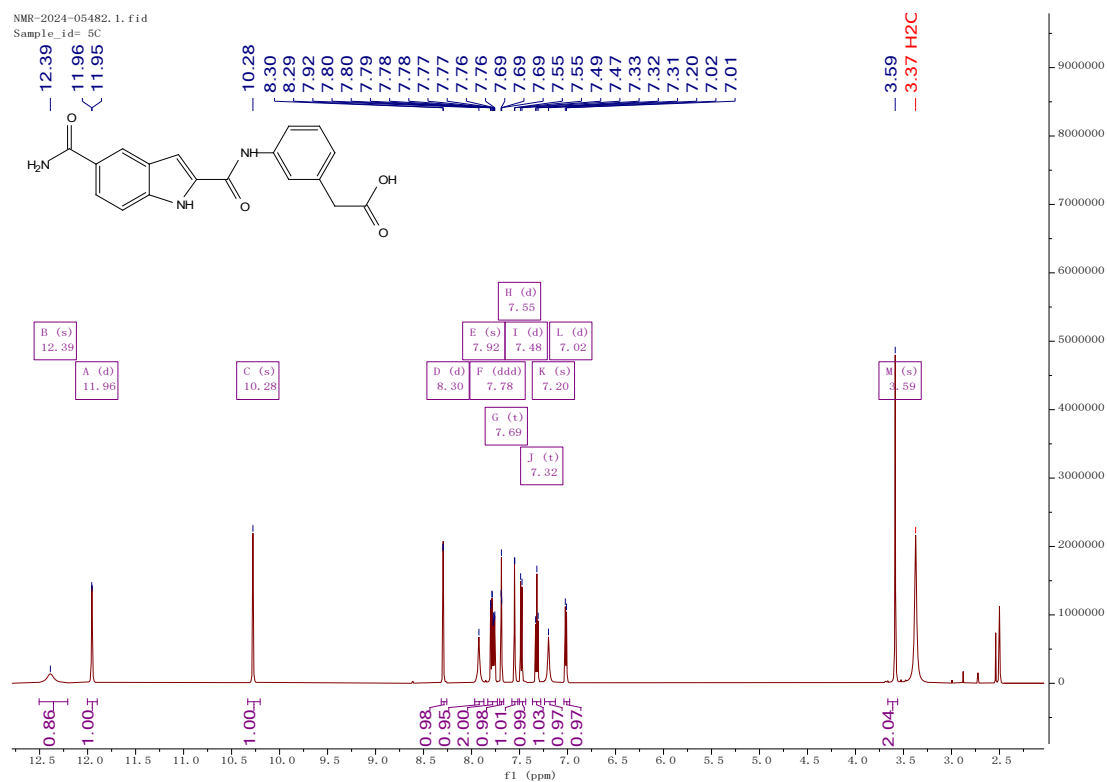

Figure 47. <sup>1</sup>H NMR spectrum of compound A15

NMR-2024-05833.1.fid  
Sample\_id= 5c

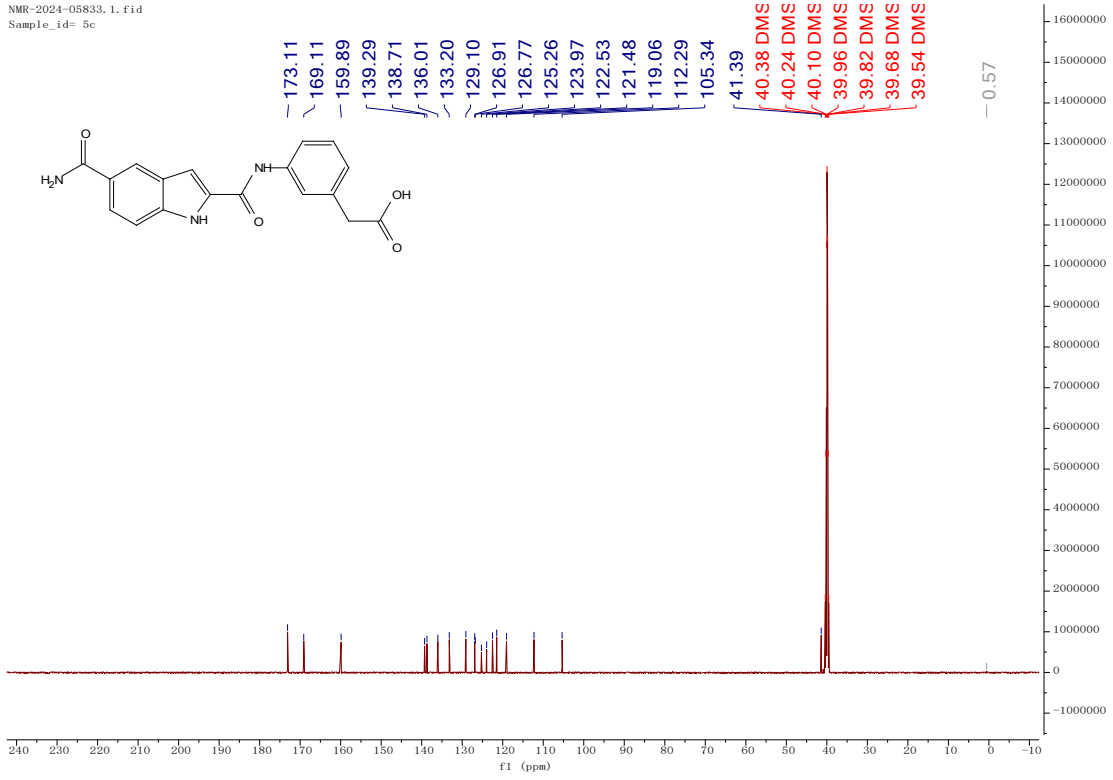

Figure 48. <sup>13</sup>C NMR spectrum of compound A15

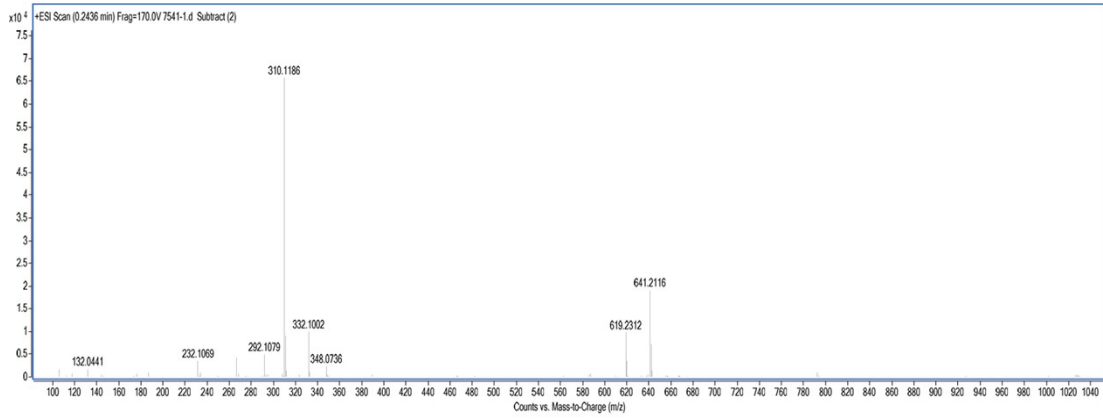

Figure 49. HRMS spectrum of compound A16

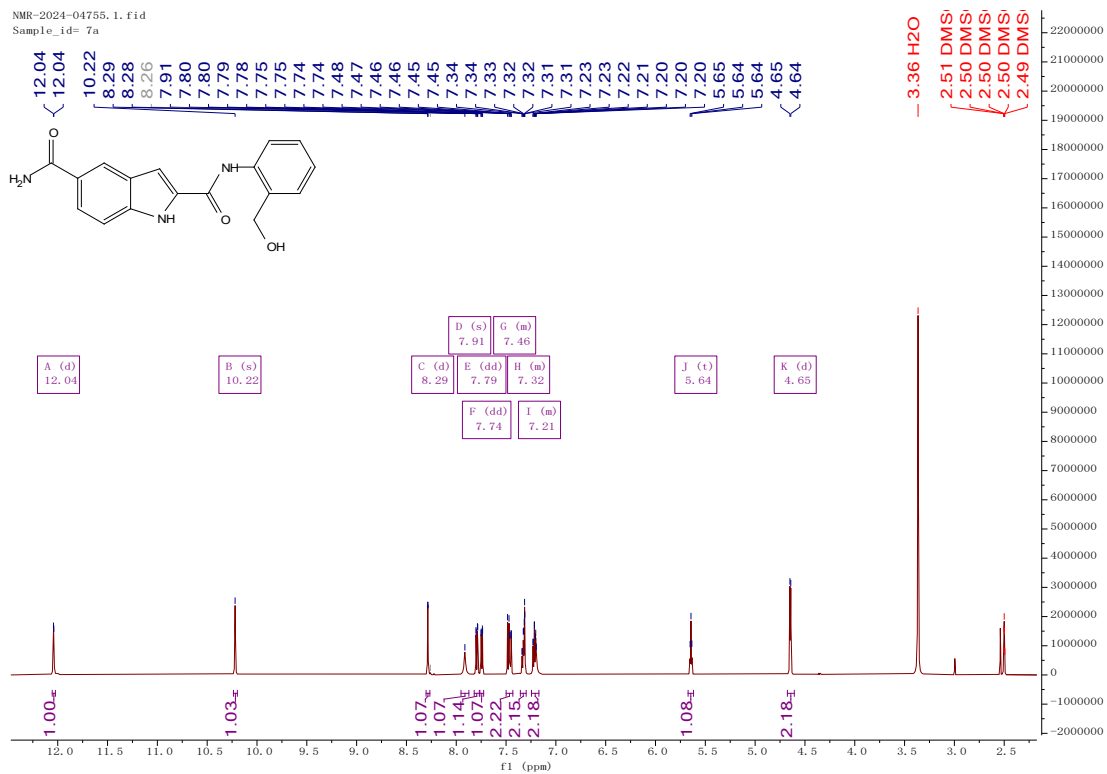

Figure 50.  $^1\text{H}$  NMR spectrum of compound A16

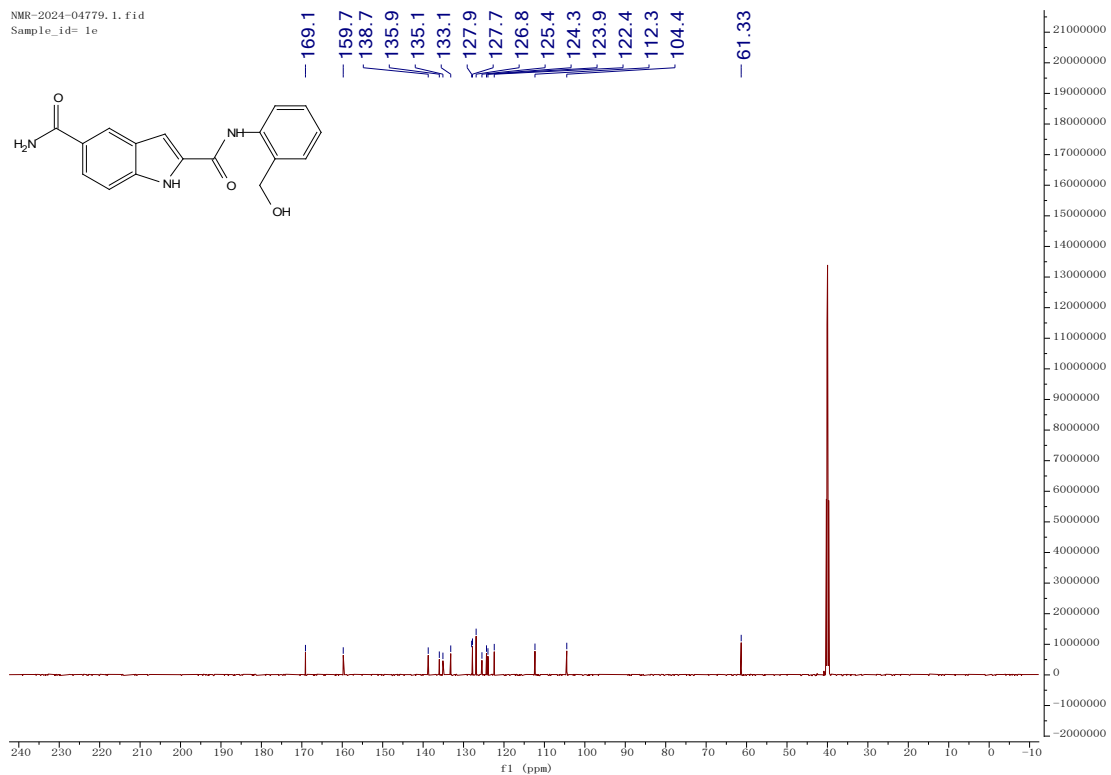

Figure 51.  $^{13}\text{C}$  NMR spectrum of compound A16

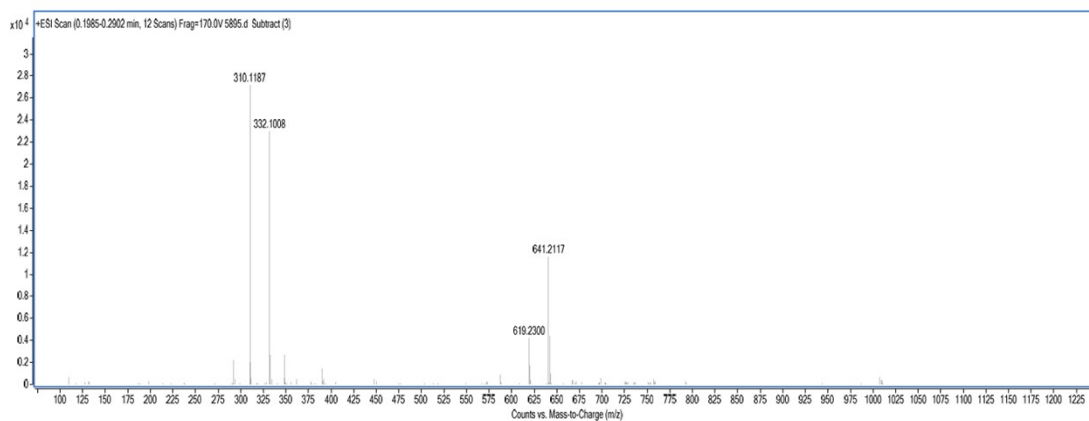

Figure 52. HRMS spectrum of compound A17

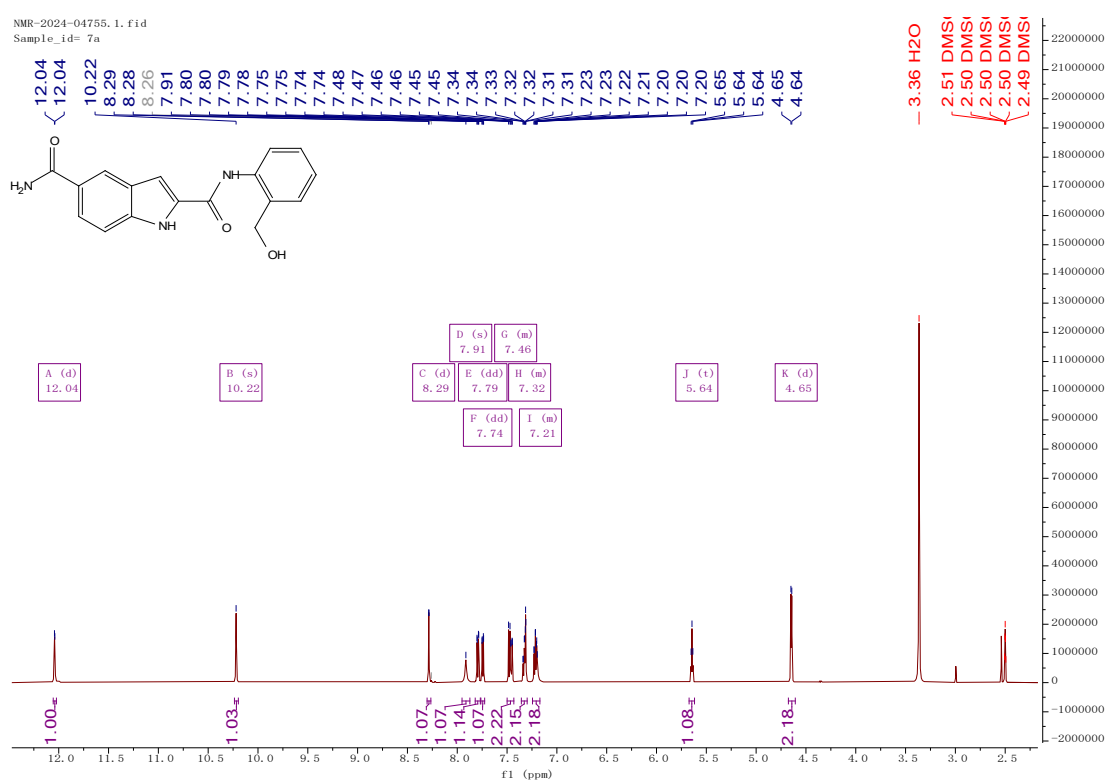

Figure 53. <sup>1</sup>H NMR spectrum of compound A17

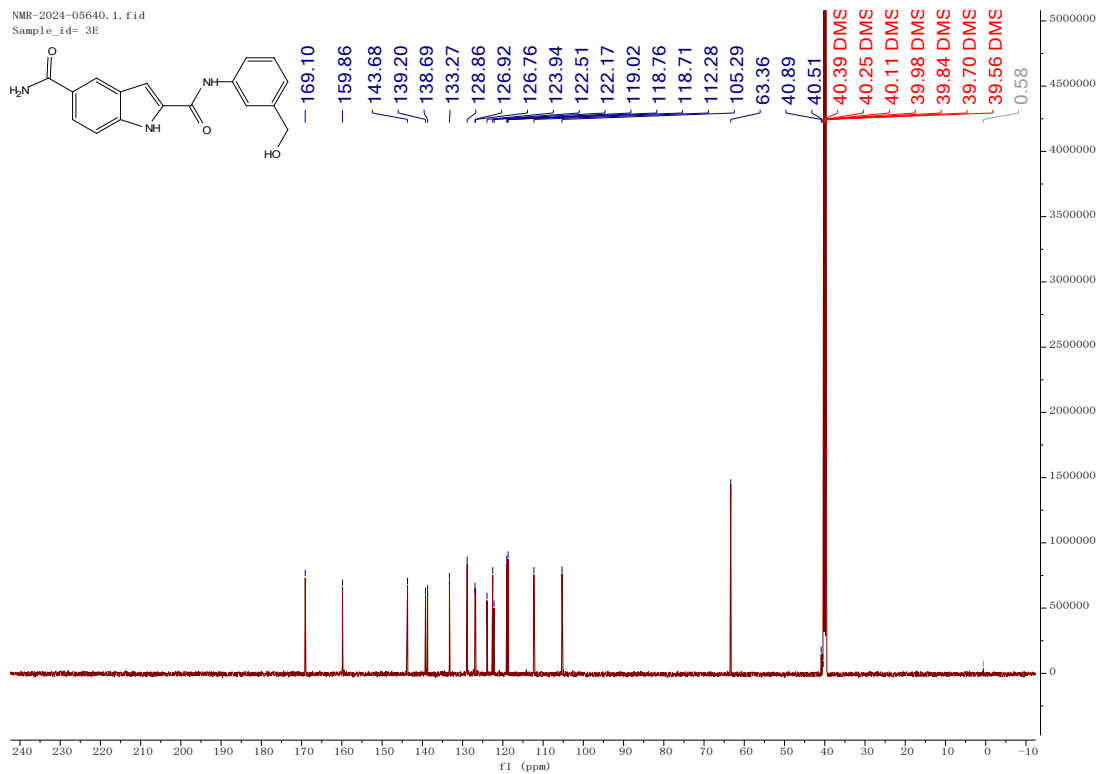

**Figure 54.**  $^{13}\text{C}$  NMR spectrum of compound A17

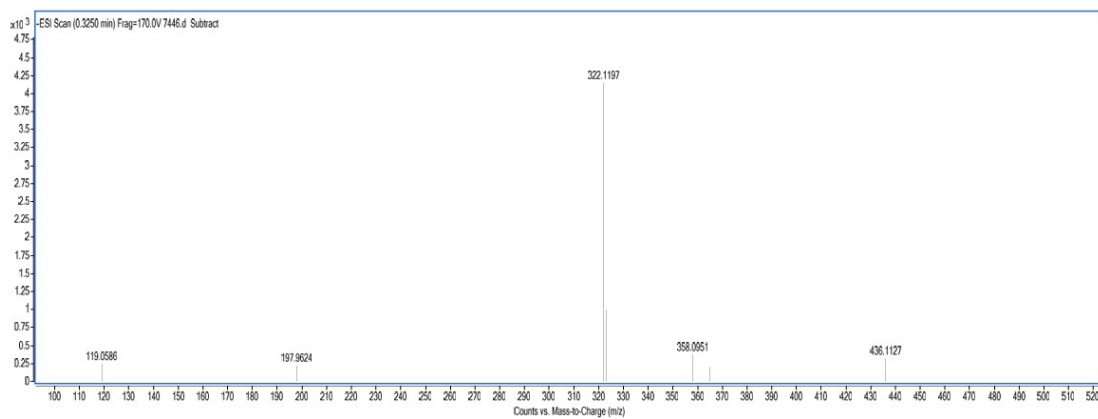

**Figure 55.** HRMS spectrum of compound A18

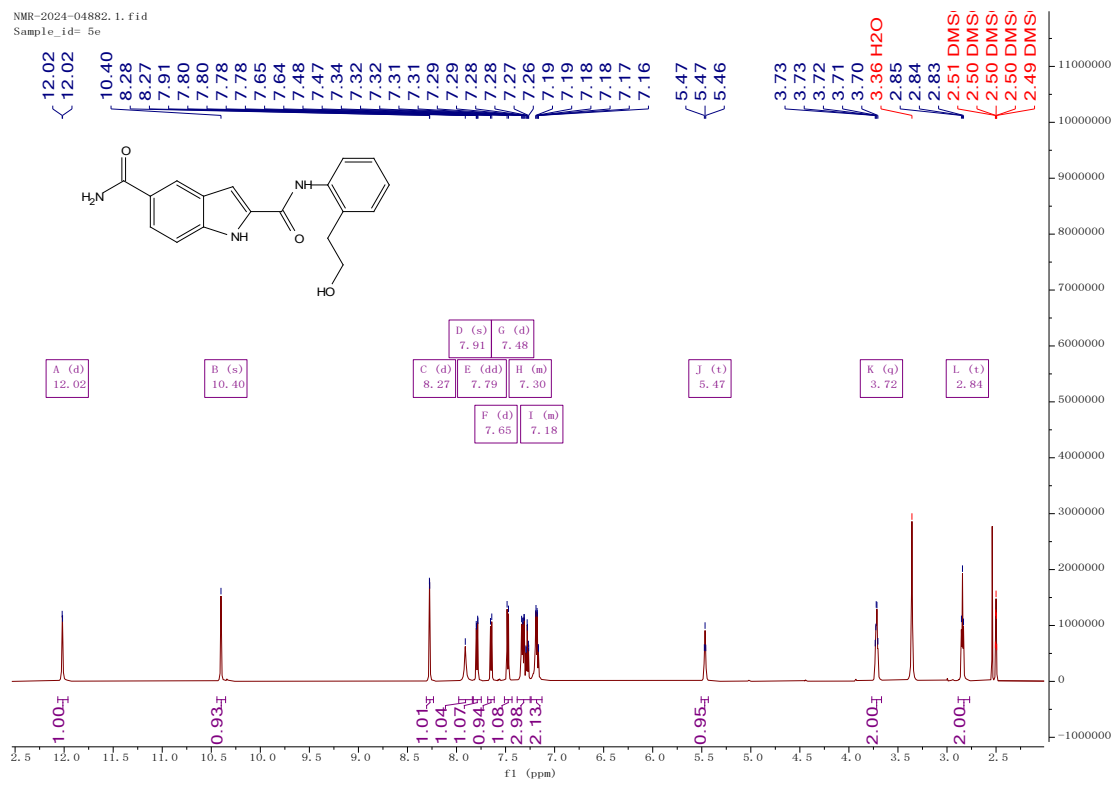

Figure 56. <sup>1</sup>H NMR spectrum of compound A18

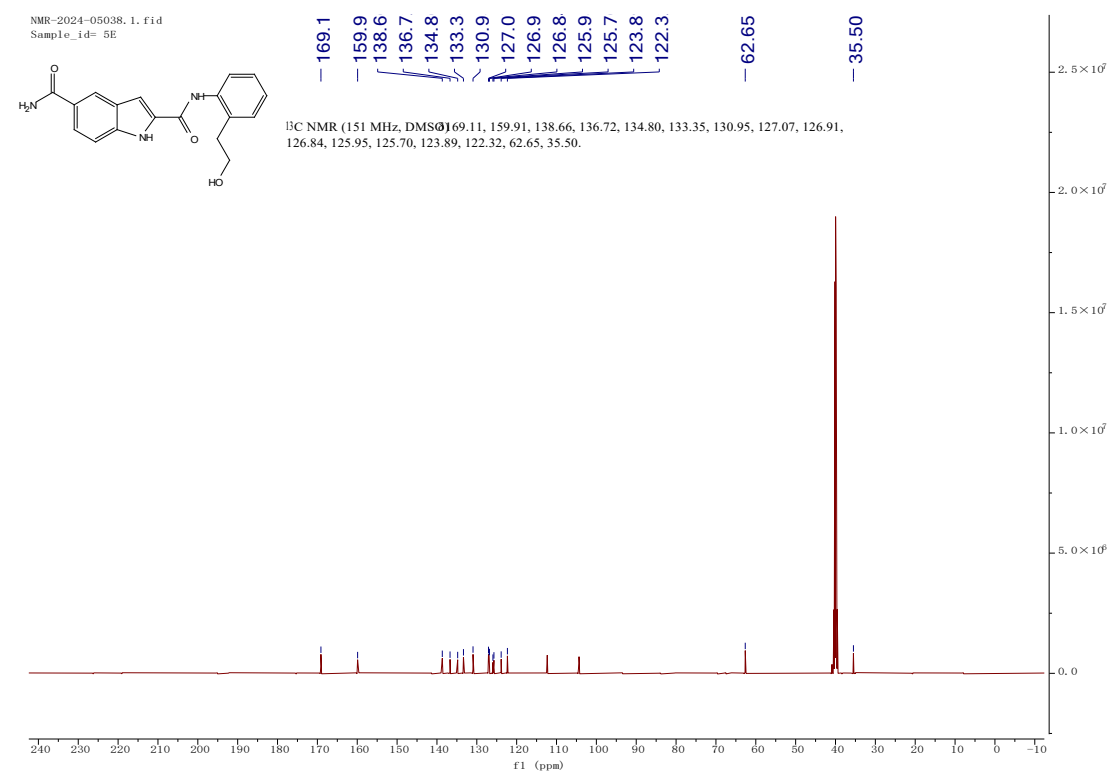

Figure 57. <sup>13</sup>C NMR spectrum of compound A18

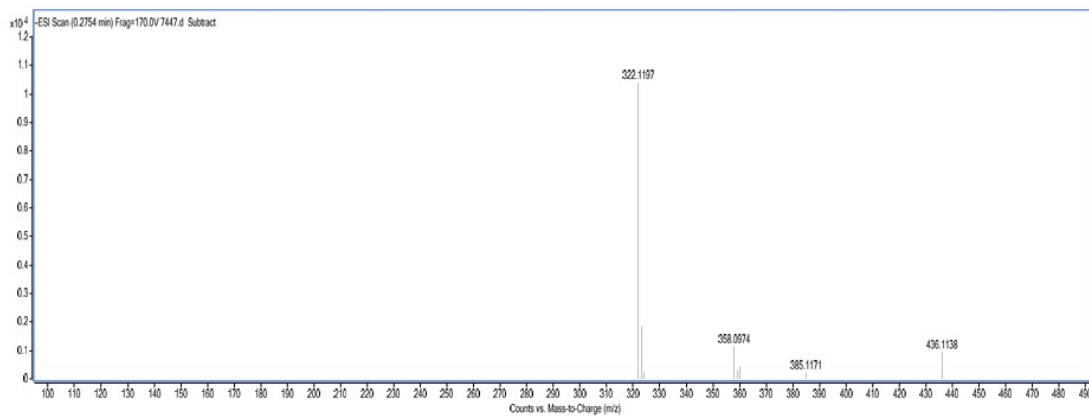

Figure 58. HRMS spectrum of compound A19

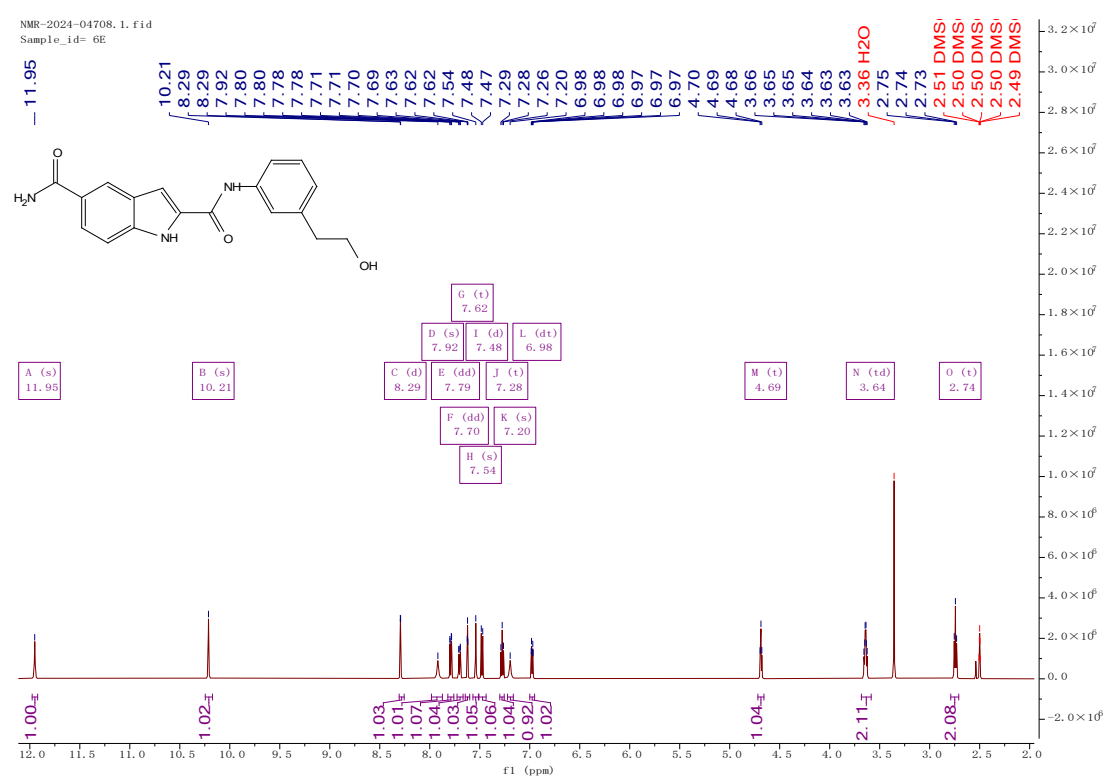

Figure 59. <sup>1</sup>H NMR spectrum of compound A19

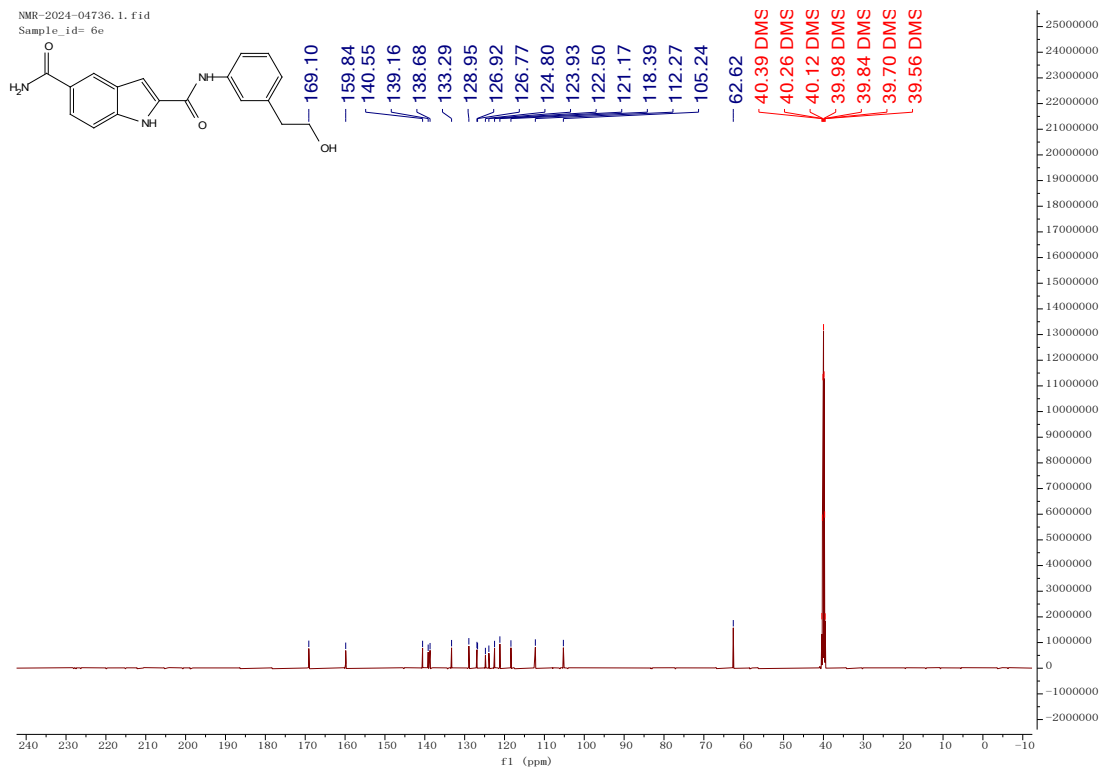

**Figure 60.**  $^{13}\text{C}$  NMR spectrum of compound A19

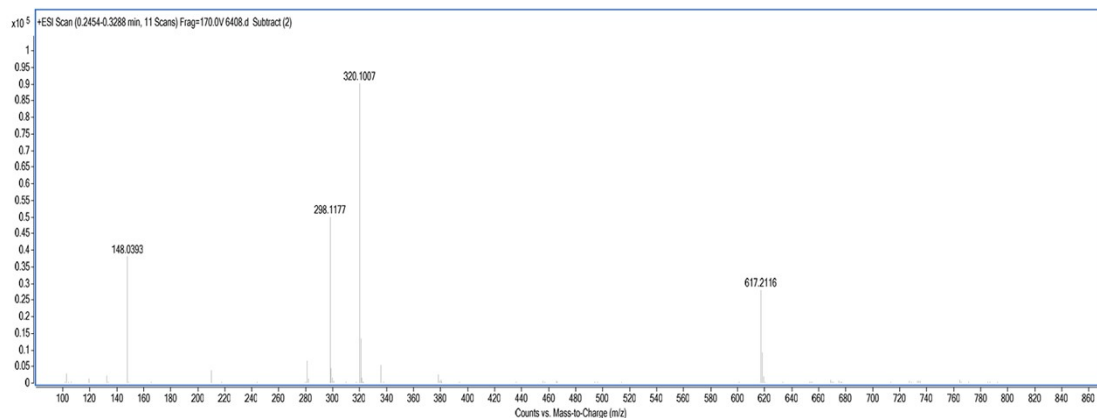

**Figure 61.** HRMS spectrum of compound B1

NMR-2024-06387.1.fid  
Sample\_id= 1b

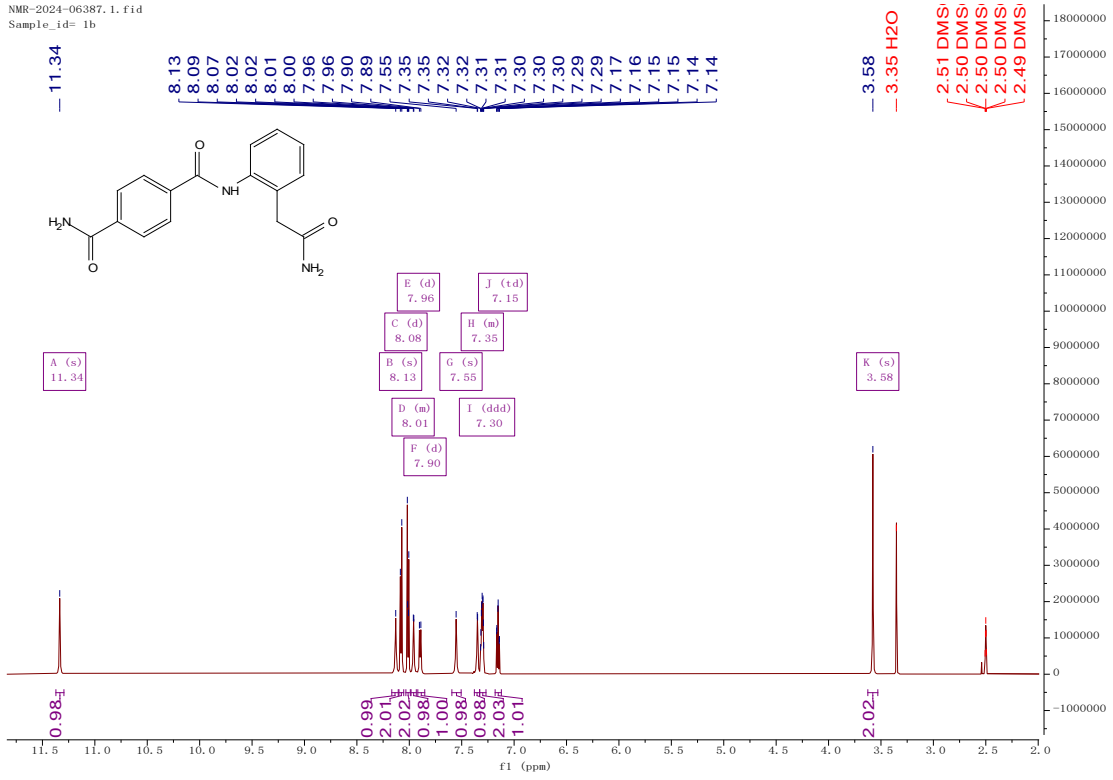

Figure 62. <sup>1</sup>H NMR spectrum of compound B1

NMR-2024-06454.1.fid  
Sample\_id= 1b

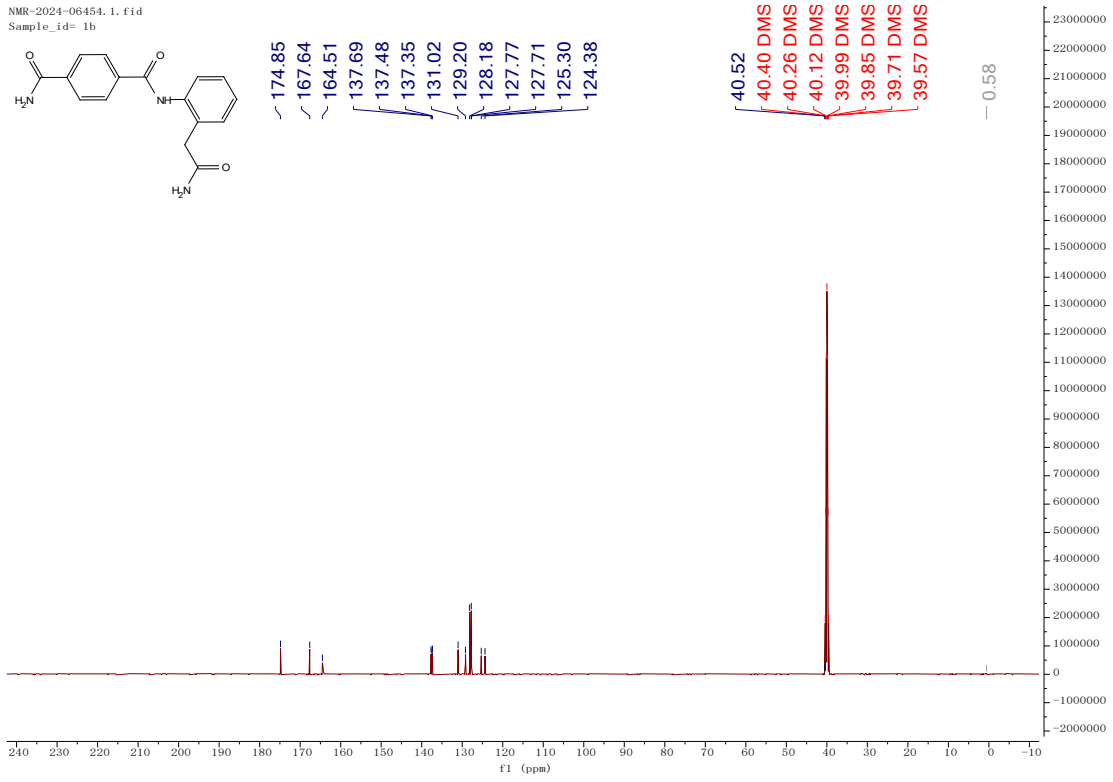

Figure 63. <sup>13</sup>C NMR spectrum of compound B1

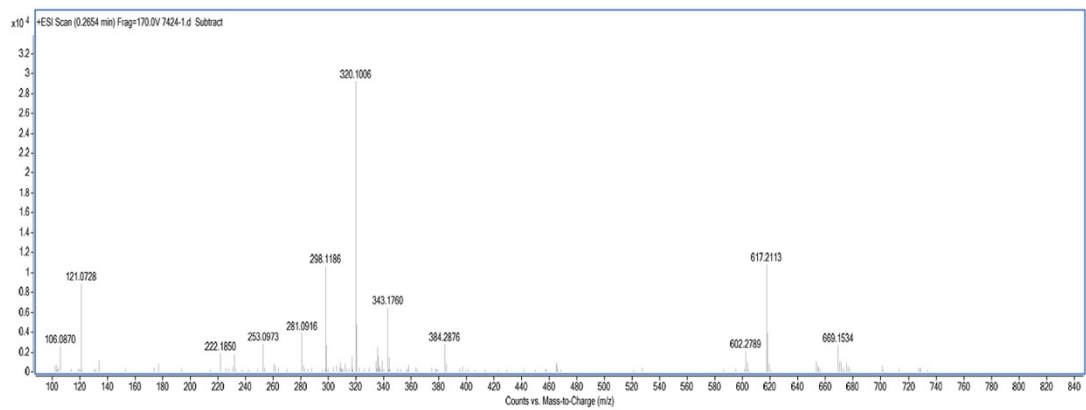

Figure 64. HRMS spectrum of compound B2

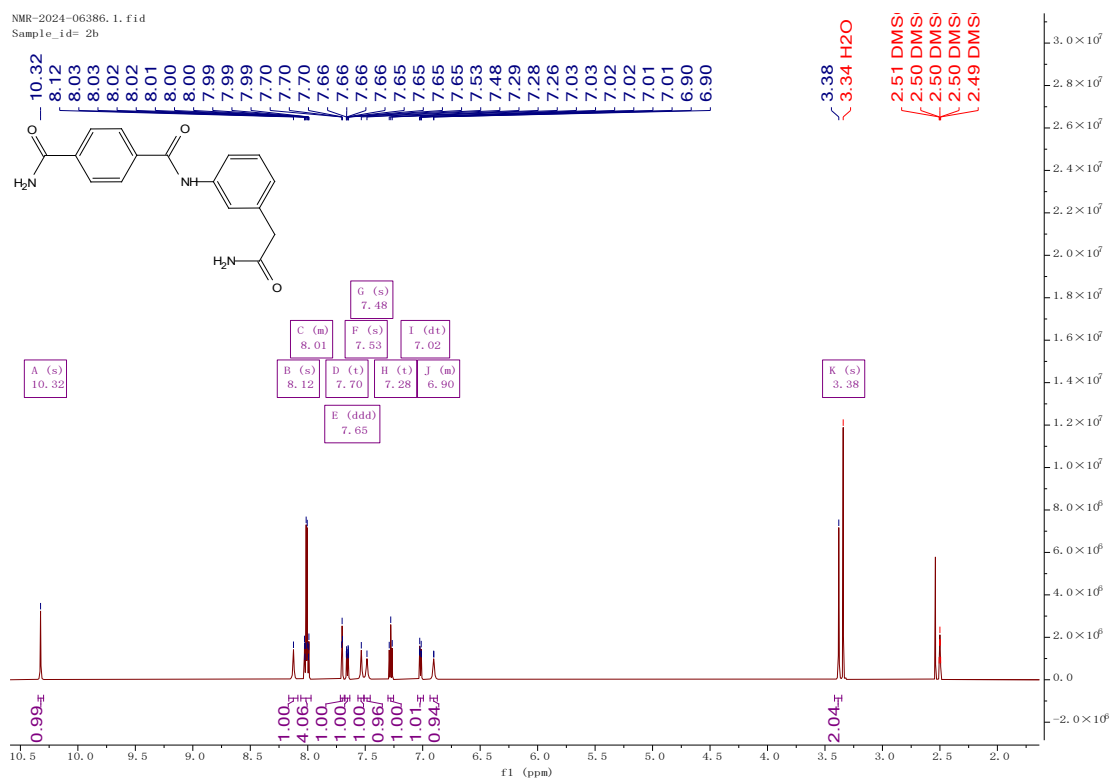

Figure 65. <sup>1</sup>H NMR spectrum of compound B2

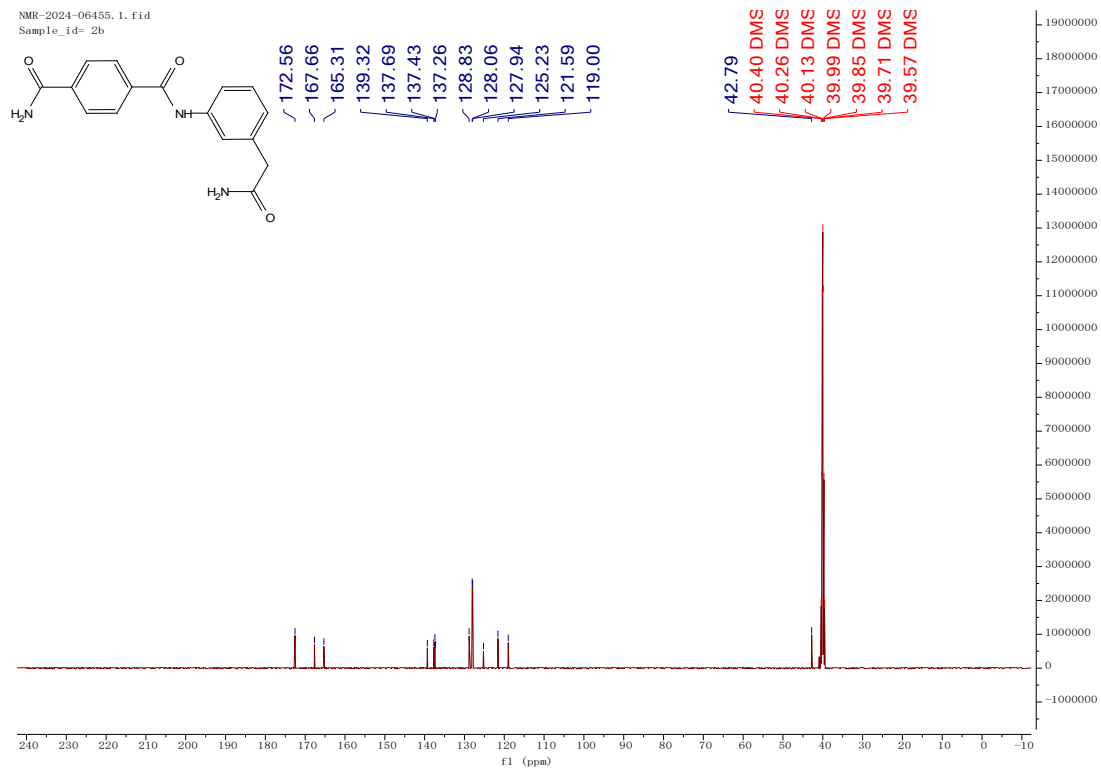

**Figure 66.**  $^{13}\text{C}$  NMR spectrum of compound **B2**

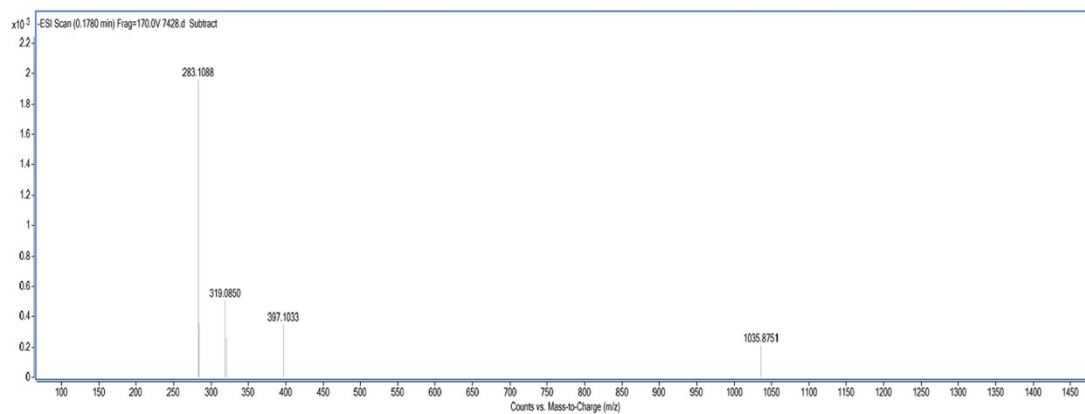

**Figure 67.** HRMS spectrum of compound **B3**

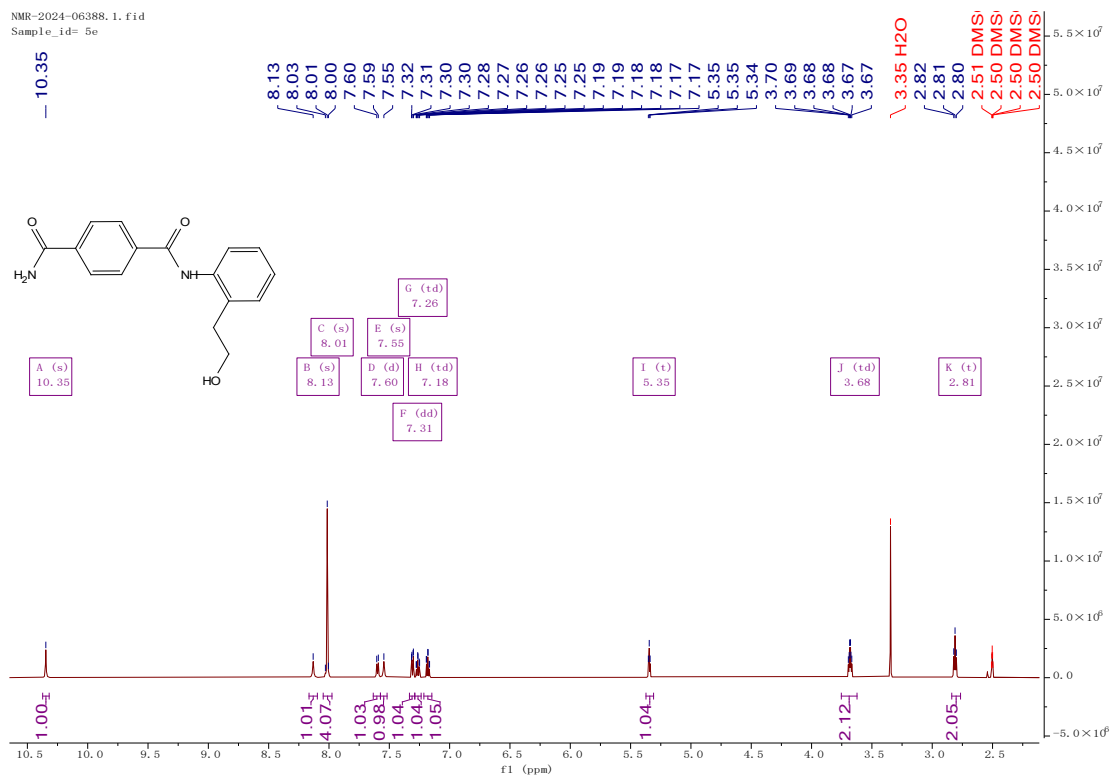

Figure 68.  $^1\text{H}$  NMR spectrum of compound B3

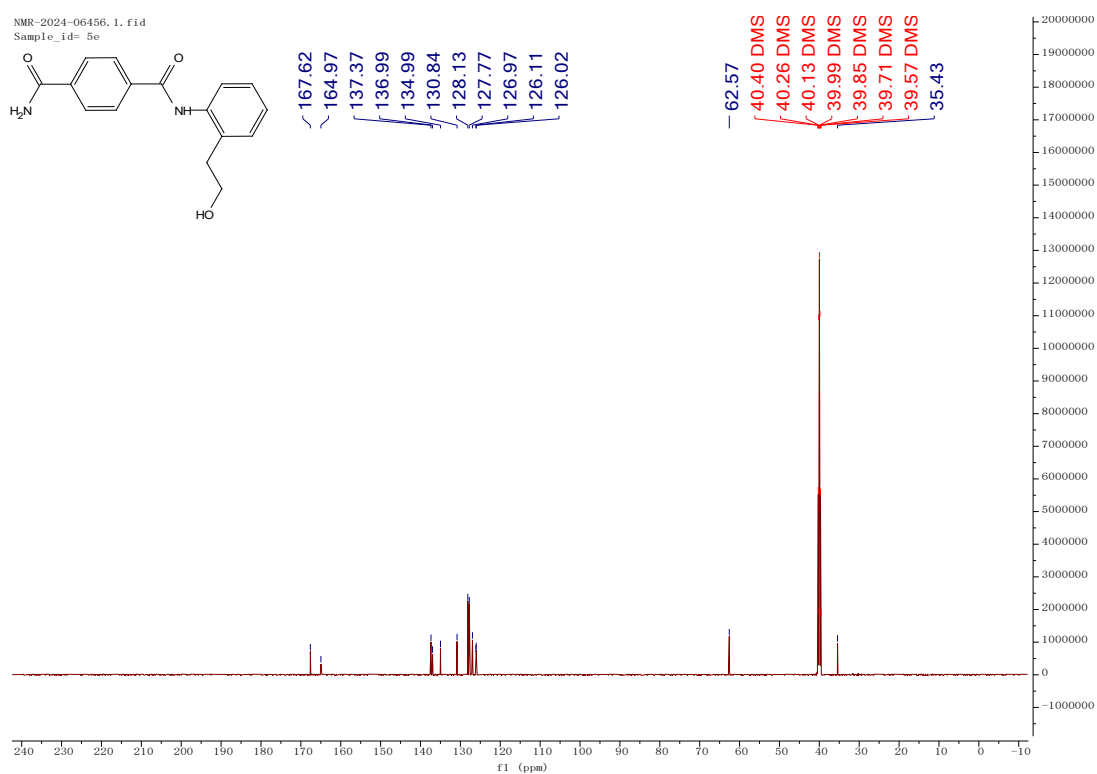

Figure 69.  $^{13}\text{C}$  NMR spectrum of compound B3

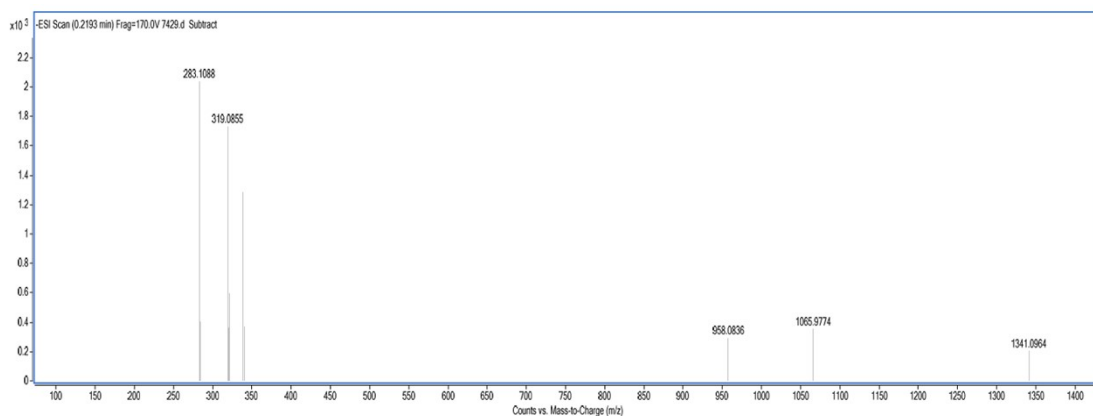

Figure 70. HRMS spectrum of compound B4

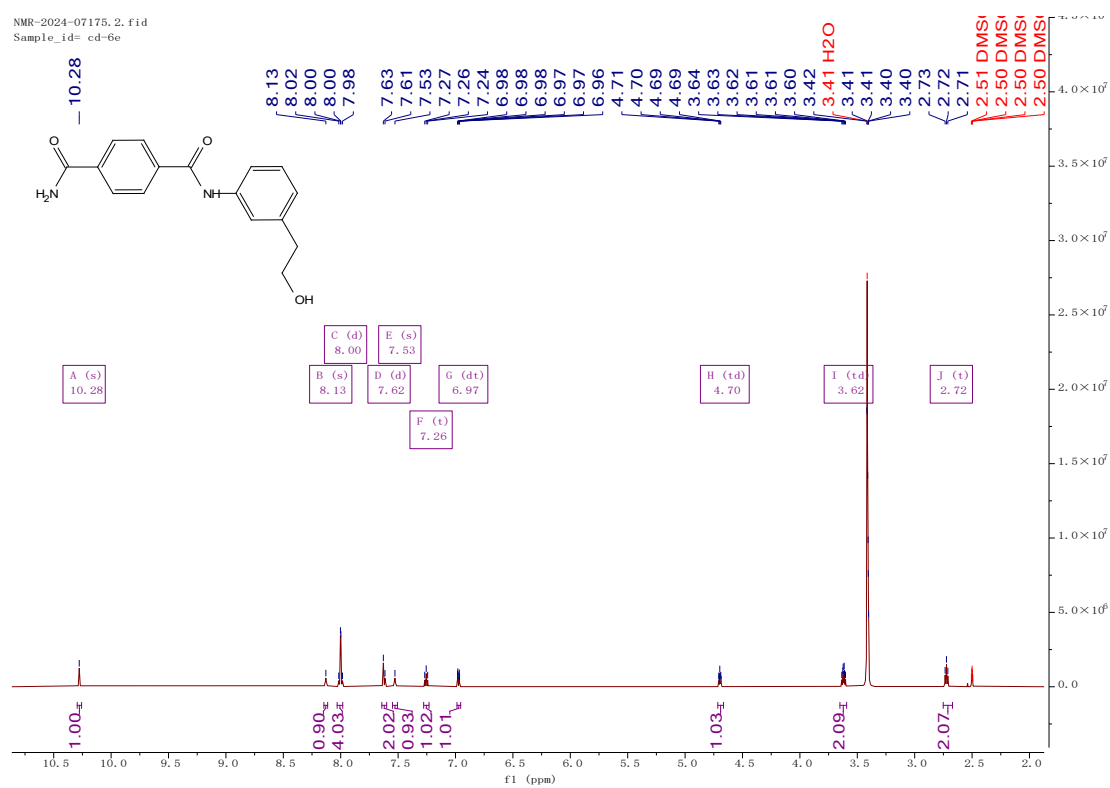

Figure 71. <sup>1</sup>H NMR spectrum of compound B4

NMR-2024-07220.1.fid  
Sample\_id= cd-6e

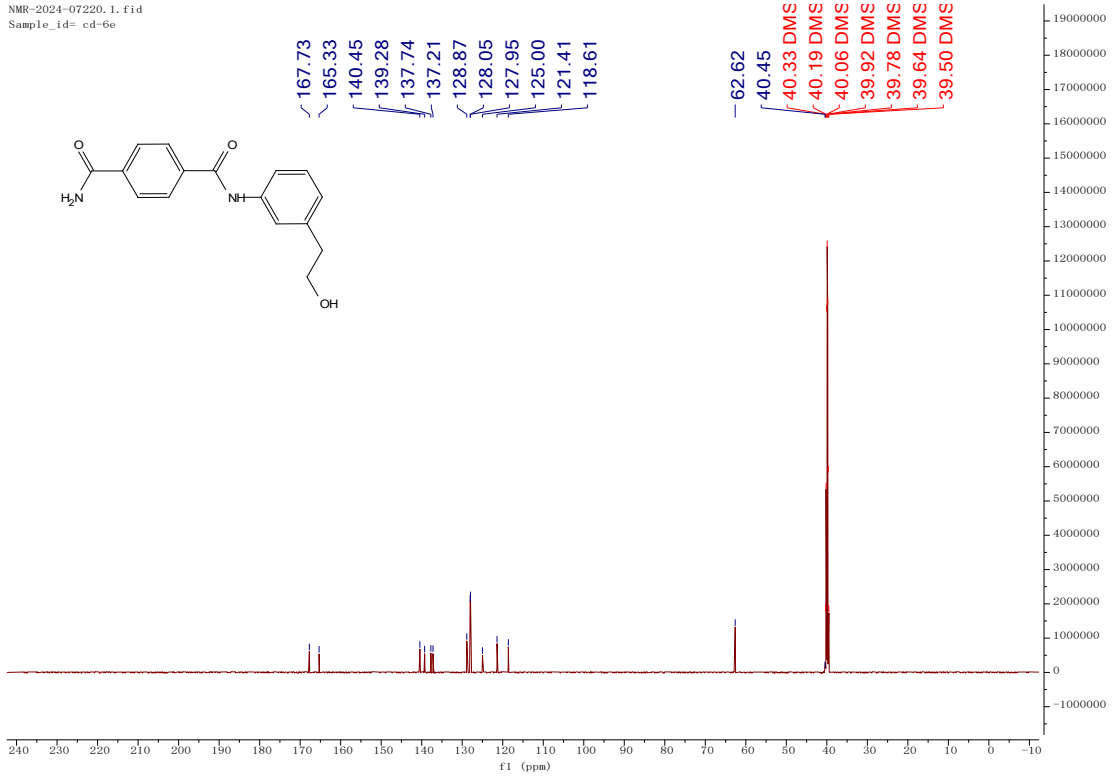

Figure 72. <sup>13</sup>C NMR spectrum of compound B4

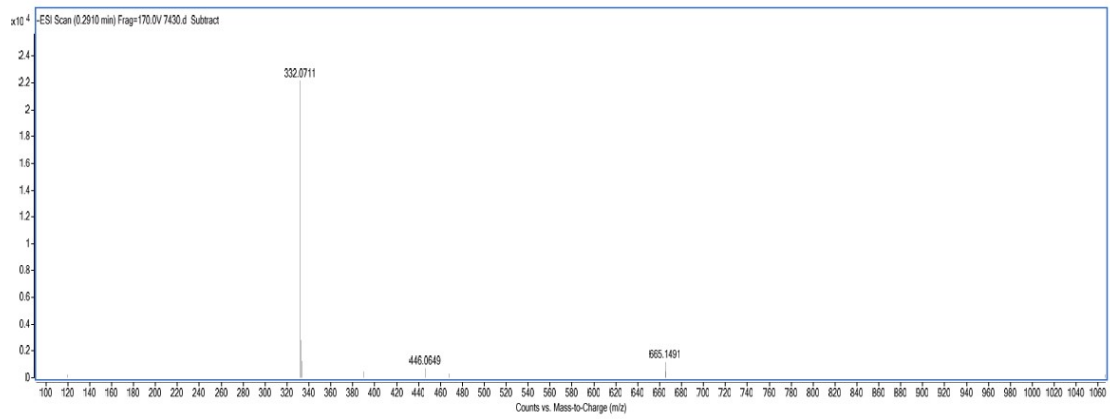

Figure 73. HRMS spectrum of compound B5

NMR-2024-07270.1.fid  
Sample\_id= cd-5a

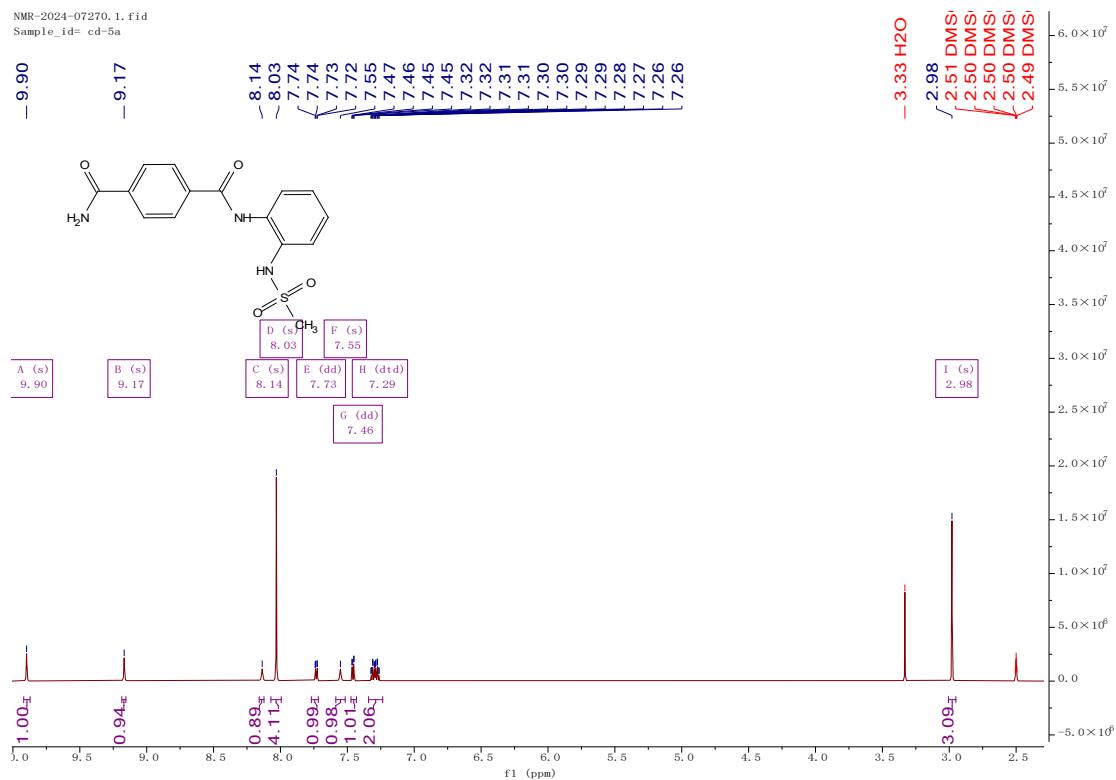

Figure 74.  $^1\text{H}$  NMR spectrum of compound B5

NMR-2024-07402.1.fid  
Sample\_id= cd-5a

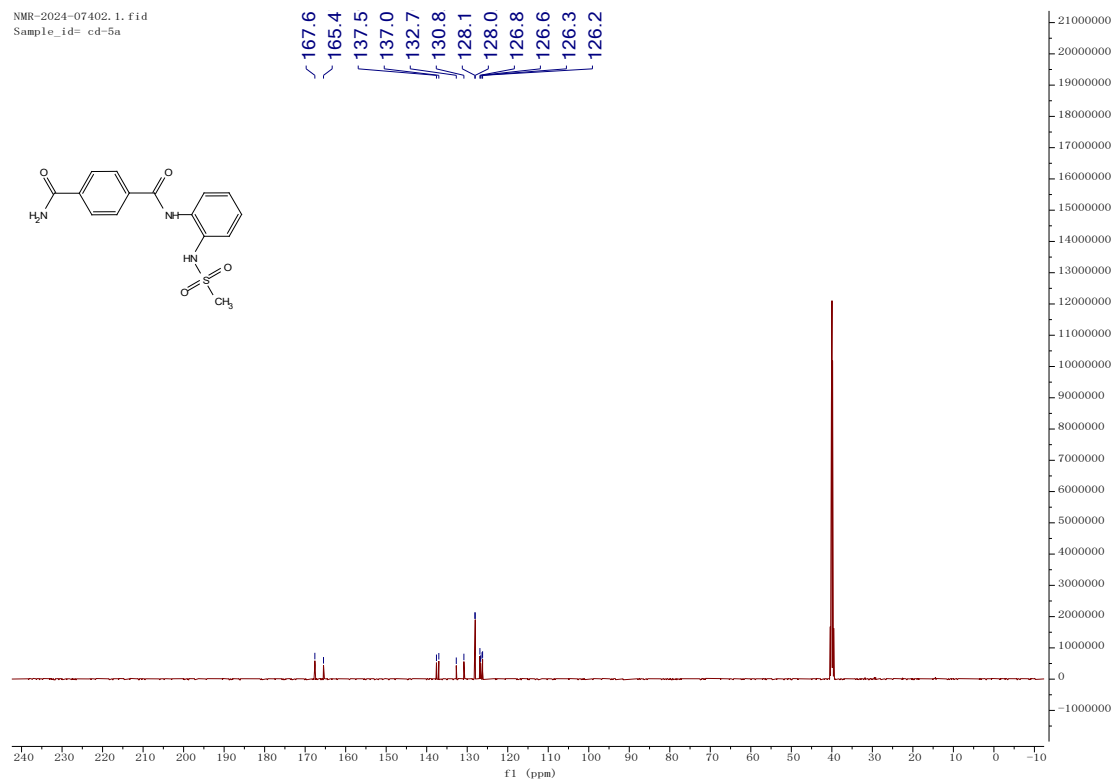

Figure 75.  $^{13}\text{C}$  NMR spectrum of compound B5

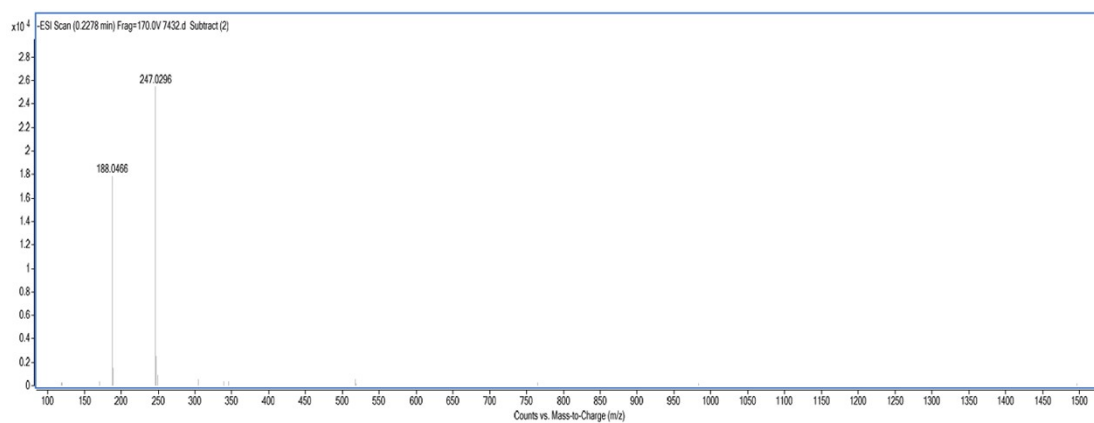

**Figure 76.** HRMS spectrum of compound **B6**

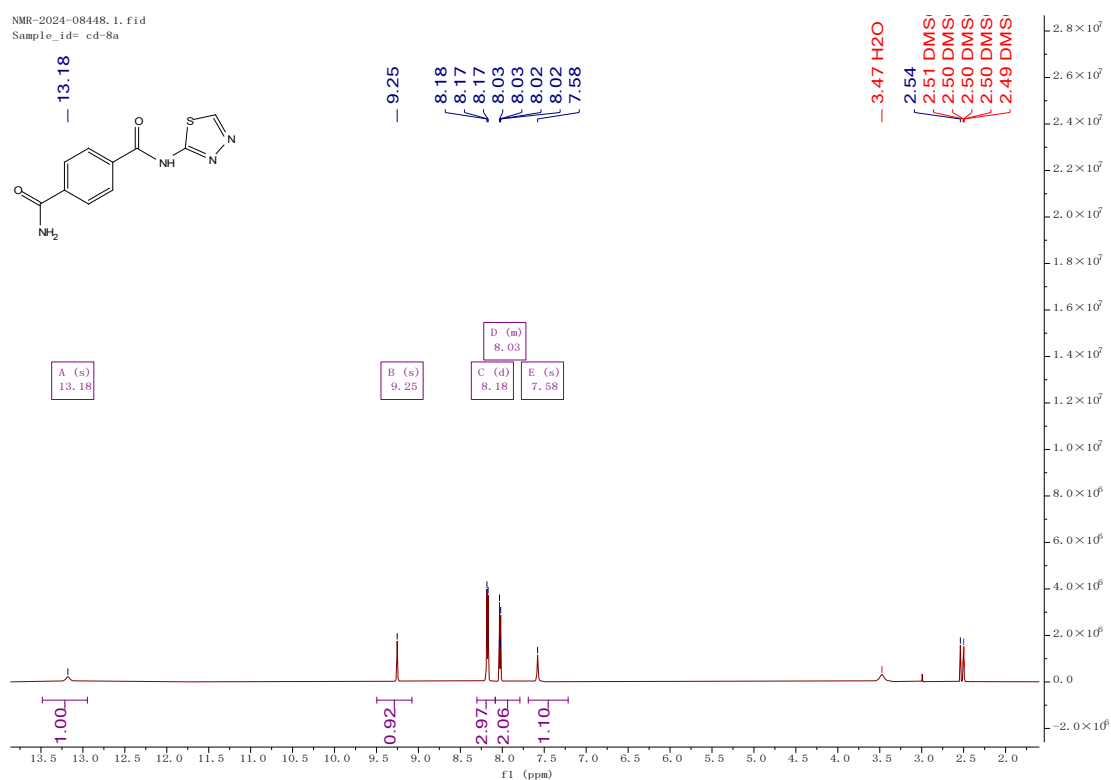

**Figure 77.** <sup>1</sup>H NMR spectrum of compound **B6**

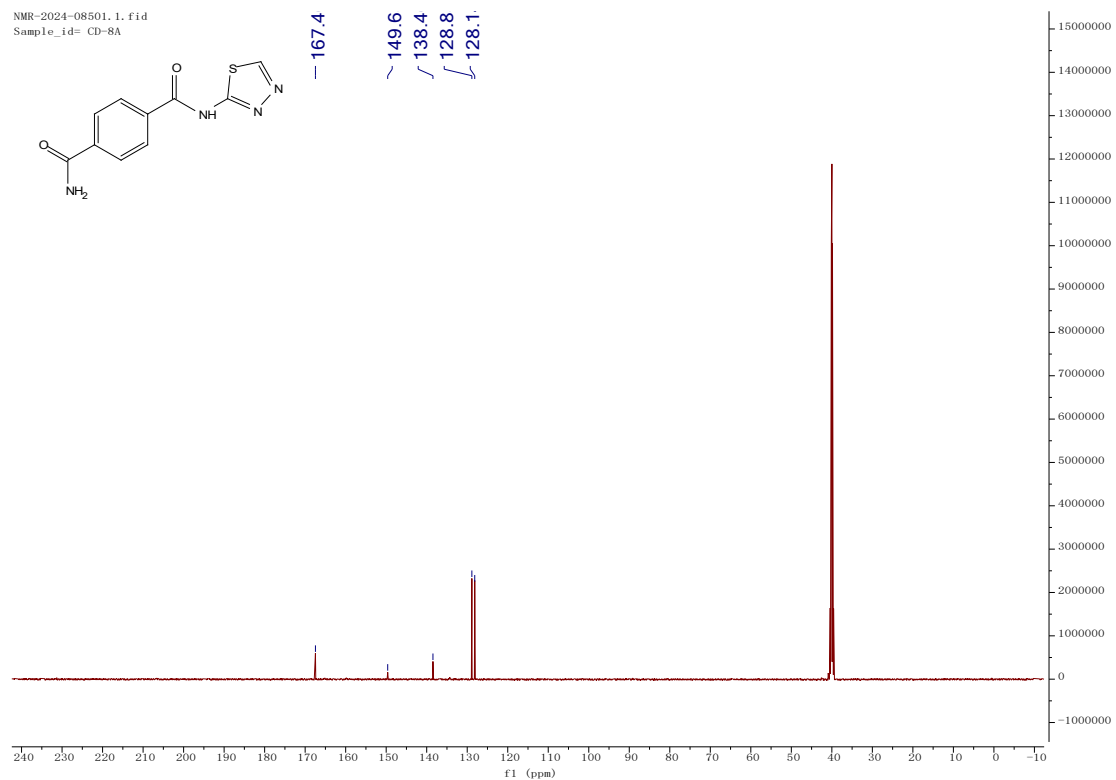

**Figure 78.**  $^{13}\text{C}$  NMR spectrum of compound **B6**

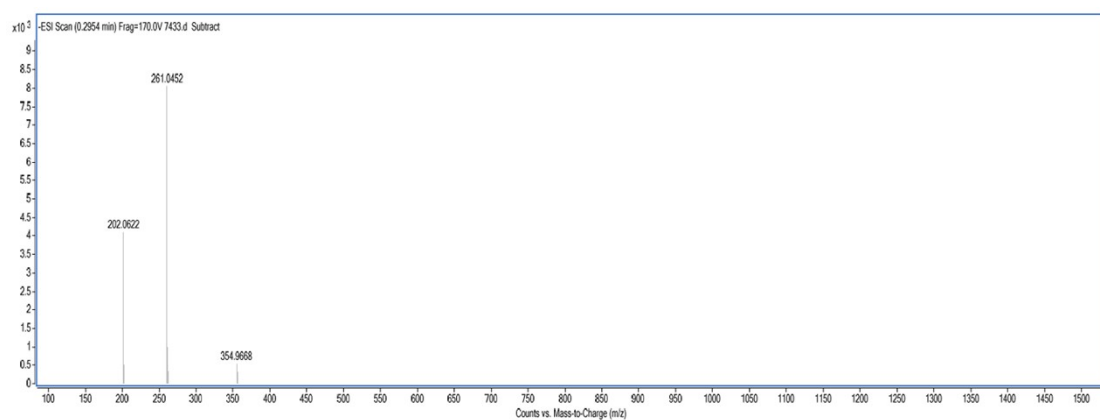

**Figure 79.** HRMS spectrum of compound **B7**

NMR-2024-08241.1.fid  
Sample\_id= cd-9a

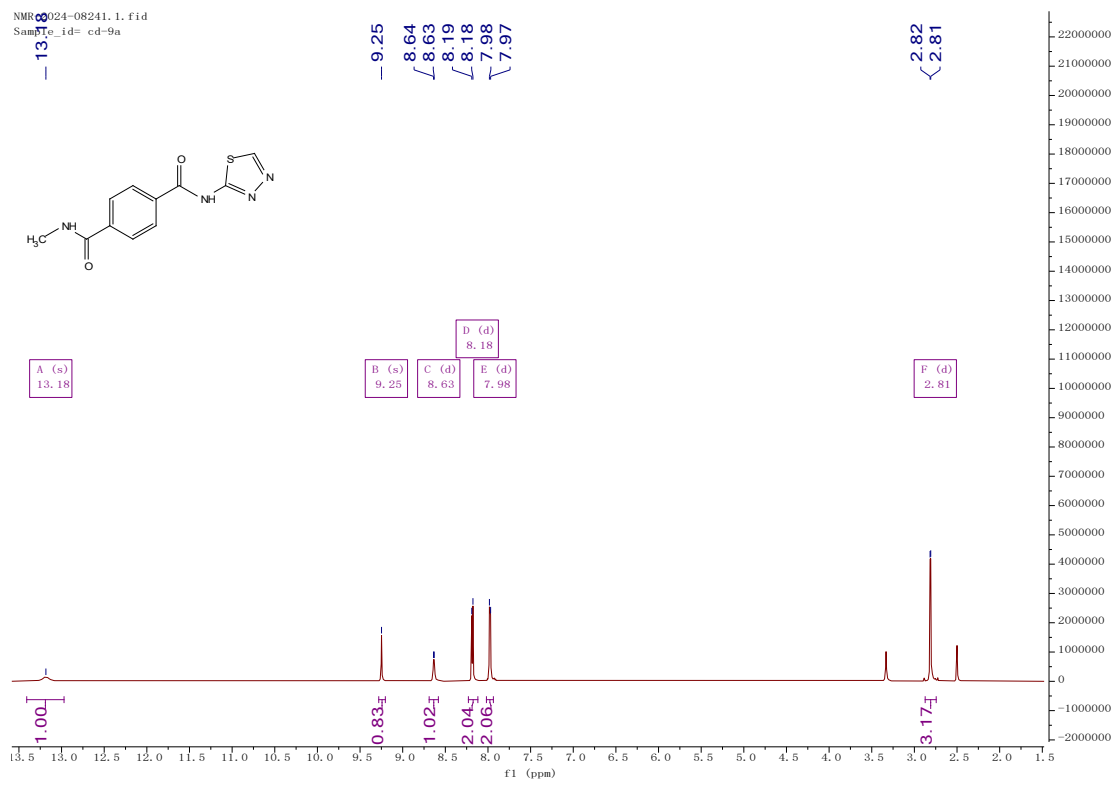

Figure 80. <sup>1</sup>H NMR spectrum of compound B7

NMR-2024-08317.1.fid  
Sample\_id= cd-9a

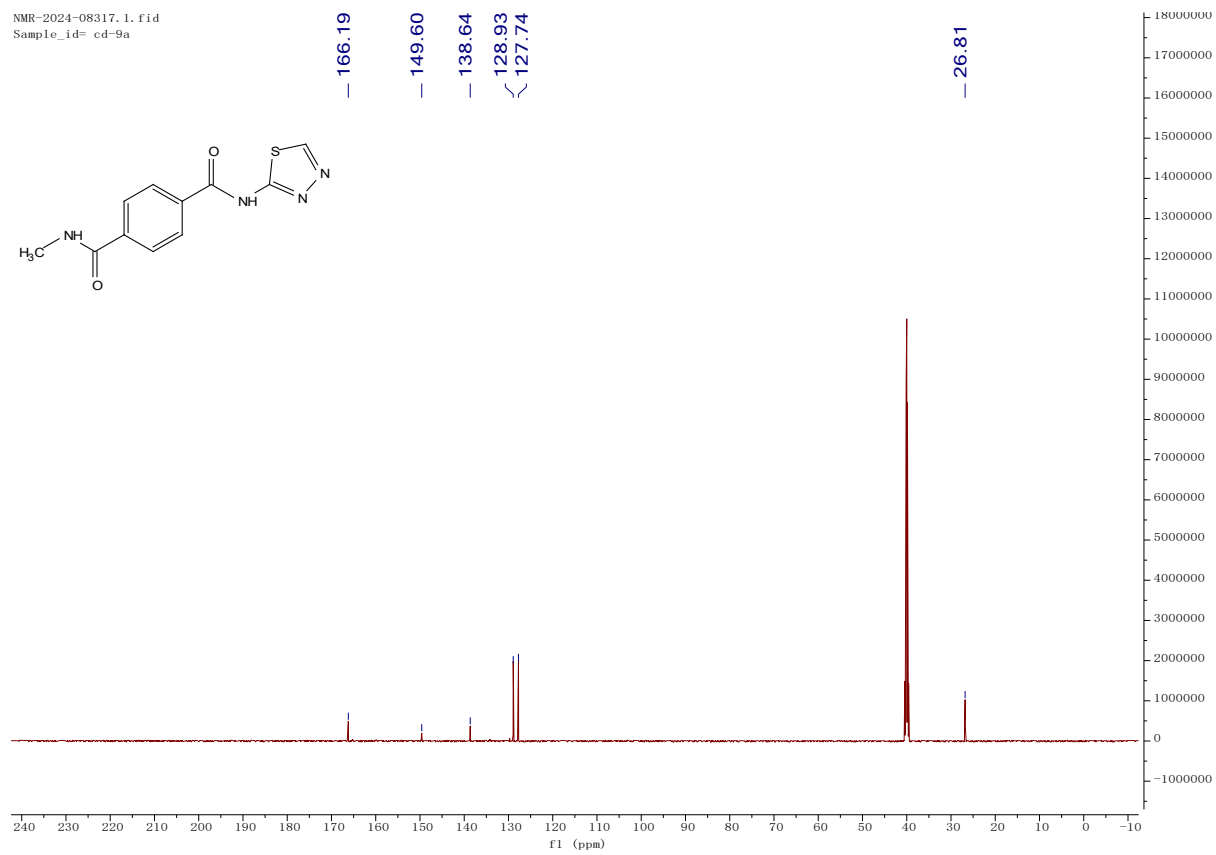

**Figure 81.**  $^{13}\text{C}$  NMR spectrum of compound **B7**

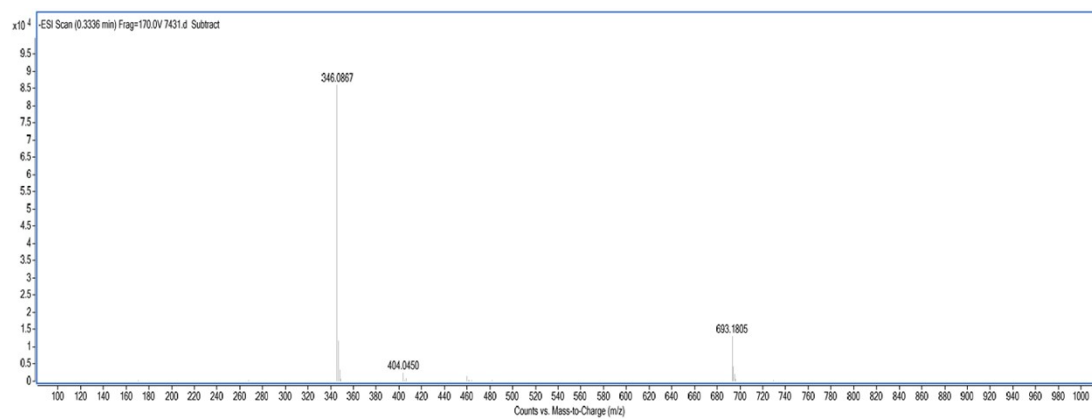

**Figure 82.** HRMS spectrum of compound **B8**

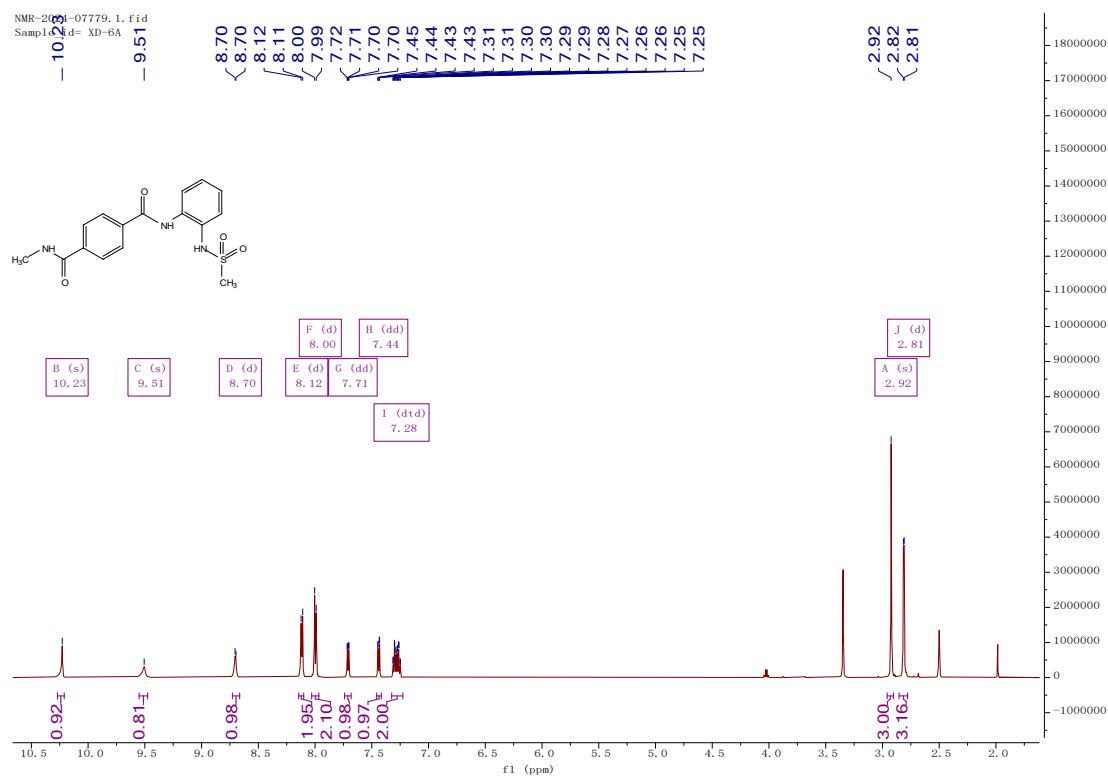

**Figure 83.**  $^1\text{H}$  NMR spectrum of compound **B8**

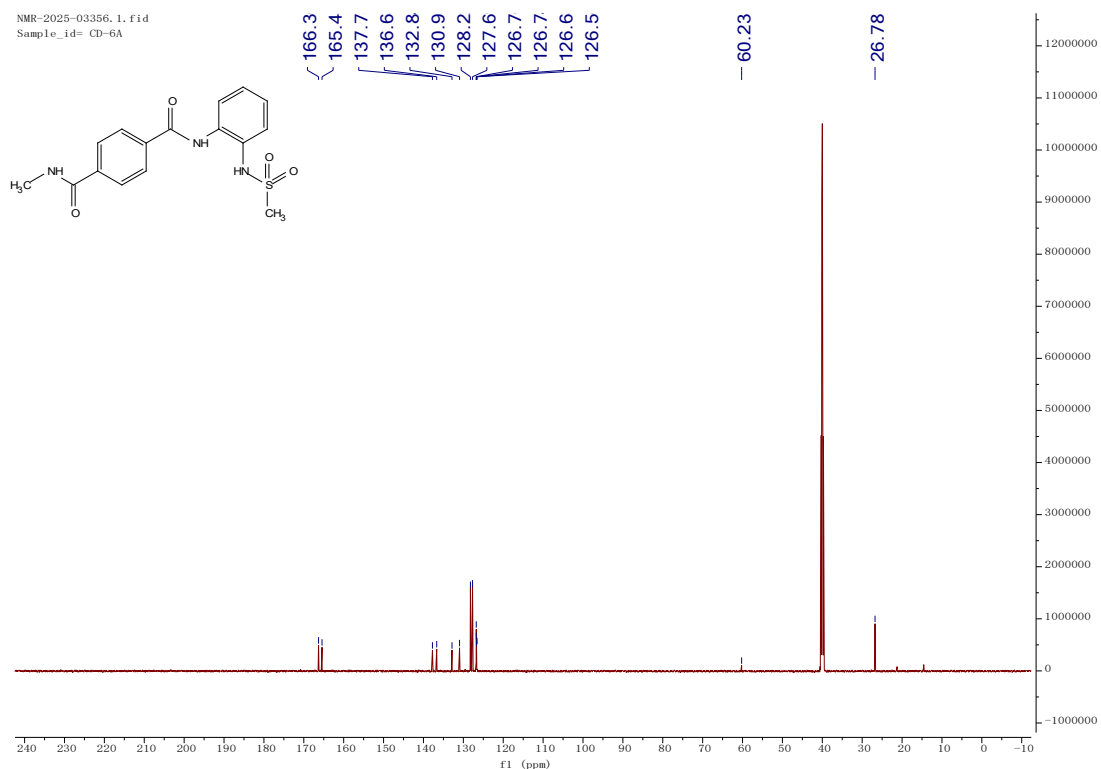

**Figure 84.**  $^{13}\text{C}$  NMR spectrum of compound **B8**

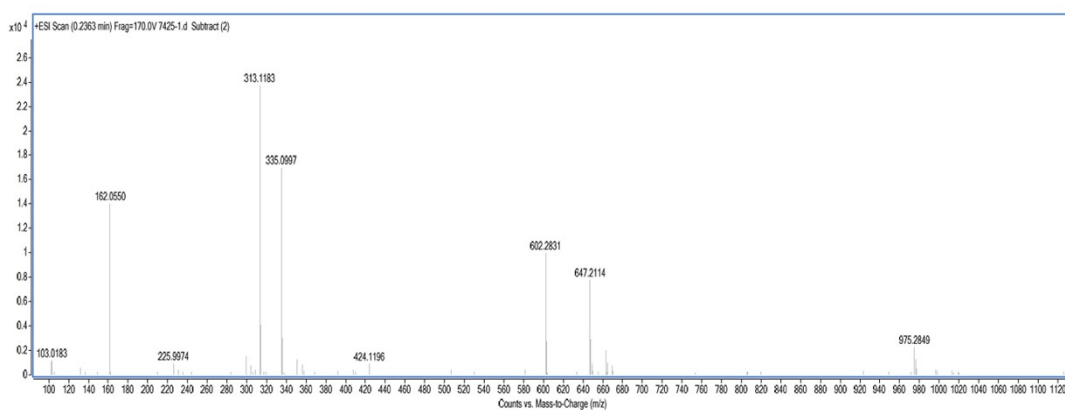

**Figure 85.** HRMS spectrum of compound **B9**

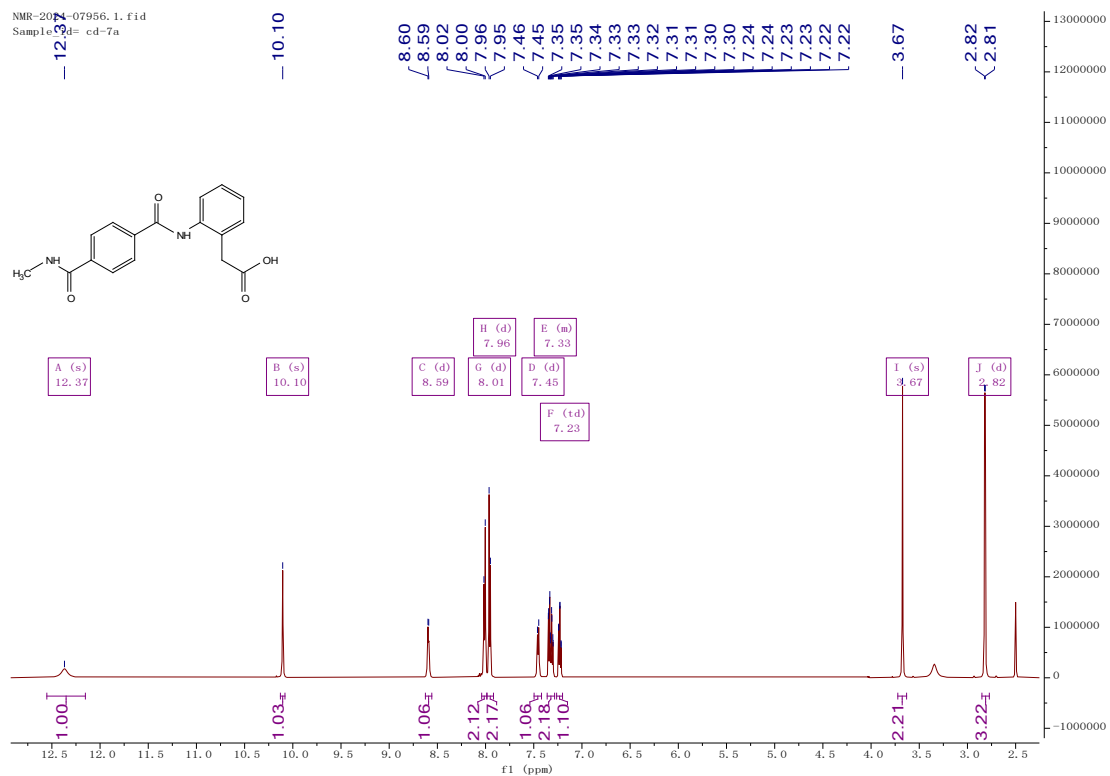

Figure 86. <sup>1</sup>H NMR spectrum of compound B9

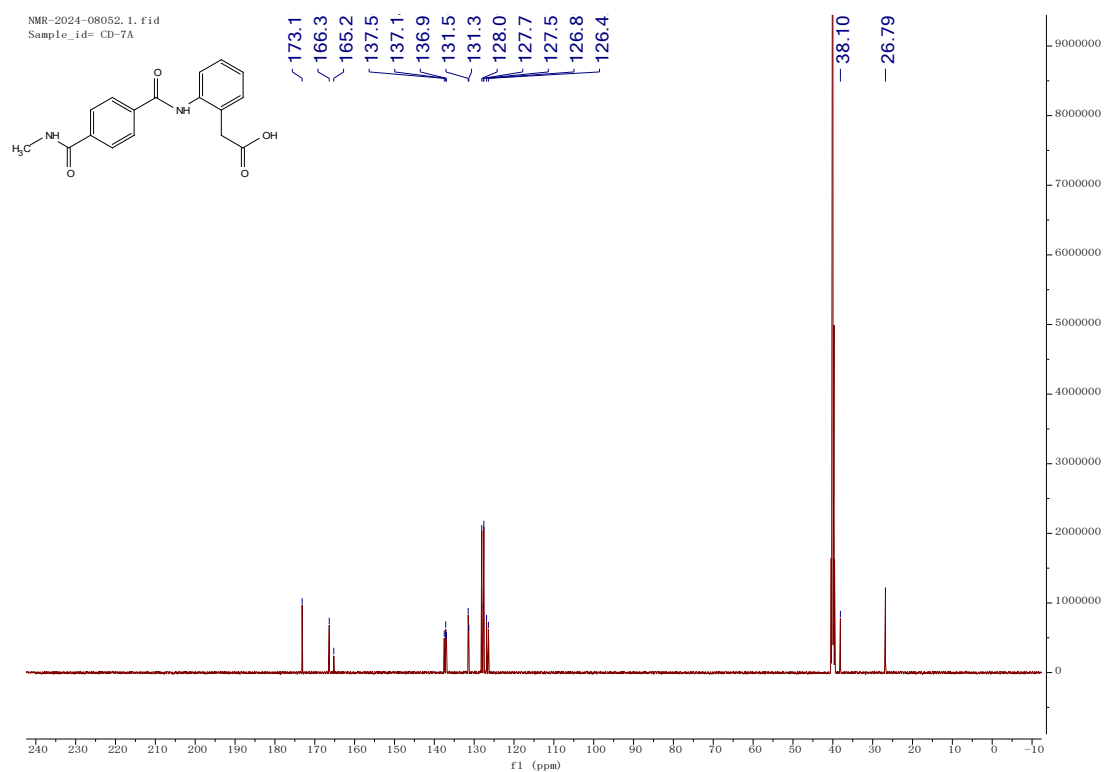

Figure 87. <sup>13</sup>C NMR spectrum of compound B9

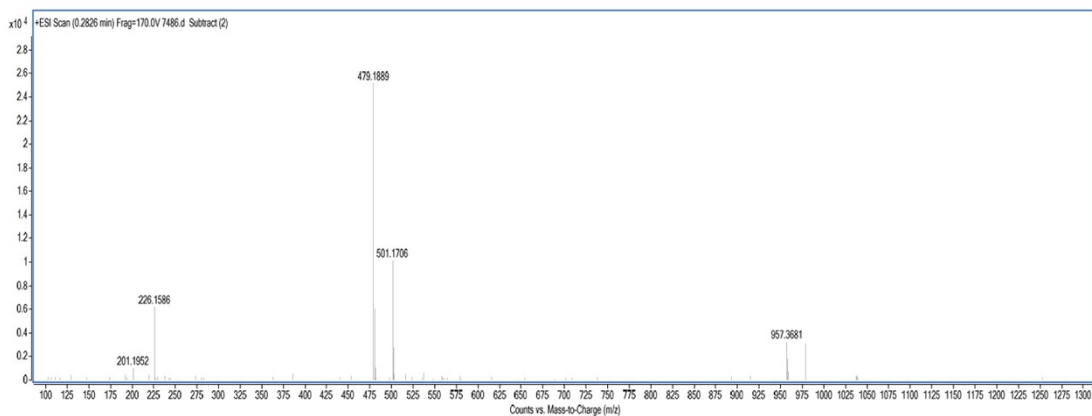

Figure 88. HRMS spectrum of compound C1

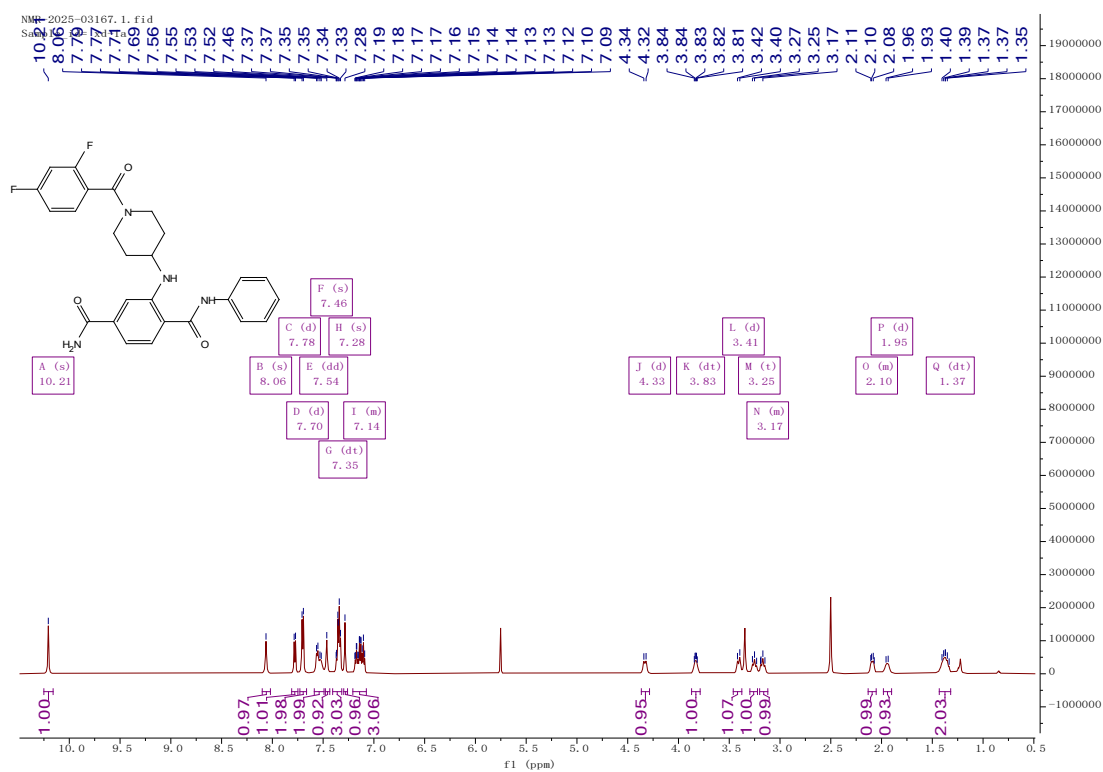

Figure 89. <sup>1</sup>H NMR spectrum of compound C1

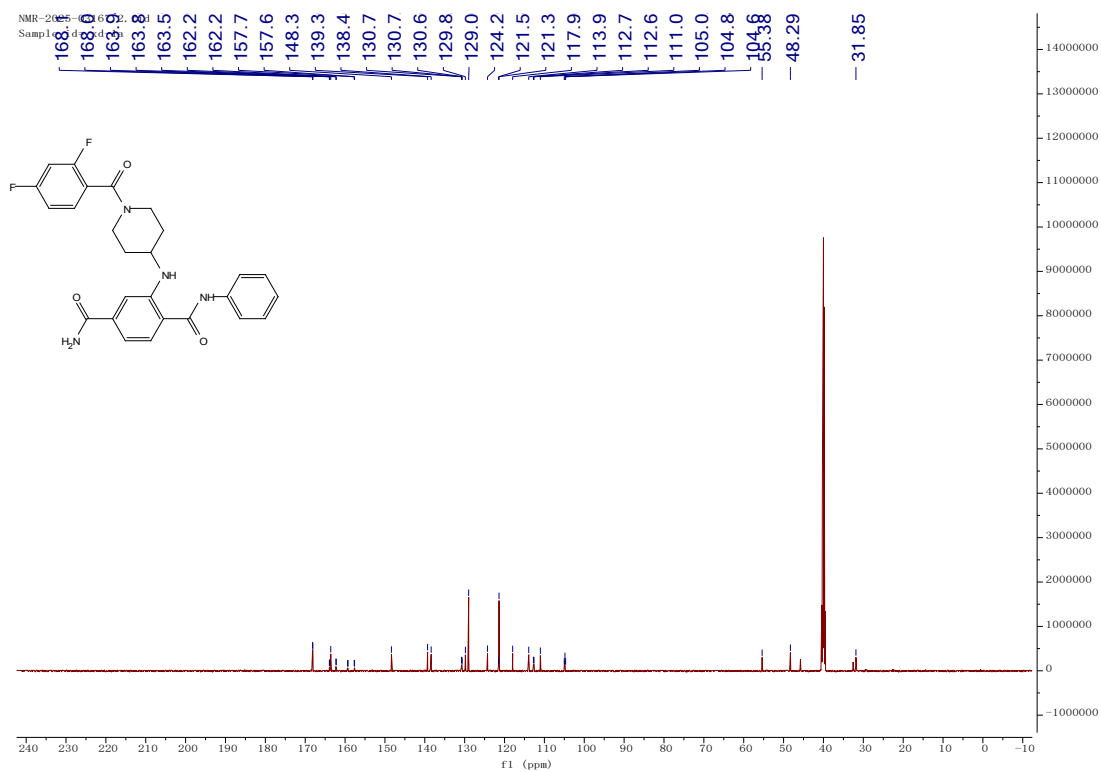

**Figure 90.** <sup>13</sup>C NMR spectrum of compound C1

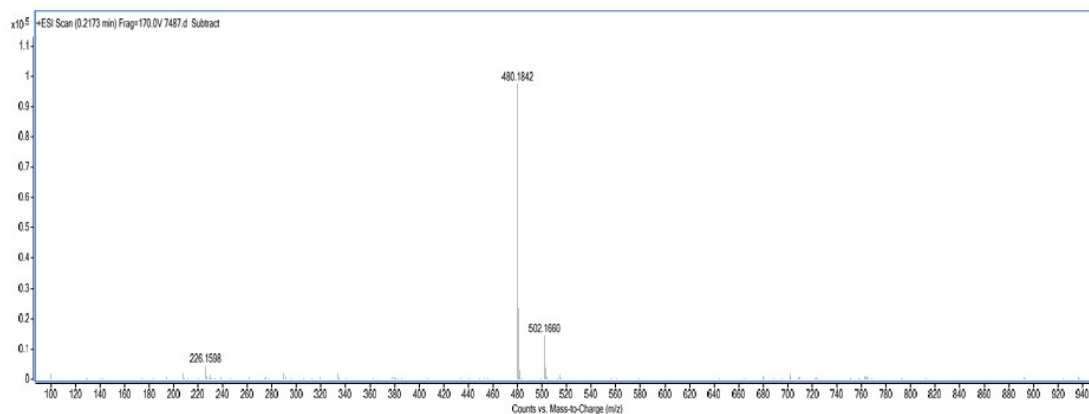

**Figure 91.** HRMS spectrum of compound C2

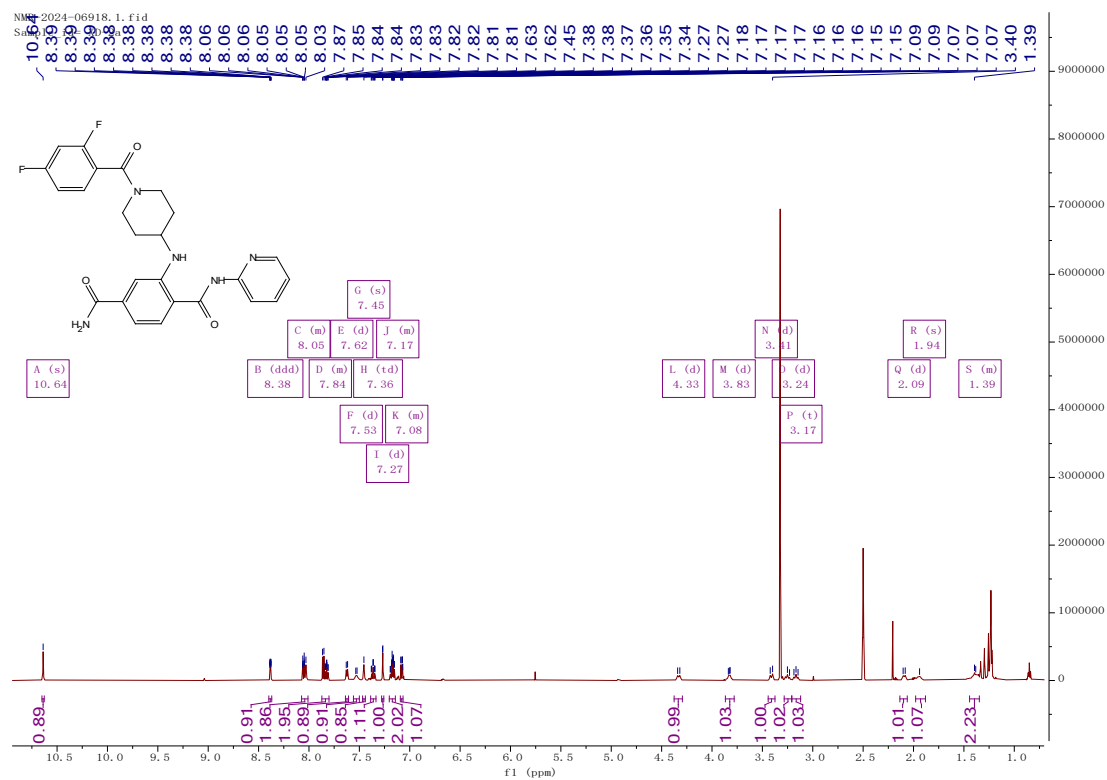

Figure 92. <sup>1</sup>H NMR spectrum of compound C2

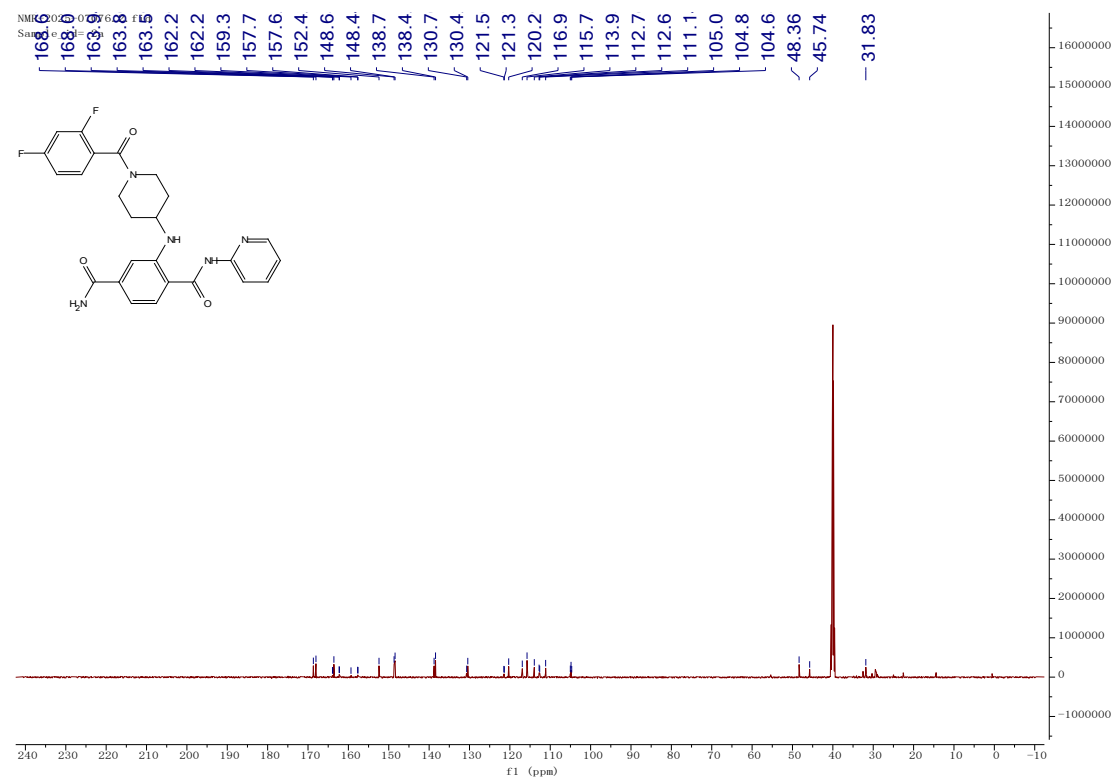

Figure 93. <sup>13</sup>C NMR spectrum of compound C2

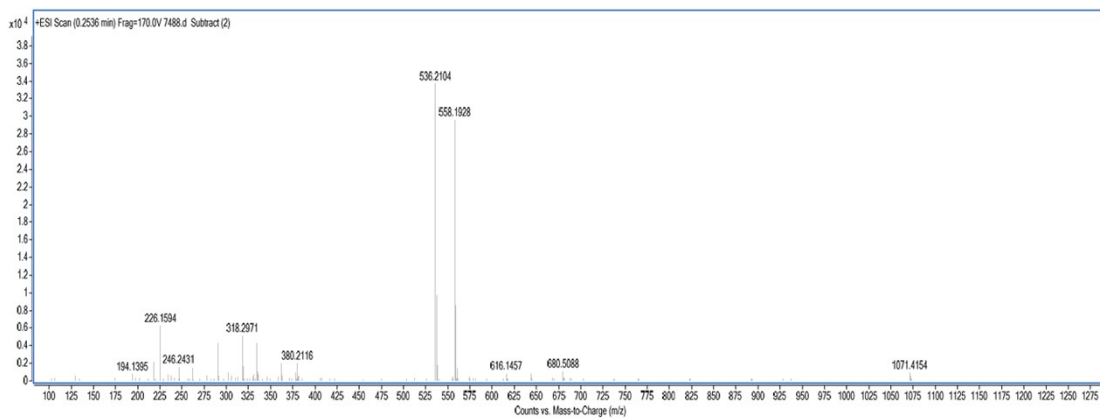

Figure 94. HRMS spectrum of compound C3

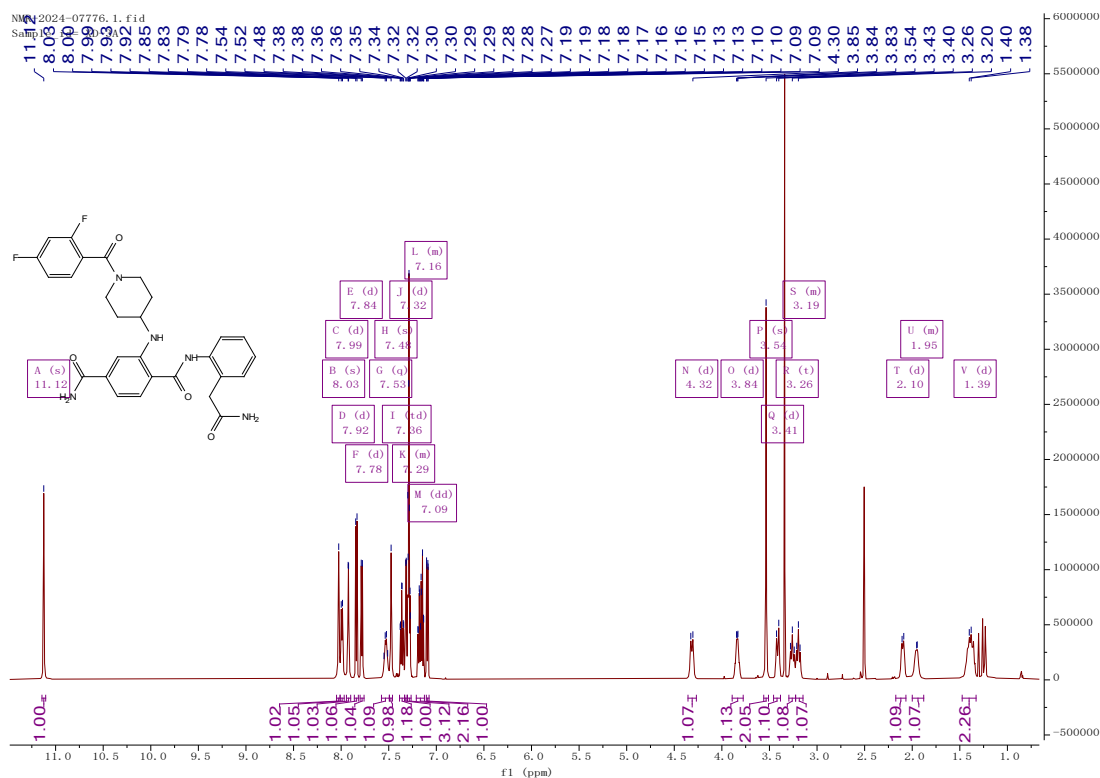

Figure 95. <sup>1</sup>H NMR spectrum of compound C3

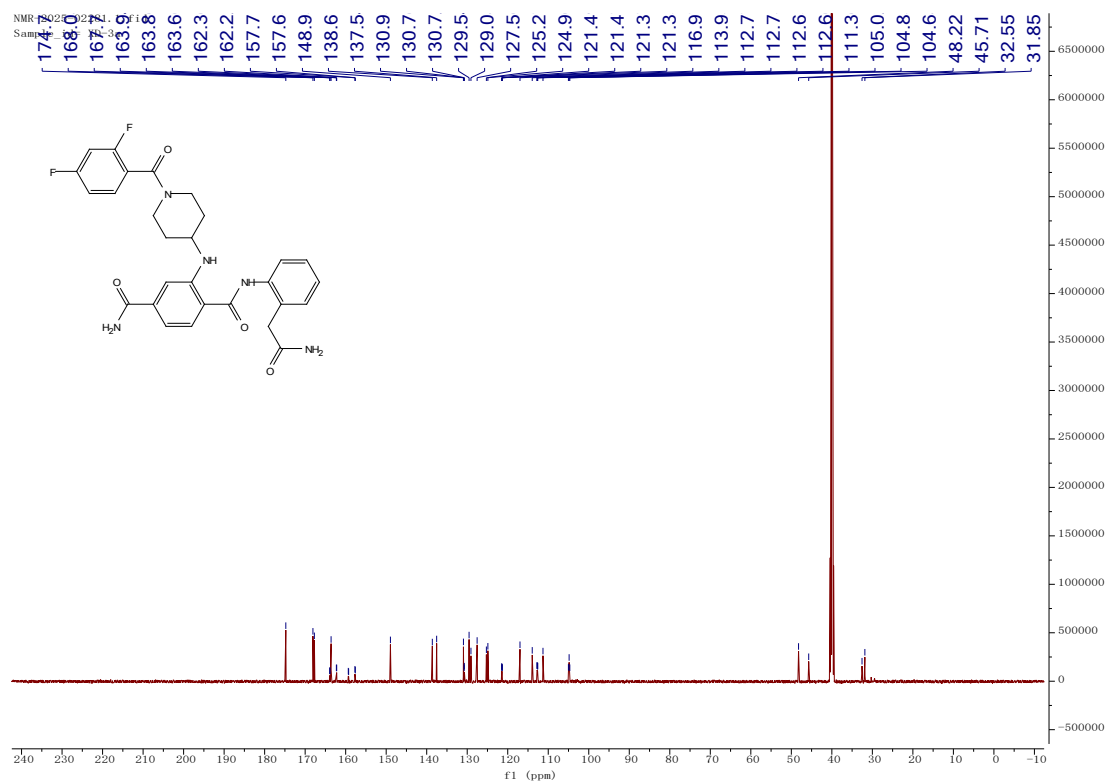

**Figure 96.**  $^{13}\text{C}$  NMR spectrum of compound C3

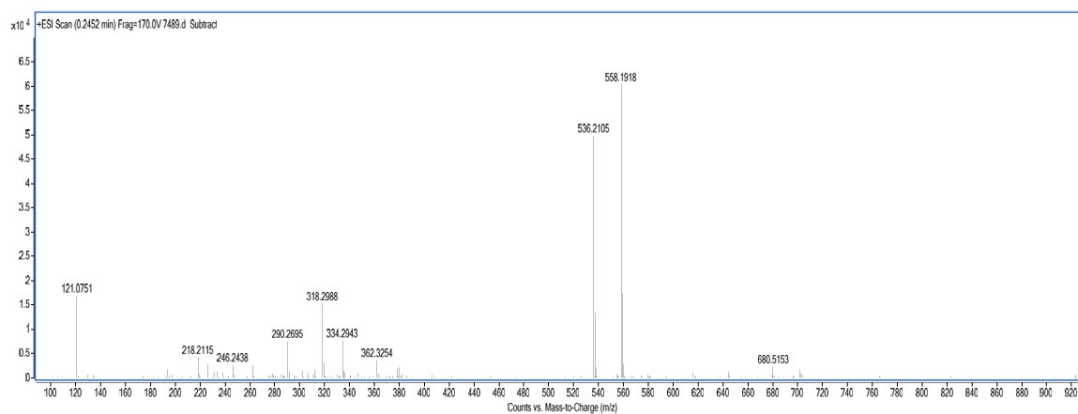

**Figure 97.** HRMS spectrum of compound C4

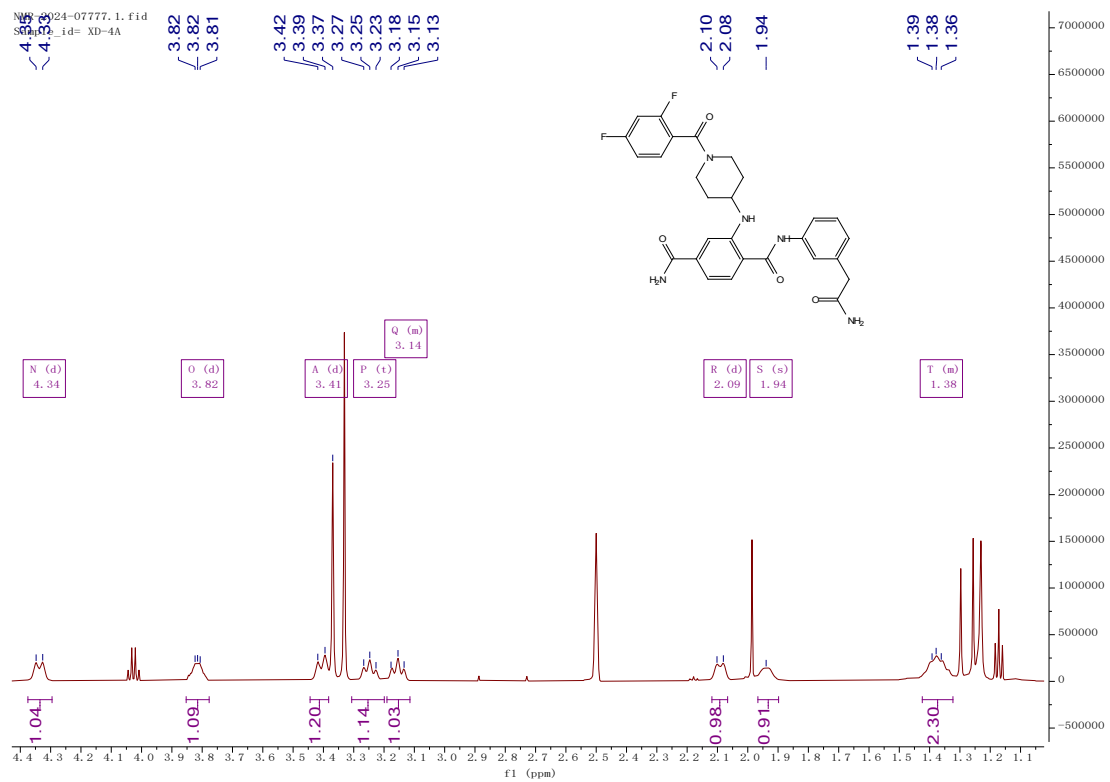

Figure 98. <sup>1</sup>H NMR spectrum of compound C4

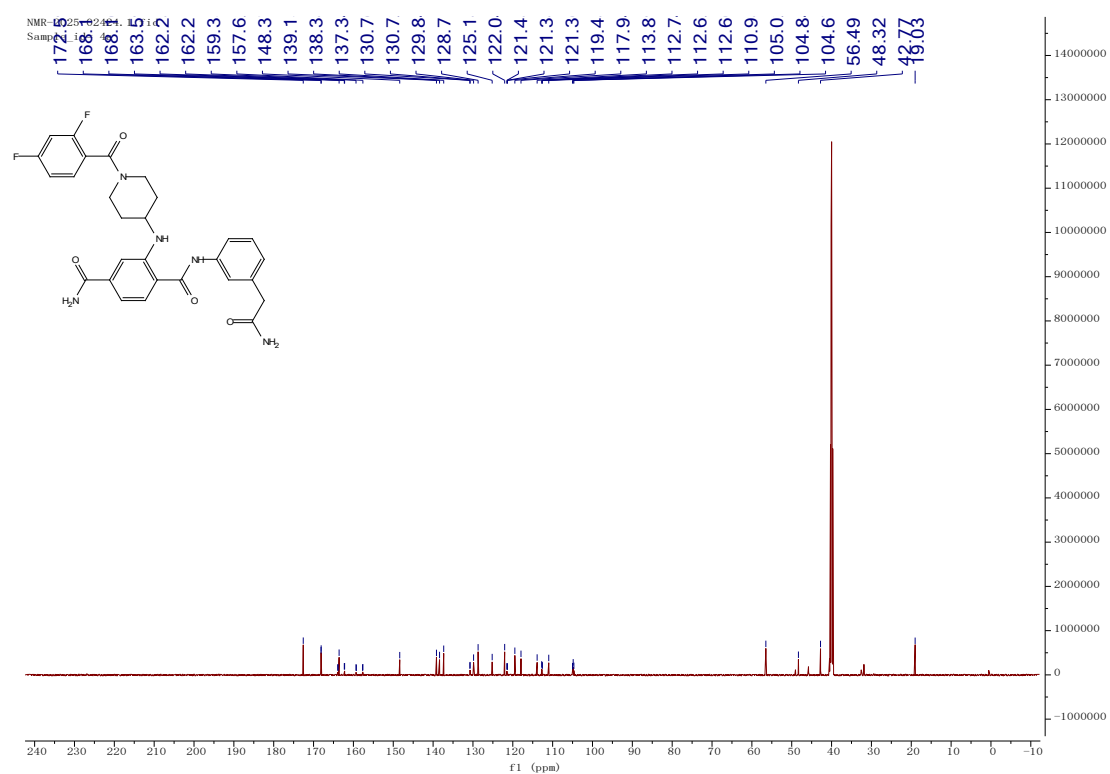

Figure 99. <sup>13</sup>C NMR spectrum of compound C4

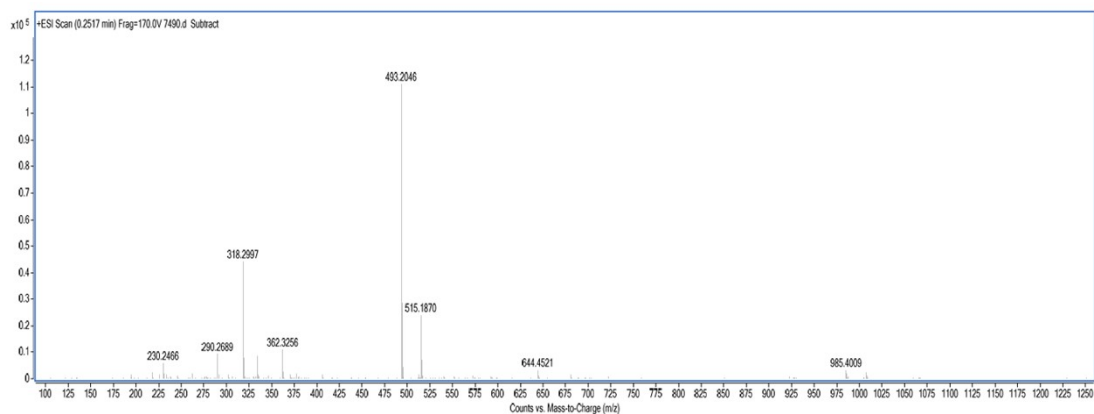

Figure 100. HRMS spectrum of compound C5

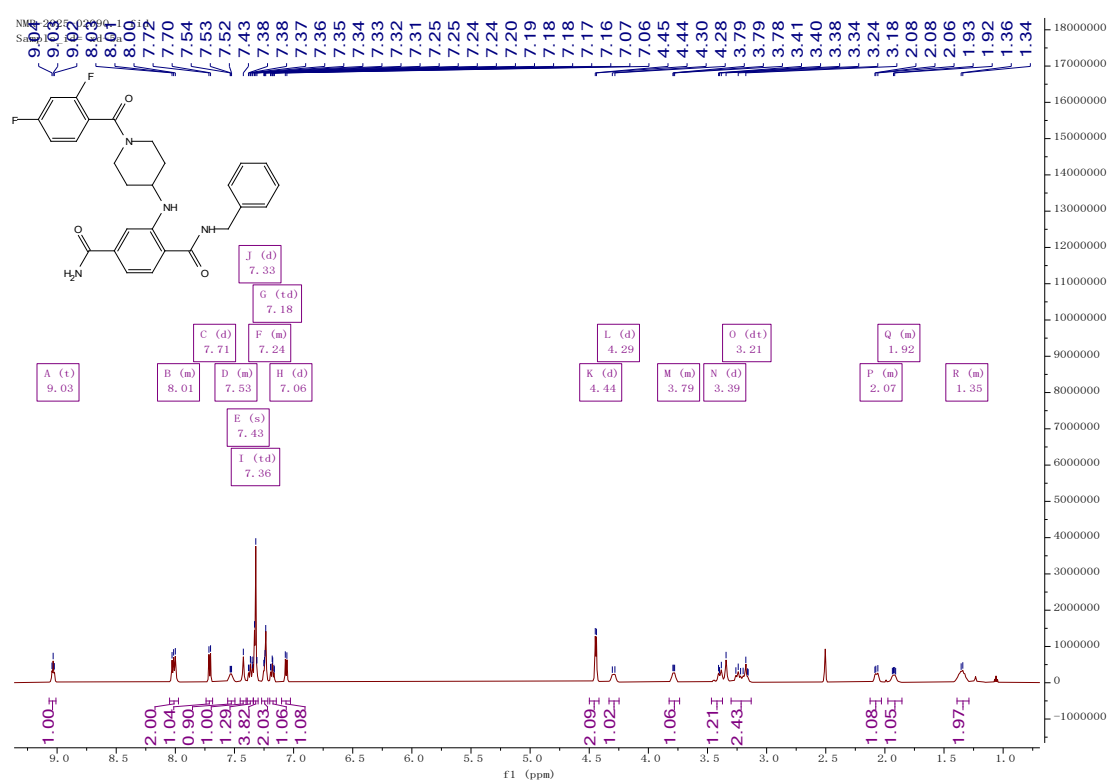

Figure 101. <sup>1</sup>H NMR spectrum of compound C5

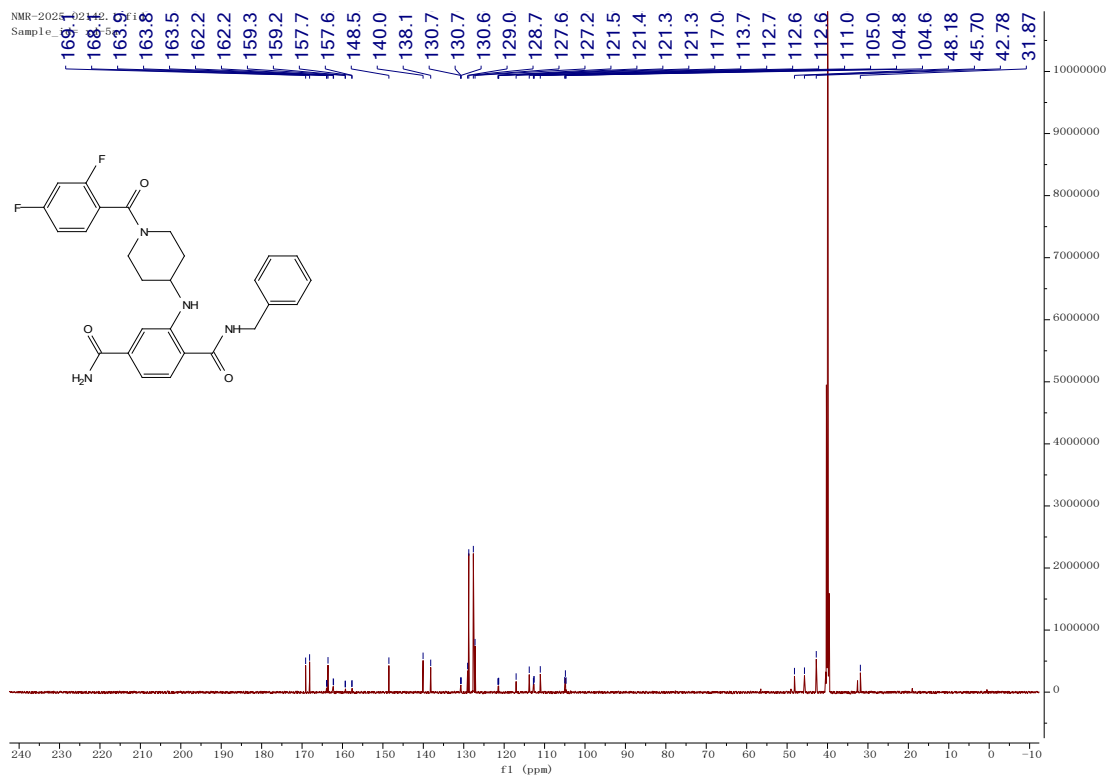

**Figure 102.**  $^{13}\text{C}$  NMR spectrum of compound C5

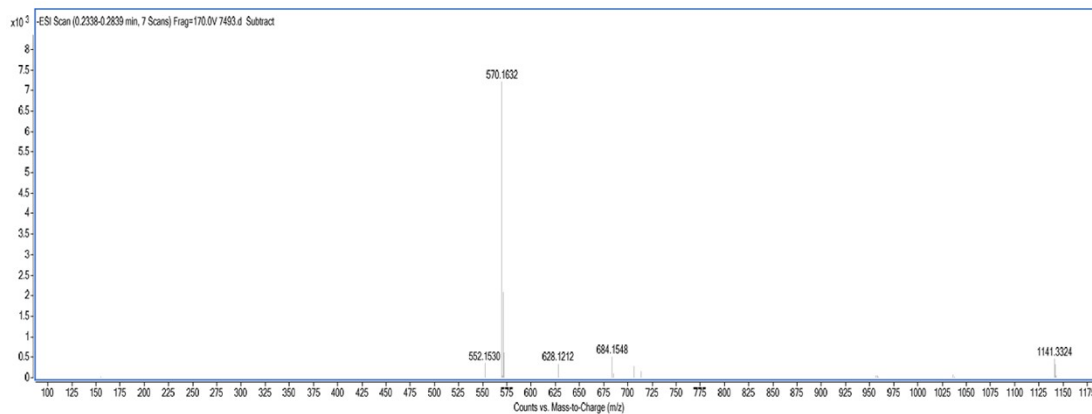

**Figure 103.** HRMS spectrum of compound C6

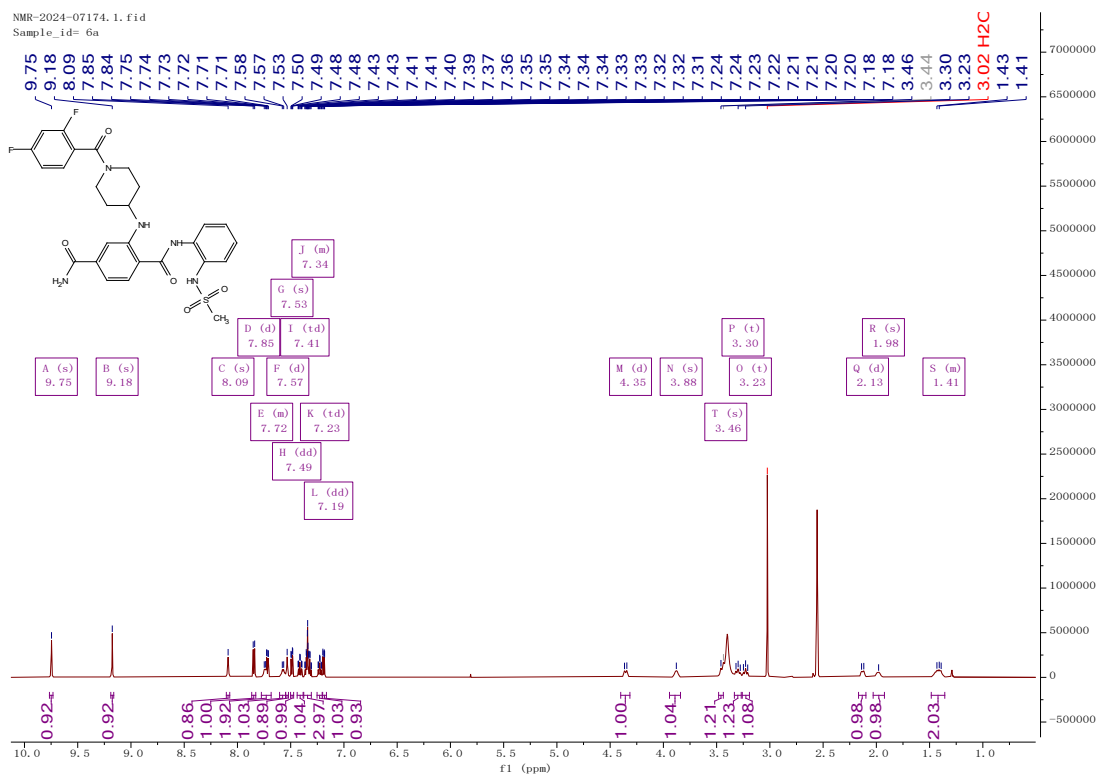

Figure 104.  $^1\text{H}$  NMR spectrum of compound C6

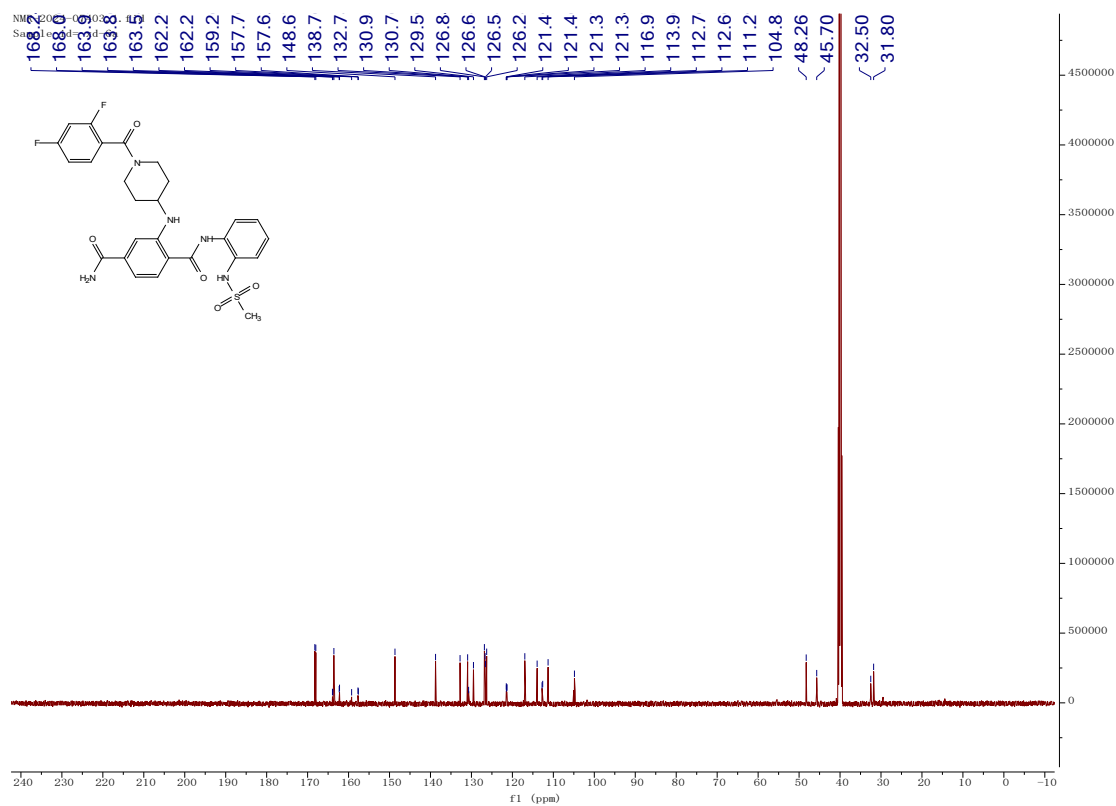

Figure 105.  $^{13}\text{C}$  NMR spectrum of compound C6

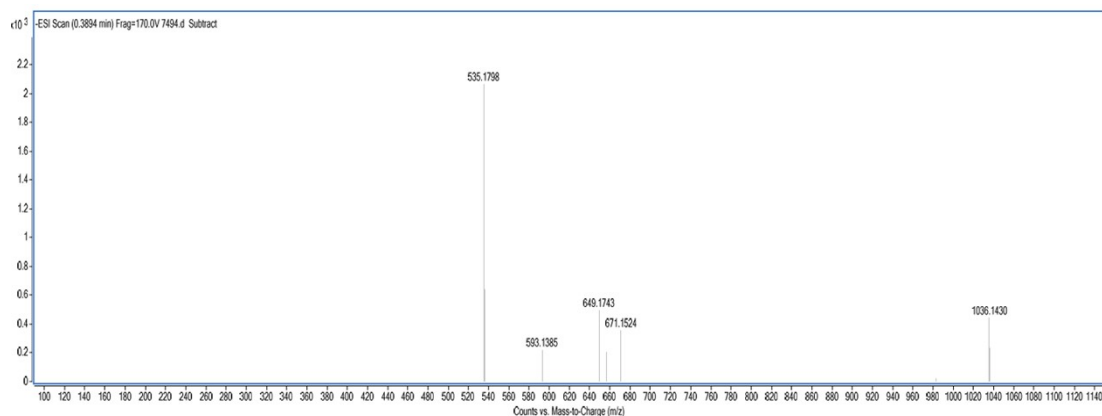

Figure 106. HRMS spectrum of compound C7

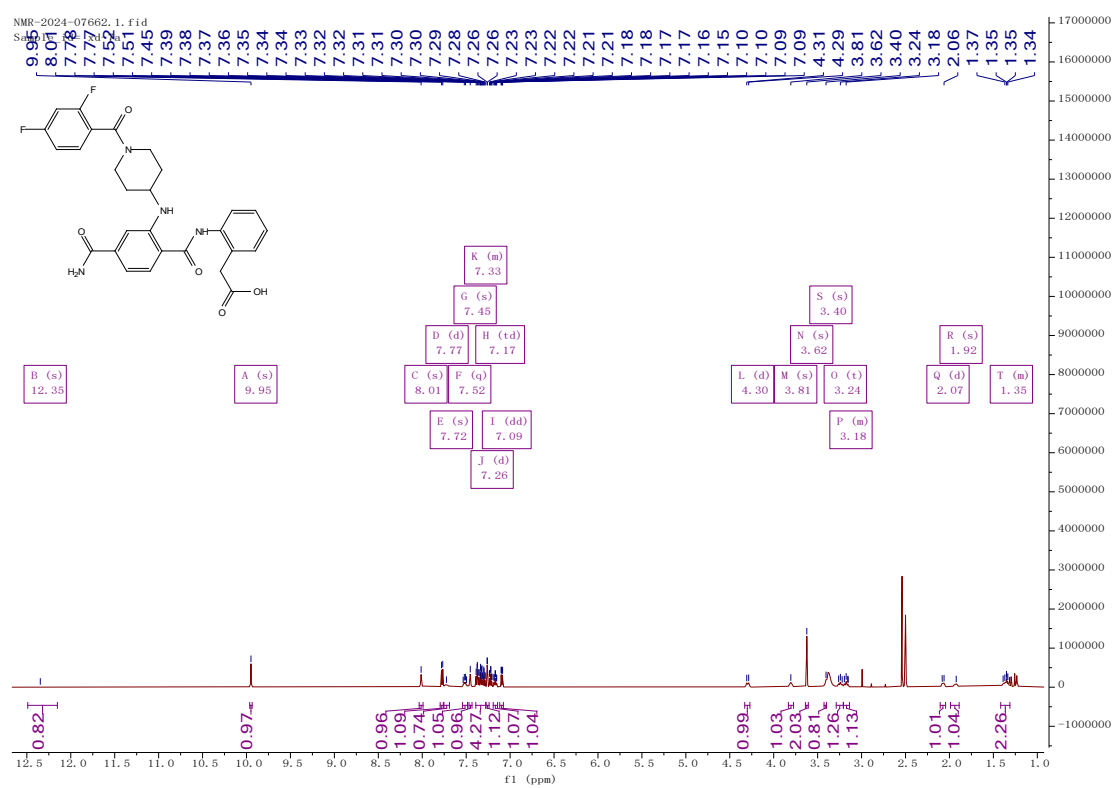

Figure 107. <sup>1</sup>H NMR spectrum of compound C7

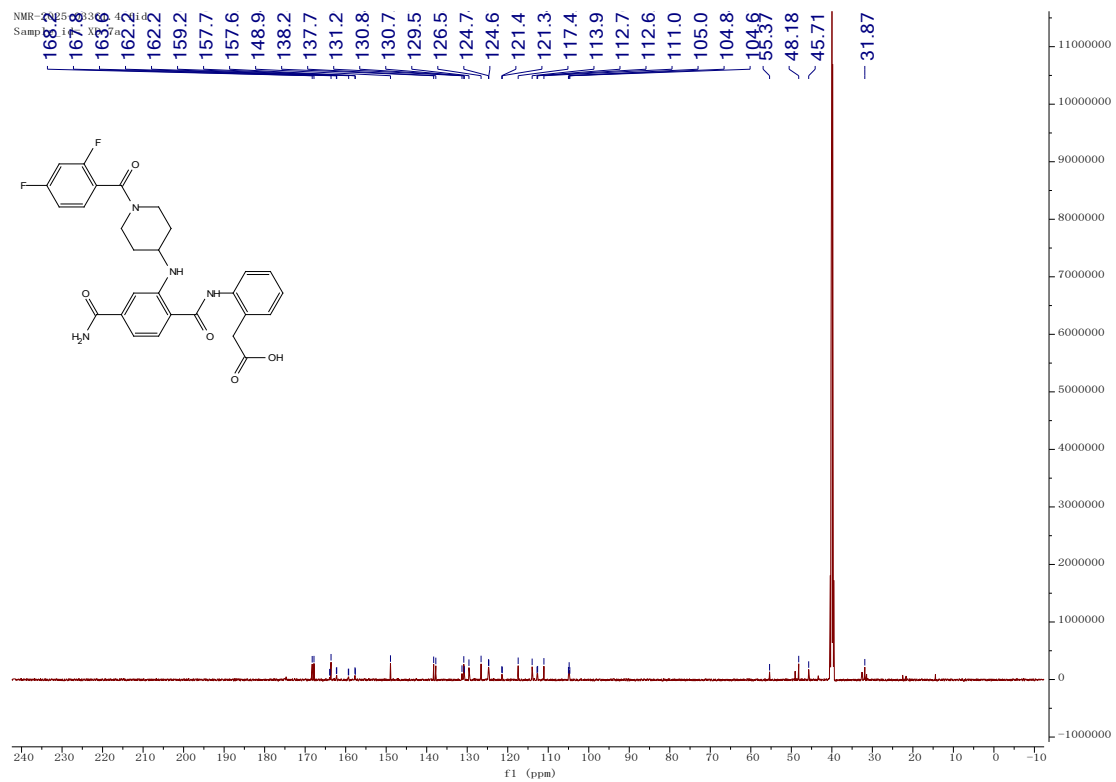

**Figure 108.**  $^{13}\text{C}$  NMR spectrum of compound C7

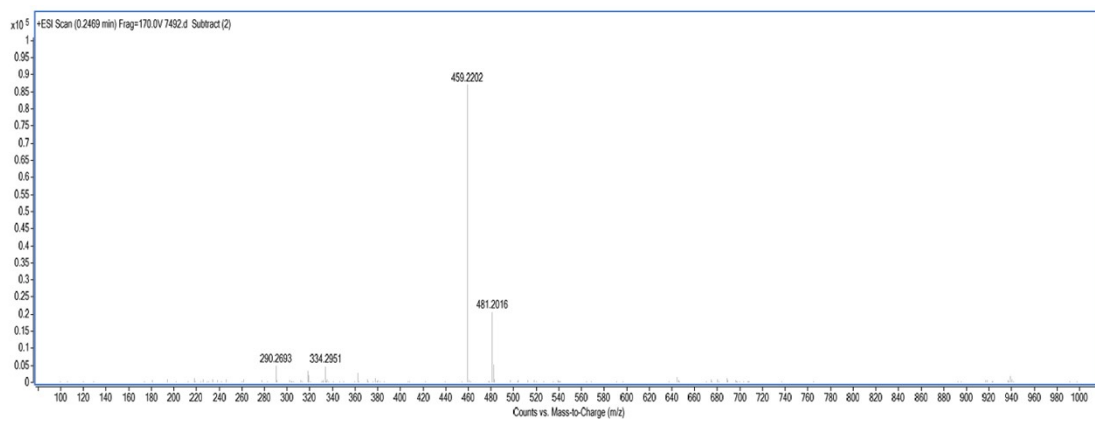

**Figure 109.** HRMS spectrum of compound C8

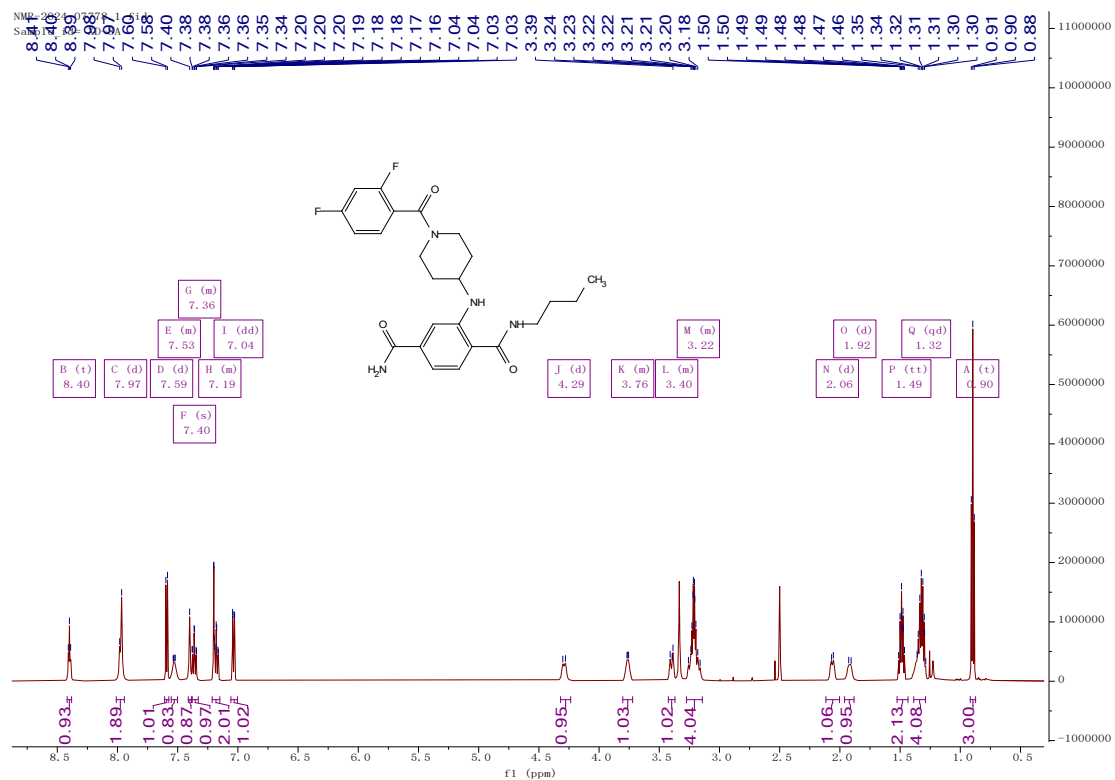

Figure 110. <sup>1</sup>H NMR spectrum of compound C8

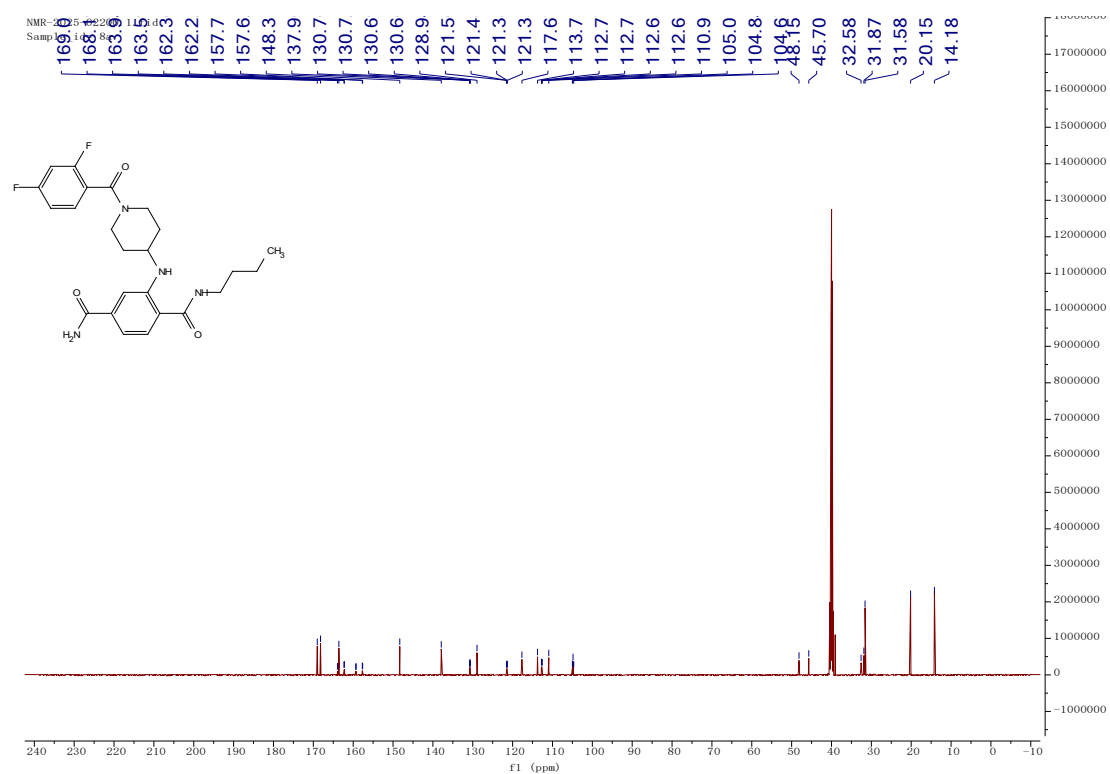

Figure 111. <sup>13</sup>C NMR spectrum of compound C8

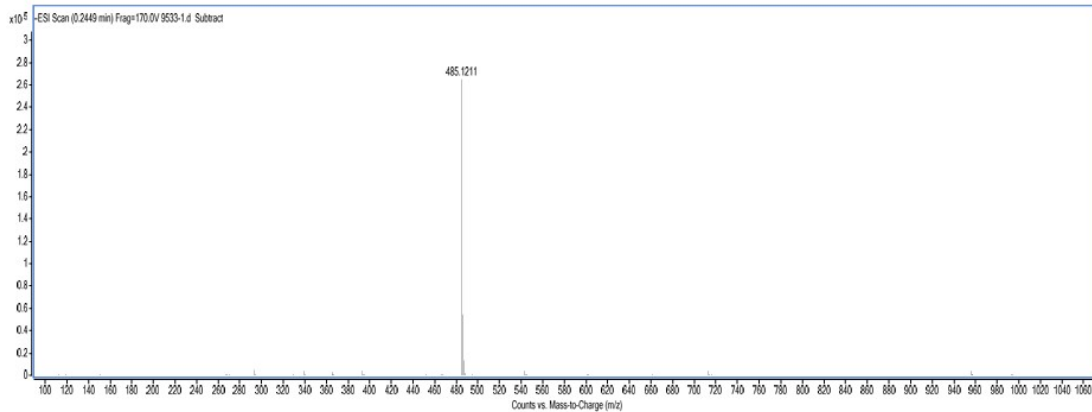

Figure 112. HRMS spectrum of compound C9

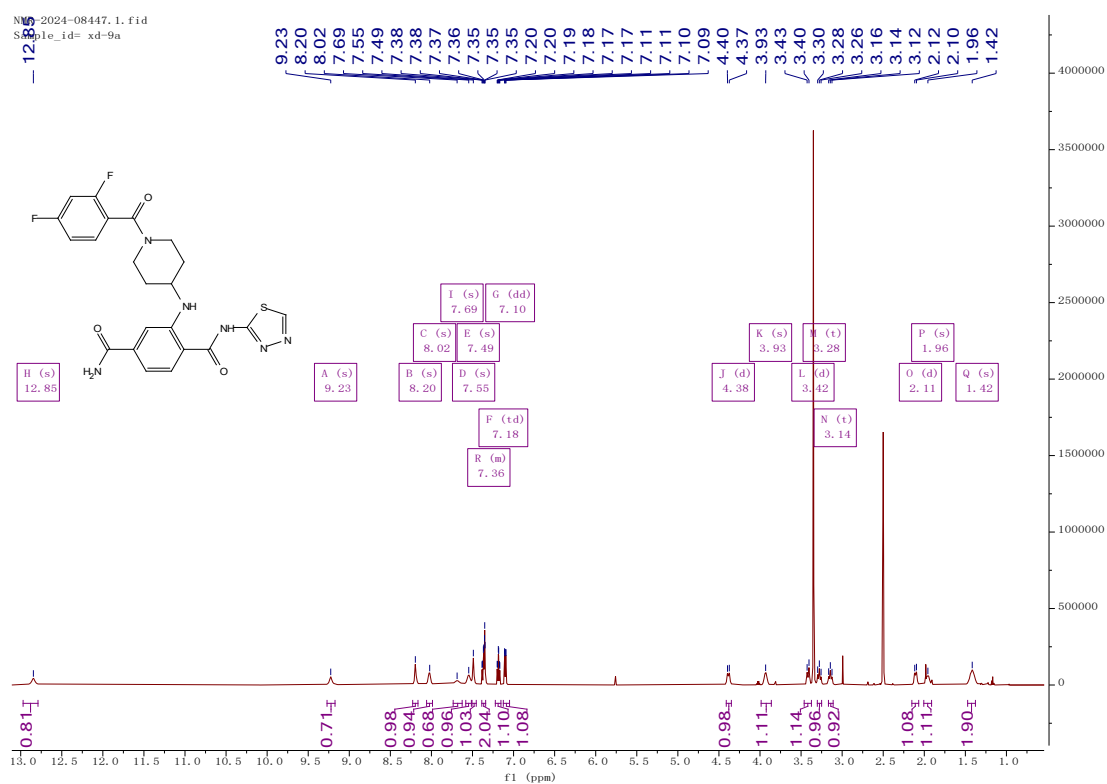

Figure 113. <sup>1</sup>H NMR spectrum of compound C9

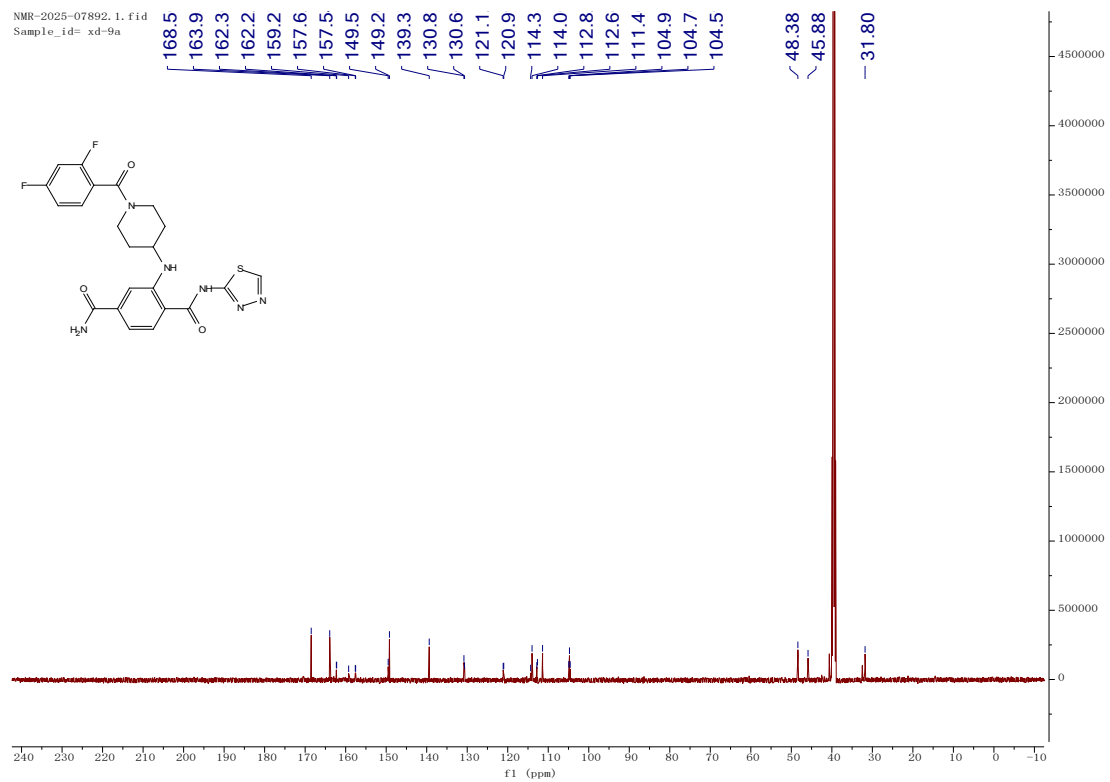

Figure 114.  $^{13}\text{C}$  NMR spectrum of compound C9

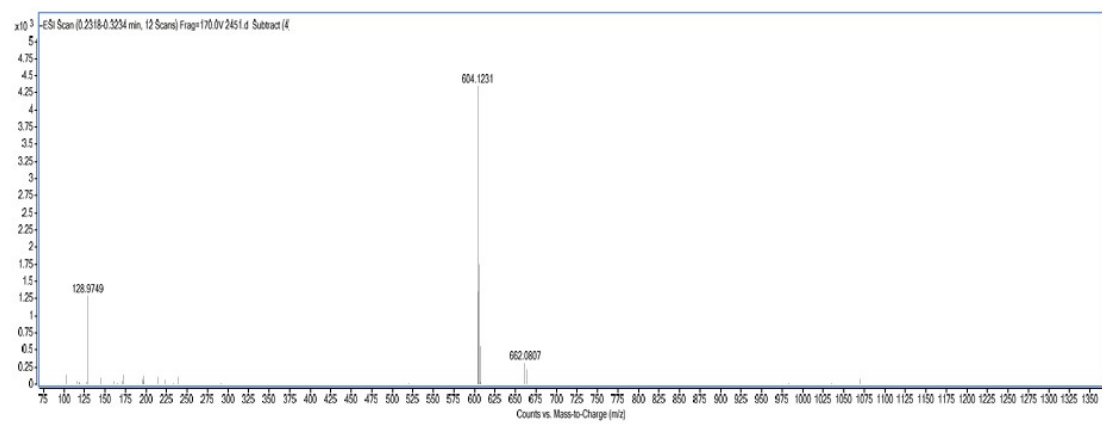

Figure 115. HRMS spectrum of compound C10

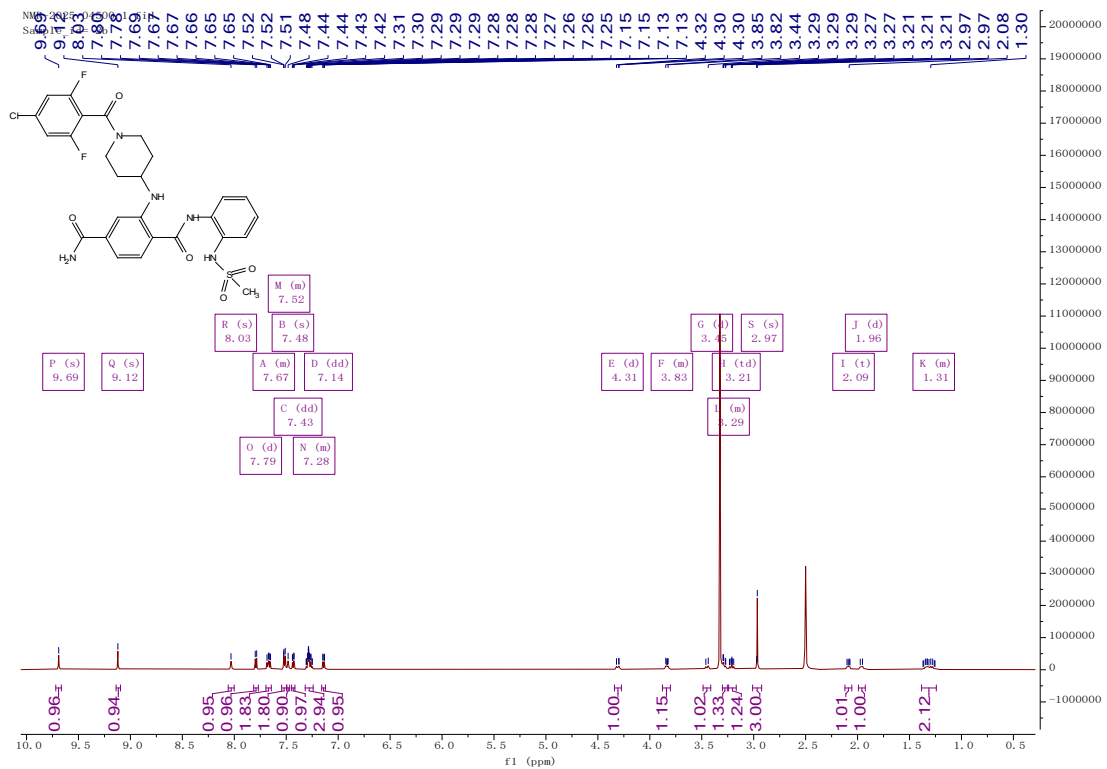

Figure 116. <sup>1</sup>H NMR spectrum of compound C10

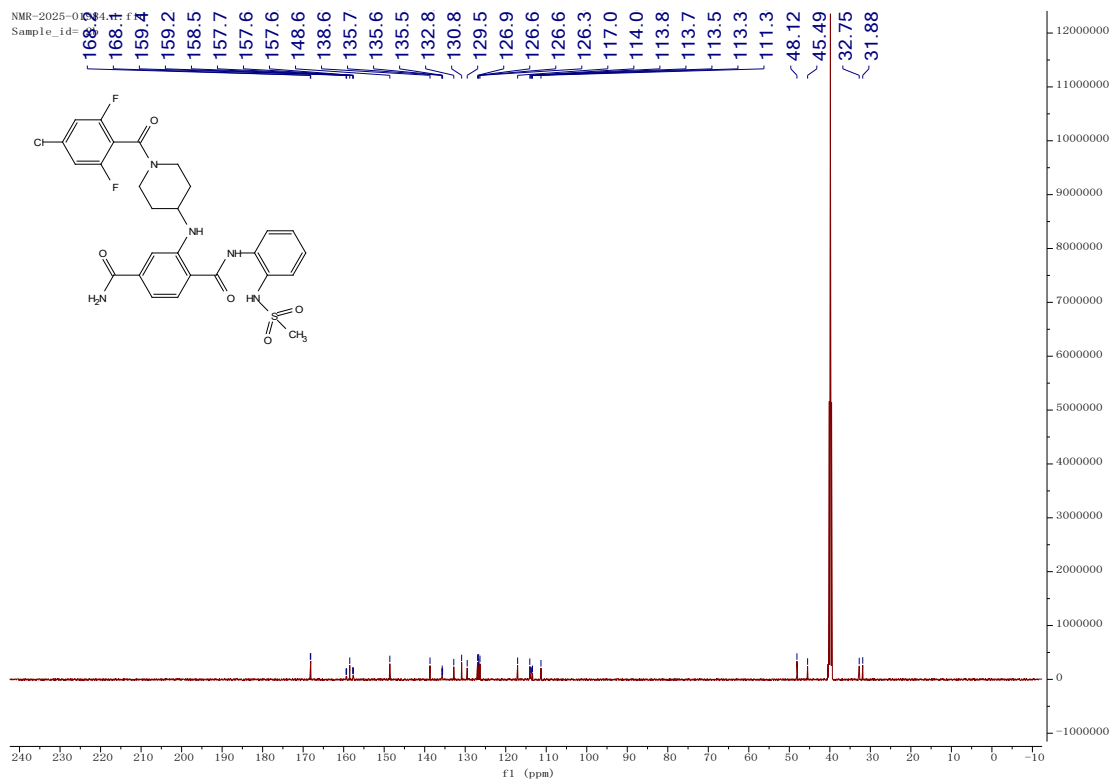

Figure 117. <sup>13</sup>C NMR spectrum of compound C10

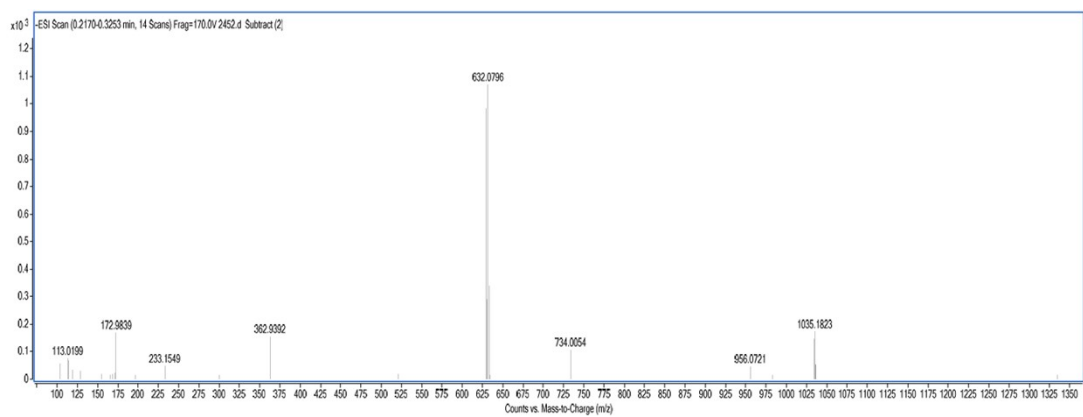

Figure 118. HRMS spectrum of compound C11

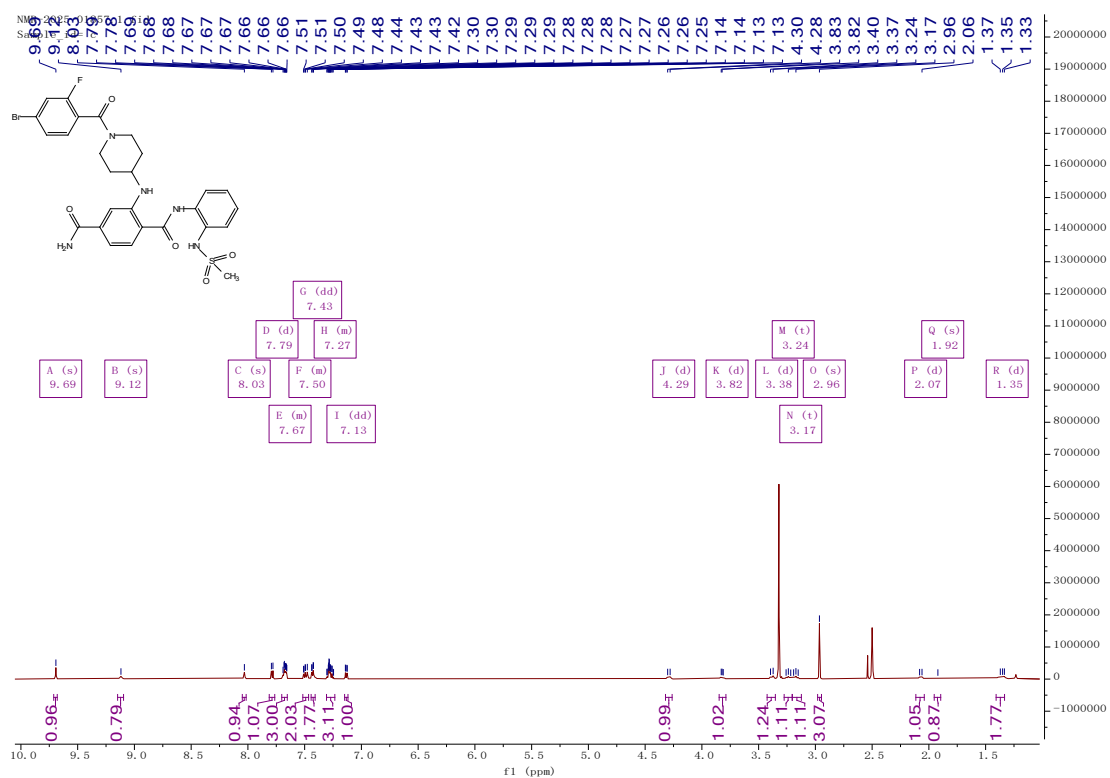

Figure 119. <sup>1</sup>H NMR spectrum of compound C11

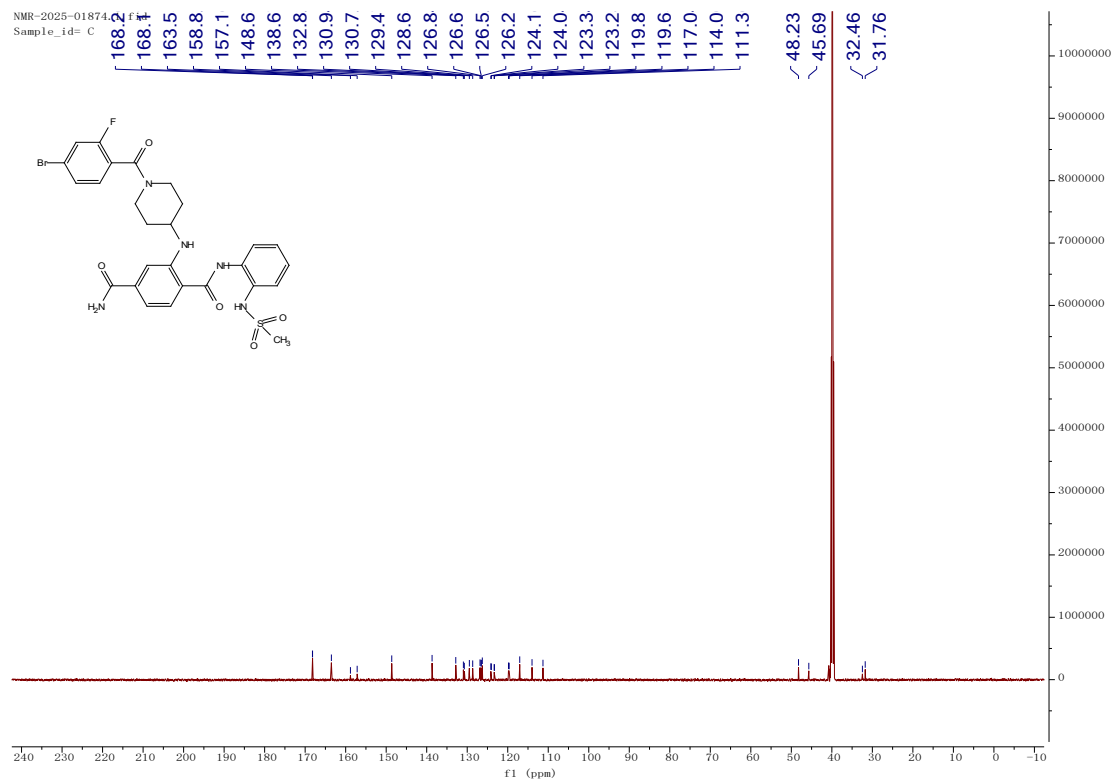

**Figure 120.**  $^{13}\text{C}$  NMR spectrum of compound C11

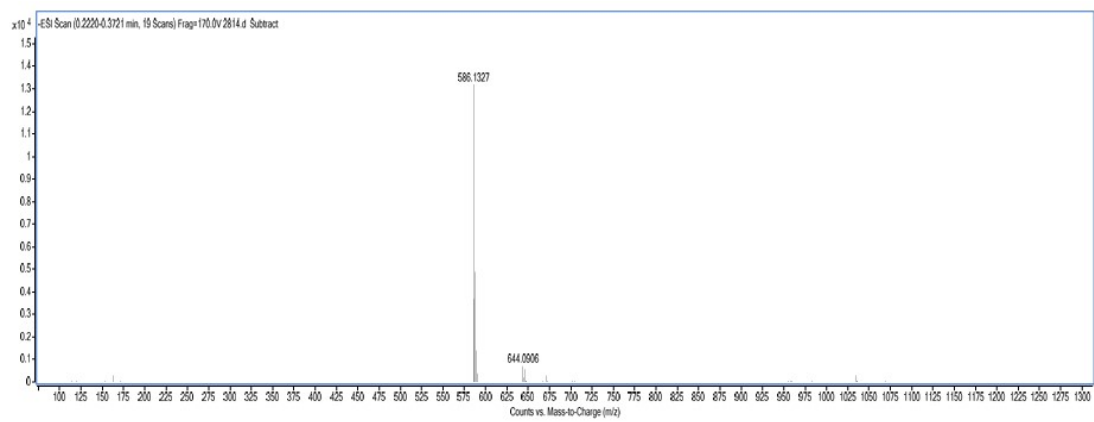

**Figure 121.** HRMS spectrum of compound C12

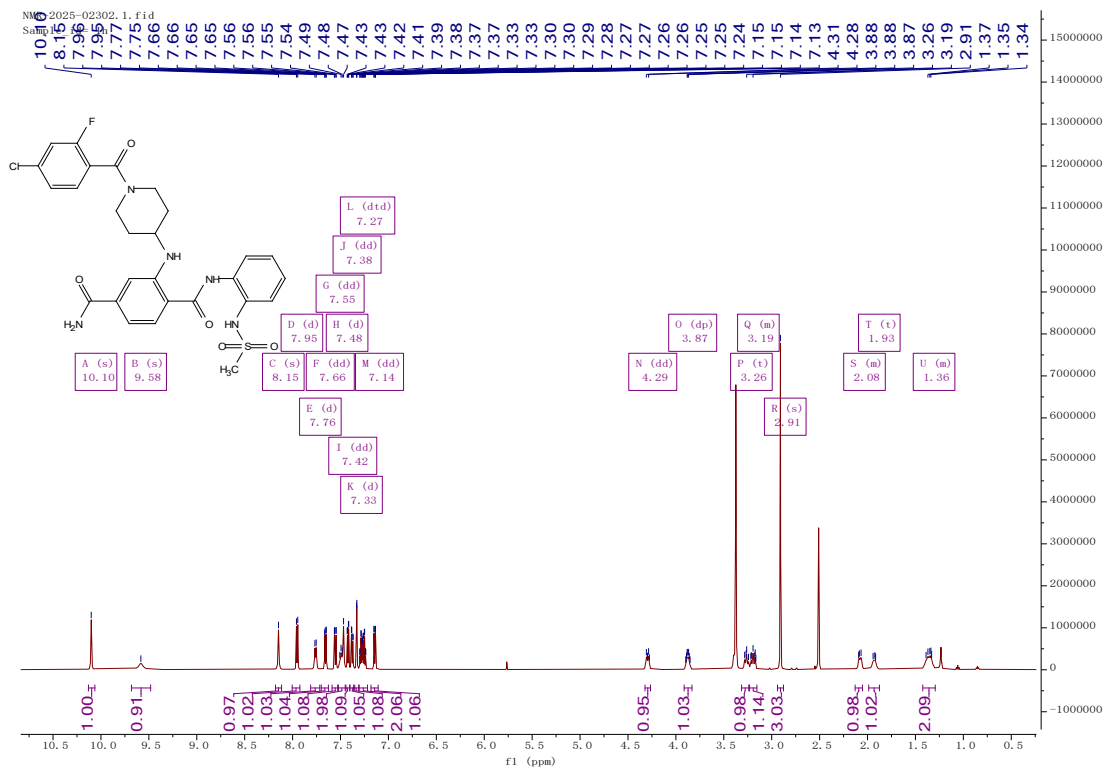

Figure 122. <sup>1</sup>H NMR spectrum of compound C12

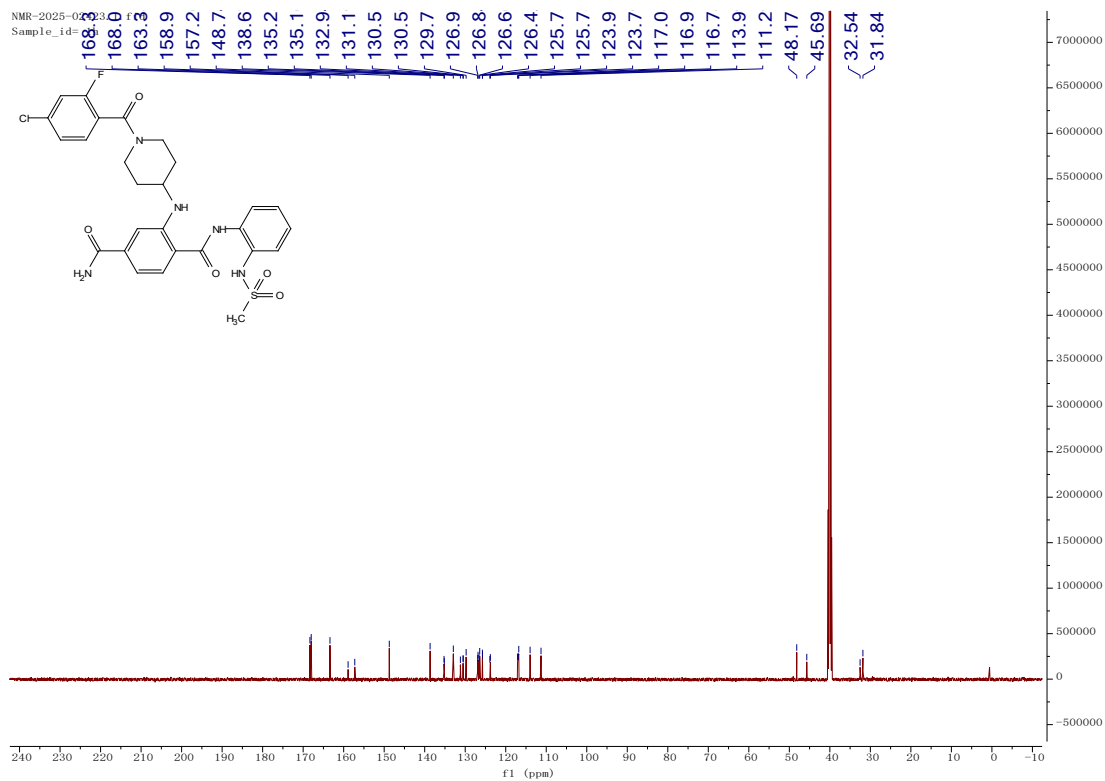

Figure 123. <sup>13</sup>C NMR spectrum of compound C12

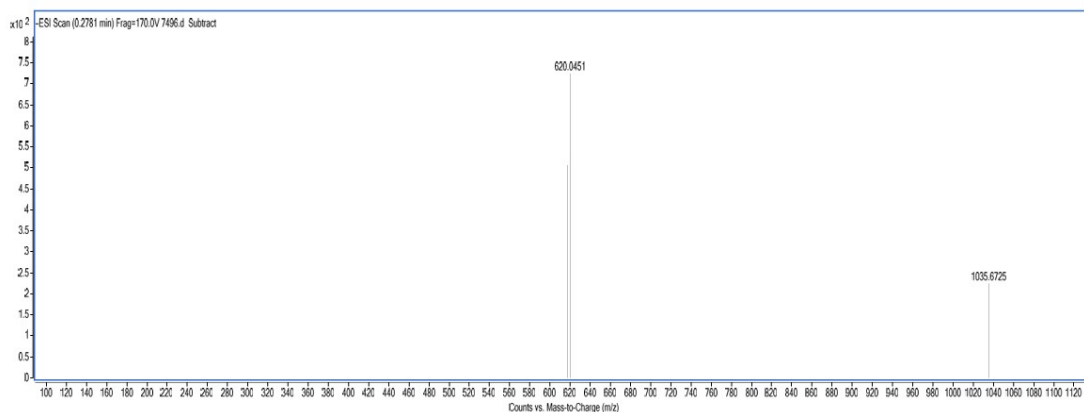

Figure 124. HRMS spectrum of compound C13

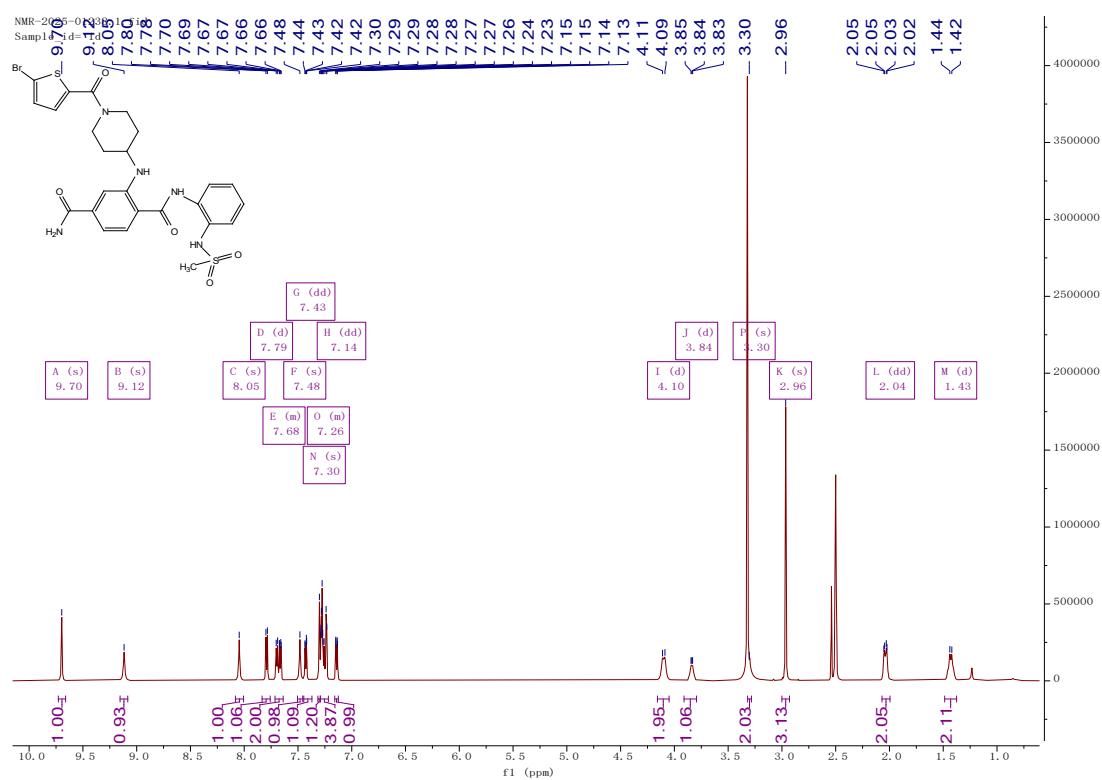

Figure 125. <sup>1</sup>H NMR spectrum of compound C13

NMR-2025-02197.1.fid  
Sample\_id= d

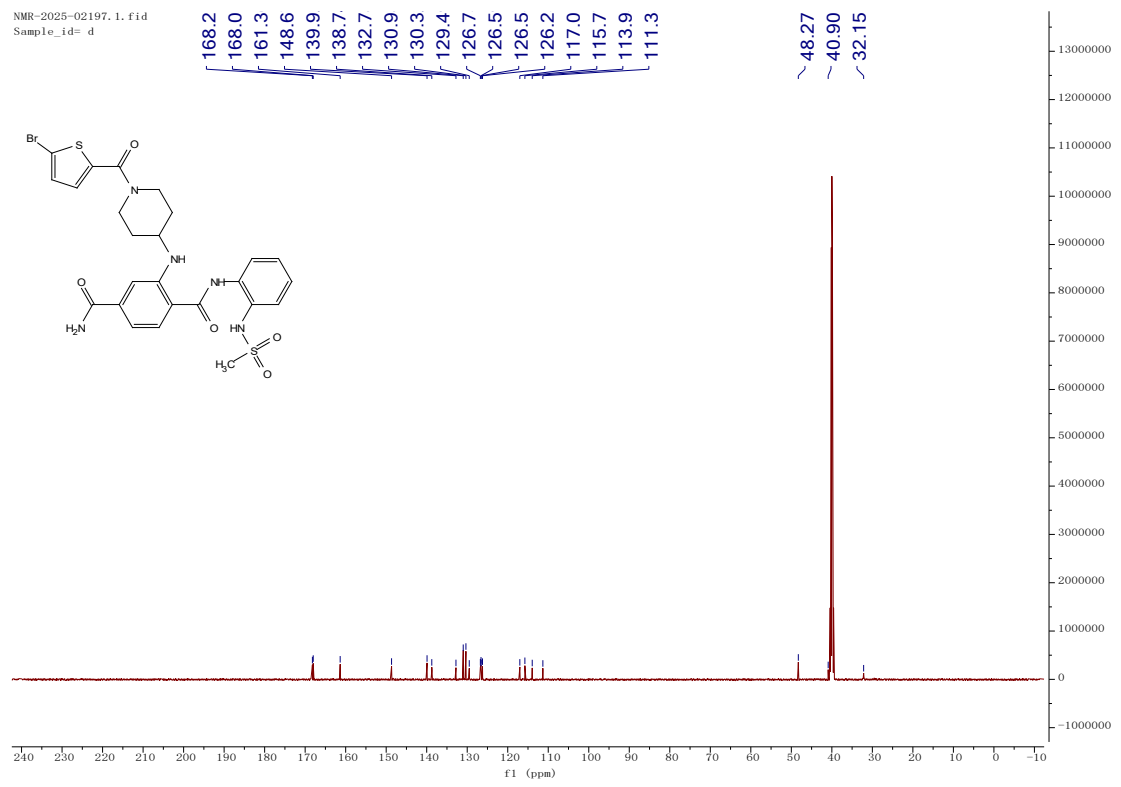

Figure 126. <sup>13</sup>C NMR spectrum of compound C13

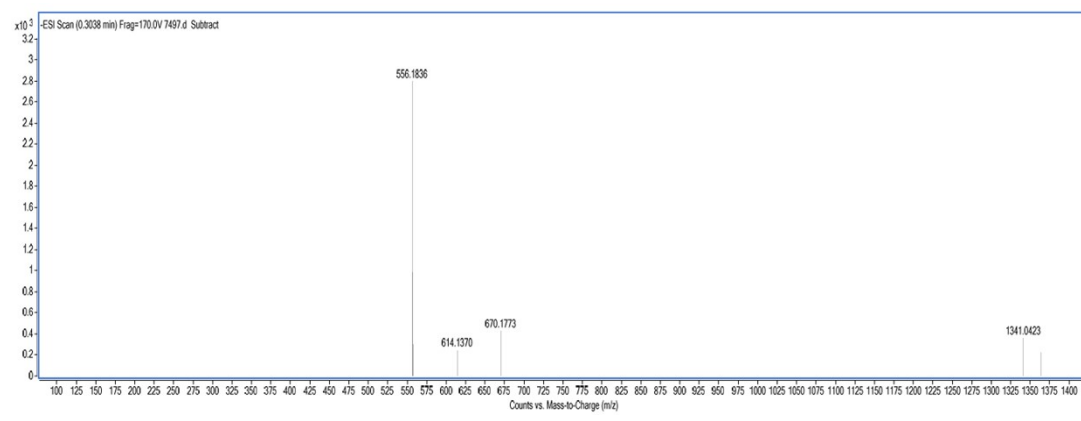

Figure 127. HRMS spectrum of compound C14

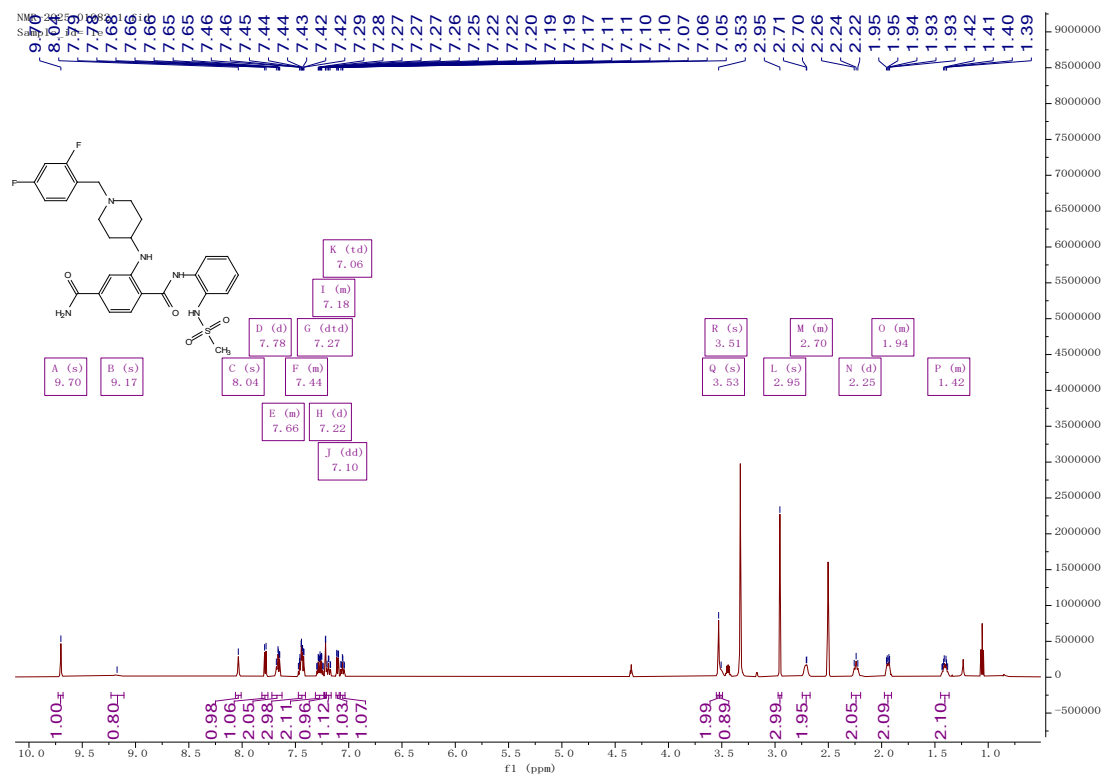

Figure 128.  $^1\text{H}$  NMR spectrum of compound C14

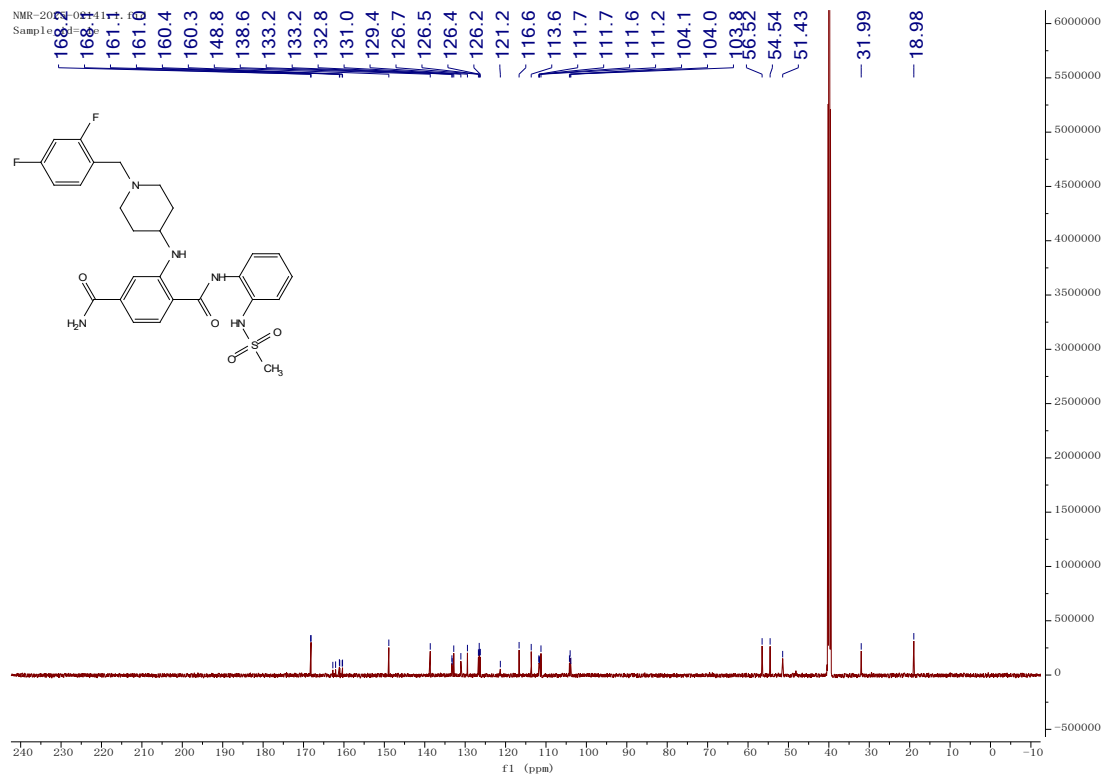

Figure 129.  $^{13}\text{C}$  NMR spectrum of compound C14

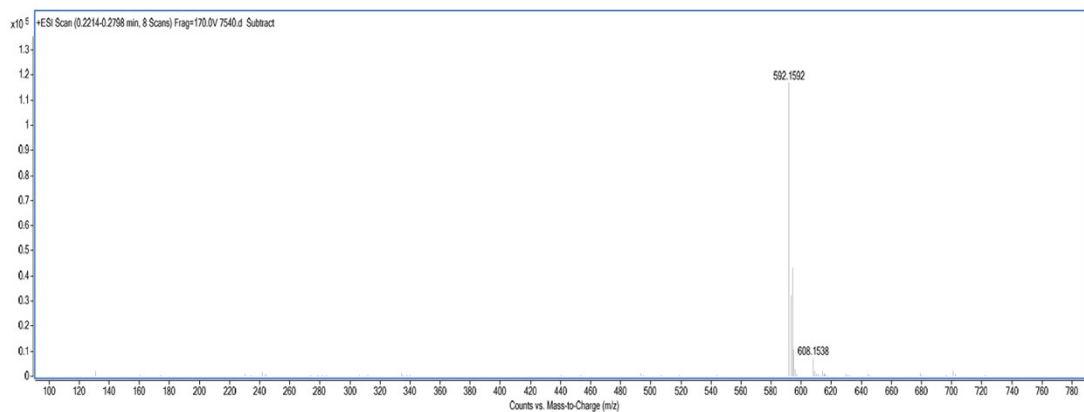

Figure 130. HRMS spectrum of compound C15

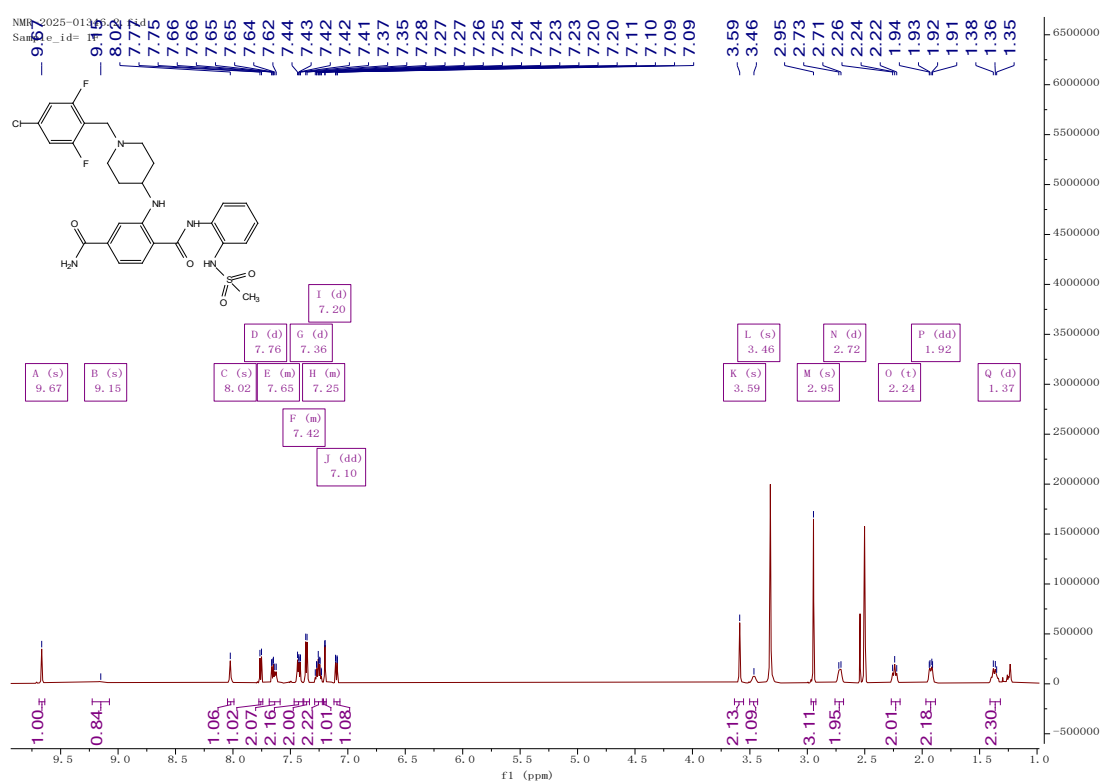

Figure 131.  $^1\text{H}$  NMR spectrum of compound C15

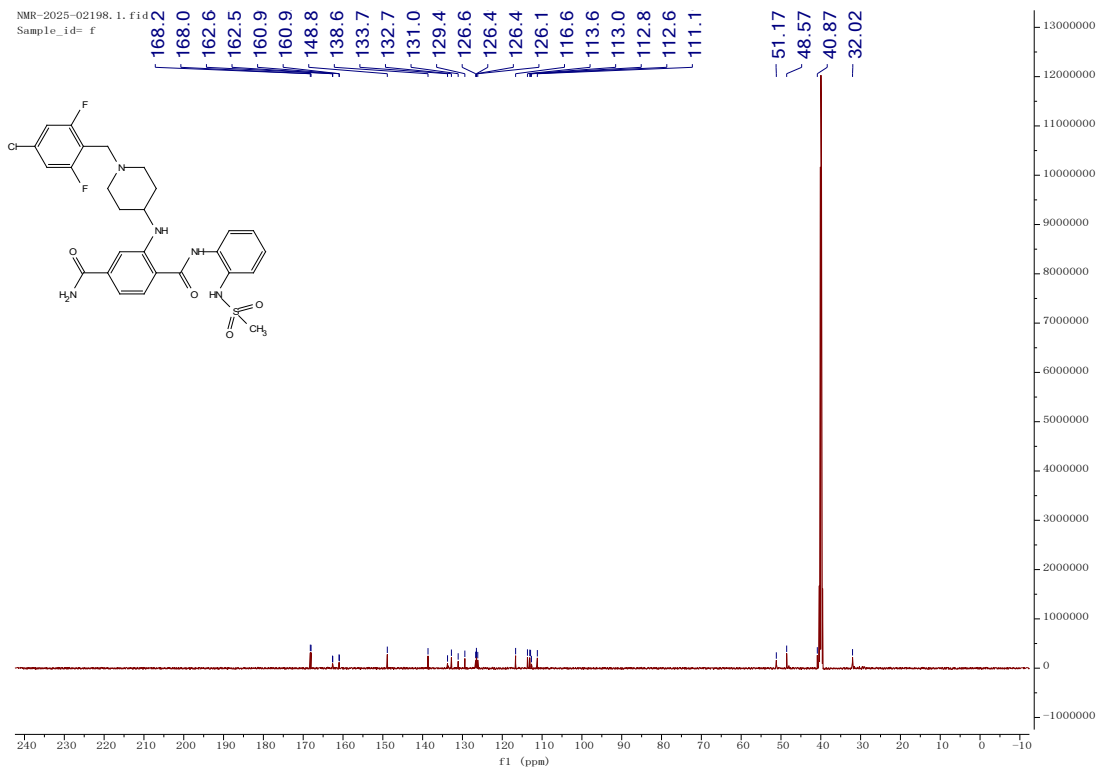

Figure 132.  $^{13}\text{C}$  NMR spectrum of compound C15

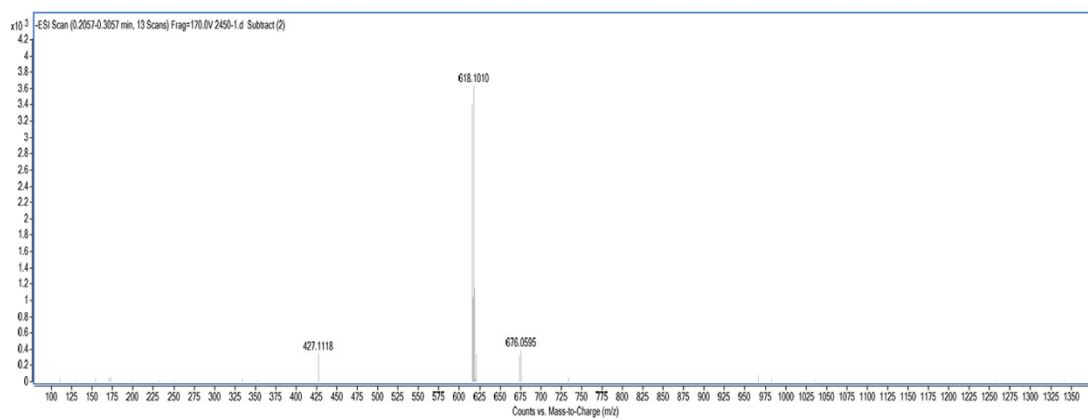

Figure 133. HRMS spectrum of compound C16

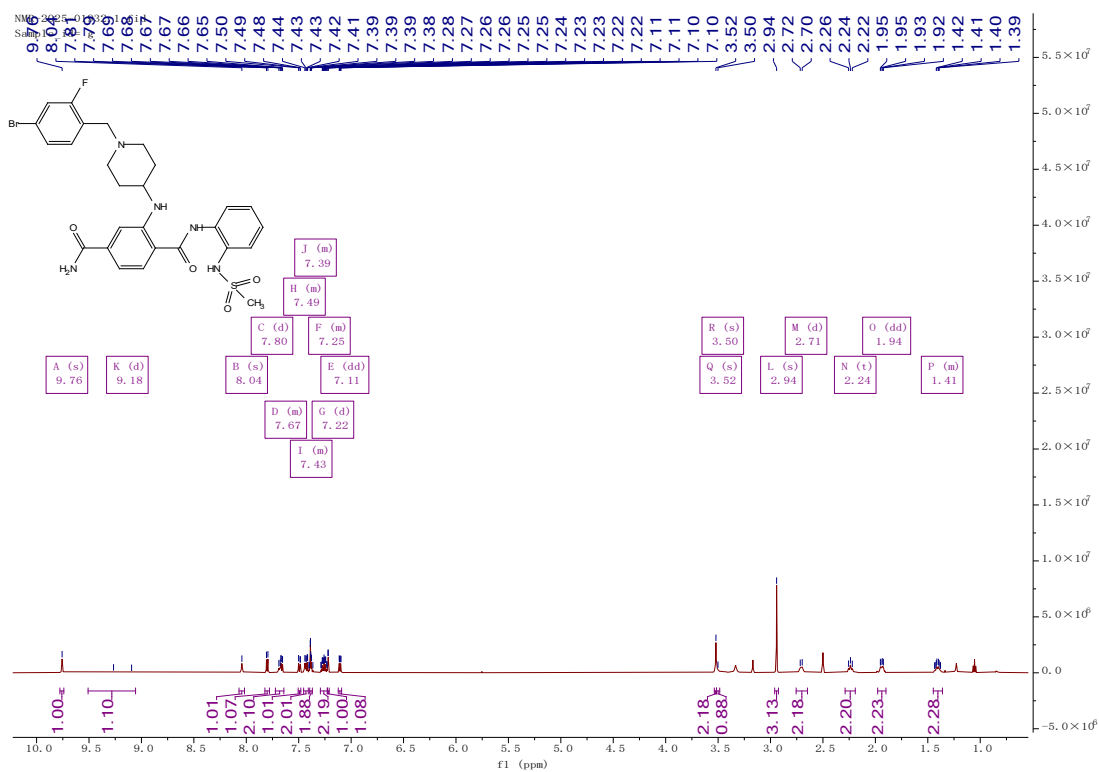

Figure 134. <sup>1</sup>H NMR spectrum of compound C16

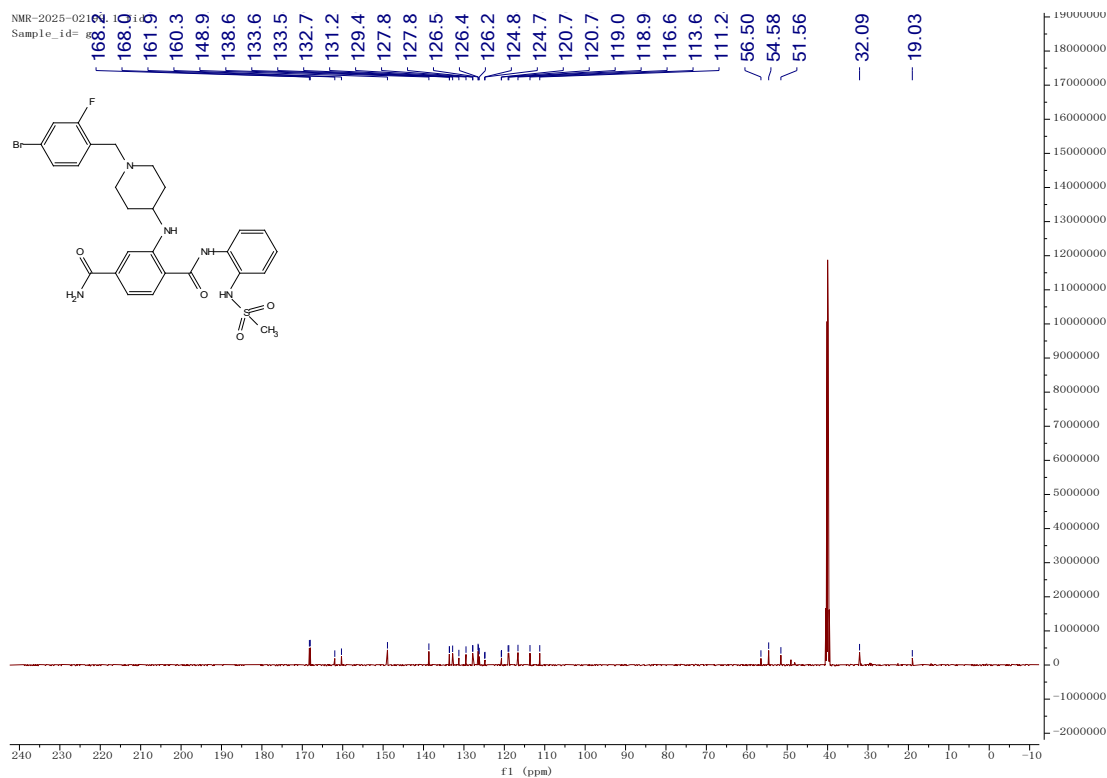

Figure 135. <sup>13</sup>C NMR spectrum of compound C16

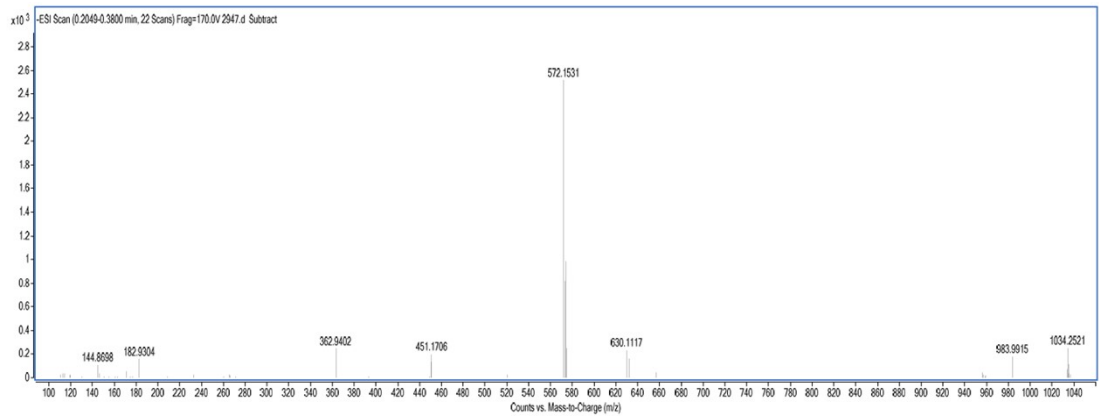

Figure 136. HRMS spectrum of compound C17

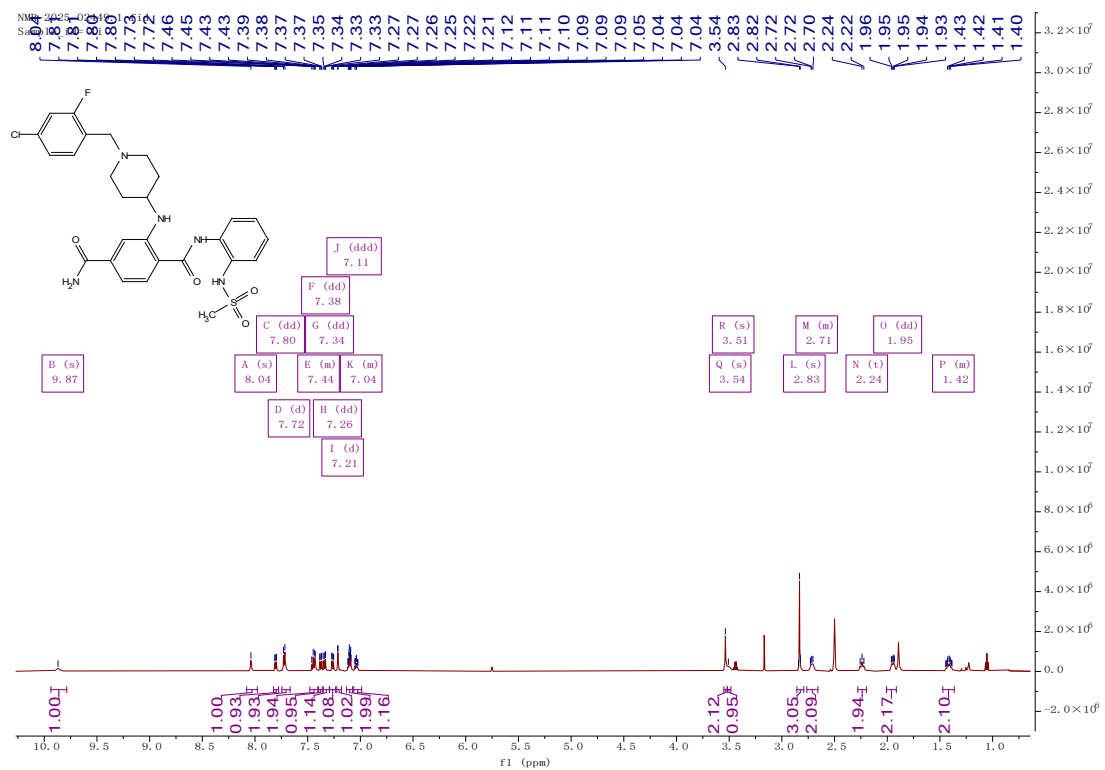

Figure 137. <sup>1</sup>H NMR spectrum of compound C17

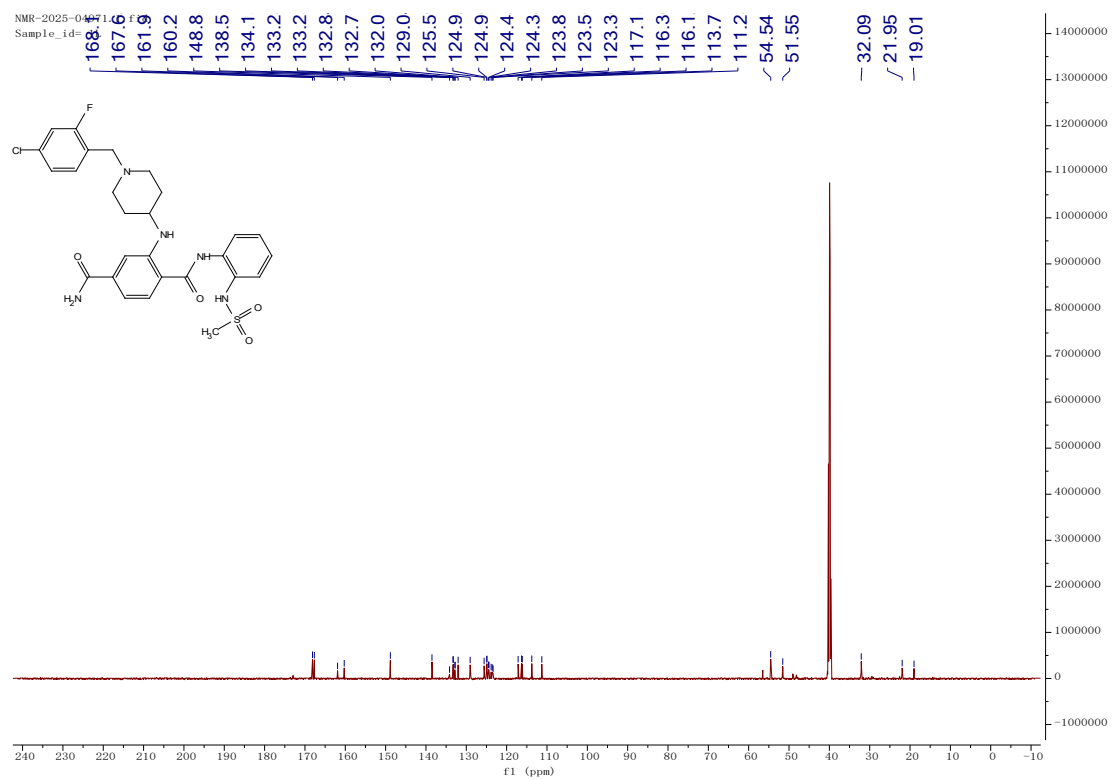

**Figure 138.**  $^{13}\text{C}$  NMR spectrum of compound C17
